# Supplementary material for: Determining the impact of uncharacterized inversions in the human genome by droplet digital PCR
Source: HighWire-hosted journal article supplement (doi:10.1101/gr.255273.119), 2020-05-01
Supplement: Supplemental_Tables.xlsx [file Supplemental_Tables.xlsx]

## Sheet: S1-Inversion features
Supplemental Table S1. Main characteristics and support of the inversions analyzed in this study. All inversions were selected from those mediated by large inverted repeats (IRs) (10-150 kb) in the InvFEST database (Martínez-Fundichely et al. 2014) and they derived mainly from fosmid paired-end mapping (PEM) predictions, a few of which had already been validated. The only exception was HsInv1111,…
		Reference genome			Inversion coordinates (hg38)						Inversion prediction by different methods
Inversion	Previous status	hg18	hg19	hg38	Chr	IR1	IR2	IR1 size (bp)	IR2 size (bp)	Inversion size (bp)	Fosmid PEM1,2	HuRef assembly3,4	Strand-seq5	Long reads6	Bionano7	Multi platform8	Additional evidences and validation
HsInv0233	Predicted	O1	O1	O1	1	Chr1:108221621-108310652	Chr1:108383727-108472664	89032	88938	73074	ü				ü	ü
HsInv0228	Predicted	O1	O1	O1	1	Chr1:149817486-149843518	Chr1:149850294-149876379	26033	26086	6775	ü	ü				ü
HsInv0012	Predicted	O1	O1	O1	1	Chr1:248459787-248519266	Chr1:248528796-248588406	59480	59611	9529	ü	ü			ü	ü	PEM9; Sequence analysis10
HsInv0241	Validated	O1	O1	O1	2	Chr2:240672507-240685789	Chr2:240688967-240701802	13283	12836	3177	ü			ü		ü	iPCR11,12
HsInv1057	Predicted	O1	O1	O1	6	Chr6:167165783-167196913	Chr6:167357873-167392651	31131	34779	160959	ü				ü	ü
HsInv0290	Validated	O1	O1	O1	7	Chr7:5893638-5992806	Chr7:6734543-6832887	99169	98345	741736	ü		ü		ü	ü	Chimp-human genome comparison13; FISH13,14
HsInv1111	Predicted	Incomplete	Incomplete	O1	8	Chr8:2232511-2343351	Chr8:2378385-2486876	110841	108492	35033					ü		Alternative BAC tiling path15
HsInv0370	Predicted	O1	O1	O1	16	Chr16:20411068-20501378	Chr16:20522346-20607534	90311	85189	20967	ü			ü
HsInv0786	Validated	O1	O1	O1	16	Chr16:28337952-28471892	Chr16:28643181-28777130	133941	133950	171288	ü		ü		ü	ü	Alternative BAC tiling path16
HsInv0573	Validated	O1	O1	O1	17	Chr17:45495836-45627799	Chr17:46217040-46707124	131964	490085	589240	ü		ü		ü		Alternative BAC tiling path17; FISH18-20
HsInv0382	Predicted	O1	O1	O1	20	Chr20:25752457-25845152	Chr20:26010758-26103777	92696	93020	165605	ü		ü		ü		Optical mapping21
HsInv1126	Predicted	O1	O1	O2	X	ChrX:51667325-51692963	ChrX:51700364-51725664	25639	25301	7400	ü	ü		ü		ü
HsInv0605	Predicted	O1	O1	O1	X	ChrX:52037053-52079317	ChrX:52168606-52213786	42265	45181	89288	ü		ü		ü	ü
HsInv0395	Predicted	O1	O1	O1	X	ChrX:55453530-55480141	ChrX:55493064-55519672	26612	26609	12922	ü					ü
HsInv0390	Validated	O1	O1	O1	X	ChrX:103918062-103989434	ChrX:104049429-104113598	71373	64170	59994	ü	ü	ü		ü	ü	Southern blot22
HsInv0822	Predicted	O1	O2	O2	X	ChrX:149652865-149681127	ChrX:149722144-149750398	28263	28255	41016	ü		ü			ü
HsInv0389	Validated	O1	O1	O1	X	ChrX:154335936-154347246	ChrX:154384868-154396222	11311	11355	37621	ü				ü	ü	Southern blot23; iPCR11; iMLPA12
HsInv0830	Predicted	O1	O1	O1	X	ChrX:154555685-154591327	ChrX:154613097-154648782	35643	35686	21769	ü				ü	ü
HsInv0608	Predicted	O1	O1	O1	X	ChrX:155336693-155386727	ChrX:155453983-155504550	50035	50568	67255	ü				ü		Hemophilia pathological variants24; HF-PCR25
HsInv0416	Predicted	O1	O1	O1	Y	ChrY:21005927-21021692	ChrY:21047765-21063547	15776	15773	32293	ü		ü		ü
REFERENCES
1. Kidd JM, Cooper GM, Donahue WF, Hayden HS, Sampas N, Graves T, Hansen N, Teague B, Alkan C, Antonacci F, et al. 2008. Mapping and sequencing of structural variation from eight human genomes. Nature 453: 56–64.
2. Martínez-Fundichely A, Casillas S, Egea R, Ràmia M, Barbadilla A, Pantano L, Puig M, Cáceres M. 2014. InvFEST, a database integrating information of polymorphic inversions in the human genome. Nucleic Acids Res. 42: D1027–32.
3. Levy S, Sutton G, Ng PC, Feuk L, Halpern AL, Walenz BP, Axelrod N, Huang J, Kirkness EF, Denisov G, et al. 2007. The diploid genome sequence of an individual human. PLoS Biol. 5: e254.
4. Pang AW, MacDonald JR, Pinto D, Wei J, Rafiq MA, Conrad DF, Park H, Hurles ME, Lee C, Venter JC, et al. 2010. Towards a comprehensive structural variation map of an individual human genome. Genome Biol. 11: R52.
5. Sanders AD, Hills M, Porubský D, Guryev V, Falconer E, Lansdorp PM. 2016. Characterizing polymorphic inversions in human genomes by single cell sequencing. Genome Res. 26: 1575–87.
6. Audano PA, Sulovari A, Graves-Lindsay TA, Cantsilieris S, Sorensen M, Welch AE, Dougherty ML, Nelson BJ, Shah A, Dutcher SK, et al. 2019. Characterizing the major structural variant alleles of the human genome. Cell 176: 663–75.
7. Levy-Sakin M, Pastor S, Mostovoy Y, Li L, Leung AKY, McCaffrey J, Young E, Lam ET, Hastie AR, Wong KHY, et al. 2019. Genome maps across 26 human populations reveal population-specific patterns of structural variation. Nat Commun. 10: 1025.
8. Chaisson MJP, Sanders AD, Zhao X, Malhotra A, Porubsky D, Rausch T, Gardner EJ, Rodriguez OL, Guo L, Collins RL, et al. 2019. Multi-platform discovery of haplotype-resolved structural variation in human genomes. Nat Commun. 10: 1784.
9. Ahn S-M, Kim T-H, Lee S, Kim D, Ghang H, Kim D-S, Kim B-C, Kim S-Y, Kim W-Y, Kim C, et al. 2009. The first Korean genome sequence and analysis: full genome sequencing for a socio-ethnic group. Genome Res. 19: 1622–9.
10. Vicente-Salvador D, Puig M, Gayà-Vidal M, Pacheco S, Giner-Delgado C, Noguera I, Izquierdo D, Martínez-Fundichely A, Ruiz-Herrera A, Estivill X, et al. 2017. Detailed analysis of inversions predicted between two human genomes: errors, real polymorphisms, and their origin and population distribution. Hum. Mol. Genet. 26: 567–81.
11. Aguado C, Gayà-Vidal M, Villatoro S, Oliva M, Izquierdo D, Giner-Delgado C, Montalvo V, García-González J, Martínez-Fundichely A, Capilla L, et al. 2014. Validation and genotyping of multiple human polymorphic inversions mediated by inverted repeats reveals a high degree of recurrence ed. G.S. Barsh. PLoS Genet. 10: e1004208.
12. Giner-Delgado C, Villatoro S, Lerga-Jaso J, Gaya-Vidal M, Oliva M, Castellano D, Pantano L, Bitarello B, Izquierdo D, Noguera I, et al. 2019. Evolutionary and functional impact of polymorphic inversions in the human genome. Nat. Commun. 10: 4222.
13. Feuk L, MacDonald JR, Tang T, Carson AR, Li M, Rao G, Khaja R, Scherer SW. 2005. Discovery of human inversion polymorphisms by comparative analysis of human and chimpanzee DNA sequence assemblies. PLoS Genet. 1: e56.
14. Szamalek JM, Cooper DN, Schempp W, Minich P, Kohn M, Hoegel J, Goidts V, Hameister H, Kehrer-Sawatzki H. 2006. Polymorphic micro-inversions contribute to the genomic variability of humans and chimpanzees. Hum. Genet. 119: 103–112.
15. This work.
16. Martin J, Han C, Gordon LA, Terry A, Prabhakar S, She X, Xie G, Hellsten U, Chan YM, Altherr M, et al. 2004. The sequence and analysis of duplication-rich human chromosome 16. Nature 432: 988–94.
17. Stefansson H, Helgason A, Thorleifsson G, Steinthorsdottir V, Masson G, Barnard J, Baker A, Jonasdottir A, Ingason A, Gudnadottir VG, et al. 2005. A common inversion under selection in Europeans. Nat. Genet. 37: 129–37.
18. Zody MC, Jiang Z, Fung HC, Antonacci F, Hillier LW, Cardone MF, Graves TA, Kidd JM, Cheng Z, Abouelleil A et al. 2008. Evolutionary toggling of the MAPT 17q21.31 inversion region. Nat Genet. 40: 1076-83.
19. Antonacci F, Kidd JM, Marques-Bonet T, Ventura M, Siswara P, Jiang Z, Eichler EE. 2009. Characterization of six human disease-associated inversion polymorphisms. Hum. Mol. Genet. 18: 2555–66.
20. Steinberg KM, Antonacci F, Sudmant PH, Kidd JM, Campbell CD, Vives L, Malig M, Scheinfeldt L, Beggs W, Ibrahim M, et al. 2012. Structural diversity and African origin of the 17q21.31 inversion polymorphism. Nat. Genet. 44: 872–80.
21. Teague B, Waterman MS, Goldstein S, Potamousis K, Zhou S, Reslewic S, Sarkar D, Valouev A, Churas C, Kidd JM, et al. 2010. High-resolution human genome structure by single-molecule analysis. Proc. Natl. Acad. Sci. U.S.A. 107: 10848–53.
22. Beck CR, Carvalho CMB, Banser L, Gambin T, Stubbolo D, Yuan B, Sperle K, McCahan SM, Henneke M, Seeman P, et al. 2015. Complex genomic rearrangements at the PLP1 locus include triplication and quadruplication. ed. N.B. Spinner. PLoS Genet. 11: e1005050.
23. Small K, Iber J, Warren ST. 1997. Emerin deletion reveals a common X-chromosome inversion mediated by inverted repeats. Nat. Genet. 16: 96–9.
24. Antonarakis SE, Rossiter JP, Young M, Horst J, de Moerloose P, Sommer SS, Ketterling RP, Kazazian HH, Négrier C, Vinciguerra C, et al. 1995. Factor VIII gene inversions in severe hemophilia A: results of an international consortium study. Blood 86: 2206–12.
25. Turner DJ, Shendure J, Porreca G, Church G, Green P, Tyler-Smith C, Hurles ME. 2006. Assaying chromosomal inversions by single-molecule haplotyping. Nat. Methods 3: 439–45.
Vicente-Salvador D, Puig M, Gayà-Vidal M, Pacheco S, Giner-Delgado C, Noguera I, Izquierdo D, Martínez-Fundichely A, Ruiz-Herrera A, Estivill X, et al. 2017. Detailed analysis of inversions predicted between two human genomes: errors, real polymorphisms, and their origin and population distribution. Hum Mol Genet 26: 567–81.

## Sheet: S2-Experimental details
Supplemental Table S2. Experimental details of ddPCR assays for inversion validation and genotyping. The probe in the amplicon common to both orientations was labelled with HEX and the probes in the O1 and O2 specific amplicons with FAM. O1 amplicon distances were calculated from the hg38 genome assembly, except for HsInv0822 and HsInv1126, for which the hg18 or hg19 assembly was used, respective…
Inversion	Chr	O2 sequence source			Digestion	Primers / probes	Amplicon distance (bp)				Polymorphic deletions within inversion breakpoints
		Name	Individual	GenBank accession			O1		O2		Allele	Affected IR	Size (kb)	BP features	Coordinates (hg38)	Supporting evidence	Reference
HsInv0389	X	ABC24-148L10 (BP1) ABC24-1681E12 (BP2)	NA18502	AC240520.3 AC240674.2	BglII	ABC	AB	12102	AC	13417	-	-	-	-	-	-	-
HsInv0241	2	ABC11-47190600P15 (BP1)	NA18555	AC231286.2	EcoRV	ABD	AB	13755	BD	14719	-	-	-	-	-	-	-
		ABC10-44525200E14 (BP2)	NA19240	AC210706.3		ACD	CD	15332	AC	14148
HsInv0416	Y	ABC8-724240H6 (BP2)	NA18507	AC226836.2	DrdI	ABC	AB	16891	AC	~23,700	-	-	-	-	-	-	-
HsInv0228	1	ABC16-1595G22 (BP1) ABC16-2128H13 (BP2)	NA18947	AC240503.2 AC238685.3	SnaBI	BCD	CD	27392	BD	27401	-	-	-	-	-	-	-
HsInv1126	X	hg38 assembly	Unknown	GCA_000001405.27	-	ABC	AB	28514	AC	28454	-	-	-	-	-	-	-
HsInv0395	X	ABC7-42499200N3 (BP1)	NA18517	AC233713.2	SwaI	BCD	CD	28708	BD	28498	-	-	-	-	-	-	-
		ABC21-545J4 (BP2)	NA11993	AC240279.2
HsInv0822	X	hg38 assembly	Unknown	GCA_000001405.27	-	ABC	AB	33709	AC	31139	-	-	-	-	-	-	-
HsInv0830	X	RP11-696D6	Unknown	AC240623.3	PacI	ABC	AB	36782	AC	41501	-	-	-	-	-	-	-
HsInv1057	6	-	-	-	-	ACD	CD	39757	AC	~35,300	-	-	-	-	-	-	-
HsInv0605	X	NA19240_prelim_3.0 assembly	NA19240	GCA_001524155.4	SalI	ABC	AB	43918	AC	50087	-	-	-	-	-	-	-
HsInv0608	X	HG01352_prelim_1.0 assembly	HG01352	GCA_002209525.1	SwaI	ABC	AB	64388	AC	57587	-	-	-	-	-	-	-
HsInv0390	X	PacBioCHM1_r2_GenBank_08312015 assembly	CHM1	GCA_001297185.1	-	BCD	CD	80737	BD	61290	O1/O2	IR2	24.8	-	ChrX:104066827-104091597	Predicted by optical mapping in NA19240 (nsv3203818)*	Chaisson et al. 2019
						ABC	AB	78149	AC	87666
HsInv0370	16	-	-	-	SalI	BCD	CD	91885	BD	~100,150	-	-	-	-	-	-	-
HsInv0233	1	Chr1_KV880763v1_alt	NA19434	KV880763.1	-	ABC	AB	99682	AC	123389	O1	IR2 (CD)	74.5	11.6-kb direct repeats	Chr1:108380908-108455368	VMRC62-119L16 (HG00733)	-
						BCD	CD	123724	BD	99753
HsInv0382	20	-	-	-	-	ABD	AB	103883	BD	~117,100	O1	IR1 (AB)	64.7	35/40.5-kb direct repeats	Chr20:25800764-25865433	Predicted by optical mapping in NA12878	Li et al. 2017
						ACD	CD	131999	AC	~118,750
HsInv1111	8	Chr8_KI270821v1_alt	Unknown	KI270821.1	-	BCD	CD	109134	BD	96037	O2	IR2 (BD)	15.8	5-bp microhomology	Chr8:2401778-2417633	Chr8_KI270821v1_alt haplotype1	-
						ABC	AB	112574	AC	110475
HsInv0290	7	-	-	-	-	BCD	CD	131765	BD	~107,150	-	-	-	-	-	-	-
HsInv0573	17	Chr17_GL000258v2_alt (H2 haplotype)	Unknown	GL000258.2	-	A1-A2-B	A1B	146209	A1-A2 Ref	147172	-	-	-	-	-	-	-
HsInv0786	16	EIFVar2	RPCI-11 BAC library	J. Martin (personal communication)	-	ABC	AB	148082	AC	164528	O1	IR1 (AB)	41.5	-	Chr16:28364895-28406347	Predicted by oligo aCGH in NA18537 (nssv23267)†	Perry et al. 2008
* Deletions in inversions HsInv390 and HsInv1111 do not affect inversion genotyping. Linkage values from chromosomes with or without the deletion do not appear to be very different since in each case there are only three expected compact clusters without linkage ratios departing from the expected values, although in both cases a higher average total linkage value is observed for the breakpoints c…
† The deletion in HsInv0786 was found in NA18537, which is the only sample with an extremely high total linkage in all ddPCR experiments consistent with the presence of the deletion, although it does not affect the observed O1/O1 genotype.
REFERENCES
Audano PA, Sulovari A, Graves-Lindsay TA, Cantsilieris S, Sorensen M, Welch AE, Dougherty ML, Nelson BJ, Shah A, Dutcher SK, et al. 2019. Characterizing the major structural variant alleles of the human genome. Cell 176: 663–75.
Chaisson MJP, Sanders AD, Zhao X, Malhotra A, Porubsky D, Rausch T, Gardner EJ, Rodriguez OL, Guo L, Collins RL, et al. 2019. Multi-platform discovery of haplotype-resolved structural variation in human genomes. Nat. Commun. 10: 1784.
Levy-Sakin M, Pastor S, Mostovoy Y, Li L, Leung AKY, McCaffrey J, Young E, Lam ET, Hastie AR, Wong KHY, et al. 2019. Genome maps across 26 human populations reveal population-specific patterns of structural variation. Nat. Commun. 10: 1025.
Li L, Leung AK-Y, Kwok T-P, Lai YYY, Pang IK, Chung GT-Y, Mak ACY, Poon A, Chu C, Li M, et al. 2017. OMSV enables accurate and comprehensive identification of large structural variations from nanochannel-based single-molecule optical maps. Genome Biol. 18: 230.
Perry GH, Ben-Dor A, Tsalenko A, Sampas N, Rodriguez-Revenga L, Tran CW, Scheffer A, Steinfeld I, Tsang P, Yamada NA et al. 2008. The fine-scale and complex architecture of human copy-number variation. Am. J. Hum. Genet. 82: 685-95.
Sudmant PH, Rausch T, Gardner EJ, Handsaker RE, Abyzov A, Huddleston J, Zhang Y, Ye K, Jun G, Fritz MH et al. 2015. An integrated map of structural variation in 2,504 human genomes. Nature 526: 75-81.

## Sheet: S3-Genotypes
Supplemental Table S3. Genotypes of the 19 inversions interrogated in a larger population sample with ddPCR assays. For the genotypes in the 95 samples analyzed for all the inversions, the score from the clustering analysis of O1 linkage ratios, representing the proportion of times that the sample is clustered in the same genotype group, is shown at its side. Those samples that were not genotyped…
Individual	Origin	Population	Sex	Family	Relationship	Plate	1000GP Ph3	HsInv0228		HsInv0233		HsInv0241		HsInv0290		HsInv0370		HsInv0382		HsInv0389		HsInv0390		HsInv0395		HsInv0416		HsInv0573		HsInv0605		HsInv0608		HsInv0786		HsInv0822		HsInv0830		HsInv1057		HsInv1111		HsInv1126
NA18498	Africa	YRI	Male	Y003	Father	HapMap04	Yes	O2/O2	1			O1/O2	1	O1/O1	1	O1/O2	1	O1/O1	1	O2	1	O1	1	O1	1	O2	1	O1/O1	1	O1	1	O2	1	O1/O2	1	O2	1	O2	1	O1/O1	1	O2/O2	1	O1	1
NA18502	Africa	YRI	Female	Y004	Mother	HapMap03	Yes	O2/O2	1			O2/O2	1	O1/O1	1	O1/O2	1	O1/O1	1	O2/O2	1	O1/O1	1	O1/O2	1	-	-	O1/O1	1	O1/O2	1	O2/O2	1	O1/O1	1	O1/O1	1	O1/O1	1	O1/O1	1	O2/O2	1	O1/O1	1
NA18505	Africa	YRI	Female	Y005	Mother	HapMap03	Yes	O1/O2	1			O1/O2	1	O1/O2	1	O2/O2	1	O1/O1	1	O2/O2	1	O1/O1	1	O1/O2	1	-	-	O1/O1	0.998	O1/O1	1	O1/O1	1	O1/O2	1	O1/O2	1	O2/O2	1	O1/O1	1	O2/O2	1	O1/O2	1
NA18507	Africa	YRI	Male	Y009	Father	HapMap03	Yes	O1/O2	1			O1/O2	1	O1/O1	1	O1/O1	1	O2/O2	1	O2	1	O1	1	O2	1	O2	1	O1/O1	1	O2	1	O1	1	ND	0.931	O2	1	O2	1	O1/O2	1	O1/O2	1	O1	1
NA18508	Africa	YRI	Female	Y009	Mother	HapMap03	Yes	O1/O1	1			O2/O2	1	O1/O2	1	O1/O1	1	O1/O2	1	O2/O2	1	O1/O2	1	O2/O2	1	-	-	O1/O1	1	O1/O2	1	O1/O1	1	O1/O1	1	O2/O2	1	O2/O2	1	O1/O1	1	O1/O1	1	O1/O2	1
NA18517	Africa	YRI	Female	Y013	Mother	HapMap03	Yes	O2/O2	1			O1/O2	1	O1/O1	1	O1/O2	1	O1/O2	0.999	O2/O2	1	O1/O1	1	O1/O2	1	-	-	O1/O1	0.998	O2/O2	1	O1/O1	1	O1/O1	1	O1/O2	1	O2/O2	1	O1/O1	1	O2/O2	1	O1/O2	1
NA18519	Africa	YRI	Male	Y014	Father	HapMap04	Yes	O1/O1	1			O1/O1	1	O1/O1	1	O1/O1	1	O1/O2	1	O2	1	O2	1	O1	1	O2	1	O1/O1	1	O1	1	O1	1	O1/O2	1	O1	1	O2	1	O1/O2	1	O2/O2	1	O1	1
NA18867	Africa	YRI	Female	Y007	Mother	HapMap04	Yes	O2/O2	1			O1/O2	1	O1/O1	1	O1/O1	1	O1/O2	1	O2/O2	1	O1/O2	1	O1/O2	1	-	-	O1/O1	0.998	O1/O1	1	O1/O1	1	O1/O1	0.977	O1/O2	1	O1/O2	1	O1/O1	1	O2/O2	1	O1/O1	1
NA18870	Africa	YRI	Female	Y017	Mother	HapMap03	Yes	O1/O2	1			O1/O2	1	O1/O1	1	O1/O1	1	O1/O2	0.999	O2/O2	1	O1/O2	0.999	O2/O2	1	-	-	O1/O1	1	O1/O2	1	O2/O2	1	O1/O2	0.970	O2/O2	1	O1/O2	1	O1/O1	1	O2/O2	1	O1/O1	1
NA18910	Africa	YRI	Male	Y027	Father	HapMap04	Yes	O2/O2	1			O2/O2	1	O1/O1	1	O1/O2	1	ND	-	O2	1	O1	1	O2	1	O2	1	O1/O1	1	O1	1	O1	1	O1/O2	0.974	O1	1	O2	1	O1/O2	1	O1/O2	1	O1	1
NA19092	Africa	YRI	Male	Y040	Father	HapMap03	Yes	O2/O2	1			O2/O2	1	O2/O2	-	O1/O2	1	O1/O1	1	O2	1	O1	1	O2	1	O2	1	O1/O1	0.999	O2	1	O1	1	O1/O1	1	O1	1	O2	1	O1/O2	1	O2/O2	1	O1	1
NA19098	Africa	YRI	Male	Y105	Father	HapMap03	Yes	O1/O2	1			O2/O2	1	O1/O1	1	O2/O2	1	O1/O1	1	O2	1	O2	1	O1	1	O2	1	O1/O1	0.995	O2	1	O1	1	O1/O2	0.959	O1	1	O2	1	O1/O1	1	O2/O2	1	O2	1
NA19099	Africa	YRI	Female	Y105	Mother	HapMap03	Yes	O1/O2	1			O2/O2	1	O1/O1	1	O1/O1	1	O1/O1	1	O2/O2	1	O1/O2	0.999	O2/O2	1	-	-	O1/O1	0.999	O2/O2	1	O2/O2	1	O1/O1	1	O1/O2	1	O2/O2	1	O1/O1	1	O1/O2	1	O1/O2	1
NA19102	Africa	YRI	Female	Y042	Mother	HapMap03	Yes	O1/O2	1			O2/O2	1	O1/O1	1	O1/O2	1	O1/O1	1	O2/O2	1	O1/O1	1	O1/O2	1	-	-	O1/O1	1	O1/O2	1	O1/O2	1	O1/O1	1	O2/O2	1	O1/O1	1	O1/O2	1	O2/O2	1	O1/O1	1
NA19108	Africa	YRI	Female	Y006	Mother	HapMap04	Yes	O1/O1	1			O1/O2	1	O1/O1	1	O1/O1	1	O1/O1	1	O2/O2	1	O1/O2	1	O1/O2	1	-	-	O1/O1	1	O1/O2	1	O1/O2	1	O1/O1	1	O1/O1	1	O2/O2	1	O1/O1	1	O1/O2	1	O1/O2	1
NA19118	Africa	YRI	Female	Y100	Mother	HapMap04	Yes	O1/O1	1			O1/O2	1	O1/O1	1	O2/Del	1	O1/O1	1	O2/O2	1	O1/O2	1	O1/O1	1	-	-	O1/O1	1	O1/O2	1	O2/O2	1	O1/O2	1	O1/O1	1	O1/O2	1	ND	-	O1/O2	1	O1/O2	1
NA19119	Africa	YRI	Male	Y060	Father	HapMap03	Yes	O1/O1	1			O2/O2	1	O1/O1	1	O1/O2	1	O1/O1	1	O2	1	O1	1	O2	1	O2	1	O1/O1	1	O1	1	O1	1	O1/O2	1	O1	1	O2	1	O1/O1	1	O2/O2	1	O2	1
NA19129	Africa	YRI	Female	Y077	Child	HapMap03	Yes	O1/O1	1	O2/O2	-	O1/O2	1	O1/O1	1	O1/O1	1	O1/O2	1	O2/O2	1	O1/O2	1	O1/O1	1	-	-	O1/O1	0.997	O2/O2	1	O1/O2	1	O1/O1	1	O1/O2	1	O1/O2	1	O1/O1	1	O2/O2	1	O1/O2	0.984
NA19130	Africa	YRI	Male	Y101	Father	HapMap03	Yes	O1/O2	1			O1/O2	1	O1/O1	1	O1/O1	1	O1/O1	1	O2	1	O2	1	O1	1	O2	1	O1/O1	1	O1	1	O2	1	O1/O1	1	O1	1	O1	1	O1/O1	1	O2/O2	1	O2	1
NA19141	Africa	YRI	Male	Y071	Father	HapMap03	Yes	O1/O2	1			O1/O1	1	O1/O1	1	O1/O2	1	ND	0.941	O2	1	O1	1	O1	1	O2	1	O1/O1	0.991	O2	1	O2	1	O1/O1	1	O1	1	O2	1	O1/O1	1	O2/O2	1	O1	1
NA19146	Africa	YRI	Male	Y075	Father	HapMap04	Yes	O1/O2	1			O1/O1	1	O1/O1	1	O2/O2	1	O1/O1	1	O2	1	O1	1	O2	1	O2	1	O1/O1	0.996	O1	1	O1	1	O1/O2	1	O2	1	O2	1	O1/O1	1	O1/O2	1	O1	1
NA19150	Africa	YRI	Male	Y073	Father	HapMap04	No	O1/O2	1			O1/O2	1	O1/O2	1	O1/O1	1	ND	-	O2	1	O1	1	O1	1	O2	1	O1/O1	1	O2	1	O1	1	O1/O1	0.992	O2	1	O2	1	O1/O1	1	O1/O1	1	O1	1
NA19152	Africa	YRI	Female	Y072	Mother	HapMap03	Yes	O2/O2	1			O1/O2	1	O1/O2	1	O2/O2	1	O1/O2	1	O2/O2	1	O1/O1	1	O2/O2	1	-	-	O1/O1	1	O1/O1	1	O1/O1	1	O1/O2	0.999	O1/O2	1	O1/O2	1	O1/O1	1	O1/O2	1	O1/O2	1
NA19160	Africa	YRI	Male	Y056	Father	HapMap03	Yes	O1/O2	1			O1/O2	1	O1/O1	1	O1/O1	1	O1/O1	1	O2	1	O1	1	O2	1	O2	1	O1/O1	1	O2	1	O1	1	O1/O1	1	O2	1	O2	1	O1/O1	1	O2/O2	1	O2	1
NA19171	Africa	YRI	Male	Y047	Father	HapMap03	Yes	O1/O2	1			O2/O2	1	O1/O1	1	O1/O1	1	O1/O2	1	O2	1	O1	1	O2	1	O2	1	O1/O1	1	O1	1	O1	1	O1/O1	1	O1	1	O1	1	O1/O2	1	O1/O2	1	O1	1
NA19189	Africa	YRI	Male	Y111	Father	HapMap04	Yes	O2/O2	1			O1/O2	1	O1/O1	1	O1/O2	1	ND	-	O2	1	O1	1	O1	1	O2	1	O1/O1	0.998	O1	1	O2	1	O1/O2	1	ND	-	O1	1	O1/O1	1	O1/O2	1	O1	1
NA19204	Africa	YRI	Female	Y048	Mother	HapMap03	Yes	O1/O2	1	O1/O2	-	O2/O2	1	O1/O2	1	O1/O1	1	O1/O1	1	O2/O2	1	O1/O1	1	O1/O2	1	-	-	O1/O1	1	O1/O2	1	O1/O2	1	O1/O2	1	O1/O2	1	O1/O1	1	O1/O1	1	O1/O1	1	O1/O2	1
NA19206	Africa	YRI	Female	Y051	Mother	HapMap03	Yes	O1/O2	1			O1/O1	1	O1/O1	1	O1/O2	1	ND	-	O2/O2	1	O1/O2	1	O1/O2	1	-	-	O1/O1	1	O1/O1	1	O1/O2	1	O1/O2	1	O1/O1	1	O1/O2	1	O1/O1	1	O1/O2	1	O1/O2	1
NA19207	Africa	YRI	Male	Y051	Father	HapMap03	Yes	O1/O1	1			O1/O2	1	O1/O2	1	O1/O1	1	O1/O2	1	O2	1	O1	1	O1	1	O2	1	O1/O1	1	O1	1	O2	1	O1/O1	1	O1	1	O2	1	O1/O1	1	O2/O2	1	O2	1
NA19209	Africa	YRI	Female	Y050	Mother	HapMap03	Yes	O2/O2	1			O1/O2	1	O1/O1	1	O1/O1	1	O1/O1	1	O2/O2	1	O1/O2	1	O2/O2	1	-	-	O1/O1	1	O1/O2	1	O1/O1	1	O1/O2	1	O1/O2	1	O1/O2	1	O1/O1	1	O1/O2	1	O1/O2	1
NA19213	Africa	YRI	Male	Y110	Father	HapMap04	Yes	O1/O2	1			O2/O2	1	O1/O1	1	O1/O1	1	O1/O1	1	O2	1	O2	1	O1	1	O2	1	O1/O1	1	O1	1	O2	1	O1/O1	1	O1	1	O1	1	O1/O2	1	O1/O1	1	O1	1
NA19240	Africa	YRI	Female	Y117	Child	HapMap03	No	O1/O2	1	O1/O2	-	O2/O2	1	O1/O1	1	O1/Del	1	O1/O1	1	O2/O2	1	O1/O2	1	O1/O1	1	-	-	O1/O1	0.998	O1/O2	1	O1/O1	1	ND	0.917	O1/O2	1	O2/O2	1	O1/O2	1	O1/O2	1	O1/O1	1
NA18526	East Asia	CHB	Female	-	Unrelated	HapMap02	Yes	O1/O2	1			O1/O2	1	O1/O1	1	O1/O1	1	O1/O1	1	O1/O1	1	O1/O2	1	O2/O2	1	-	-	O1/O1	1	O1/O1	1	O1/O1	1	O1/O1	1	O1/O2	1	O1/O2	1	O1/O1	1	O1/O2	1	O1/O2	1
NA18527	East Asia	CHB	Female	-	Unrelated	-	No	O1/O2	1			O1/O2	1	O1/O1	1	O1/O1	1	O1/O2	1	O1/O2	1	O1/O2	1	O1/O2	1	-	-	O1/O1	1	O1/O1	1	O1/O1	1	O1/O2	1	O1/O2	1	O1/O1	1	O1/O1	1	ND	0.842	O1/O2	1
NA18537	East Asia	CHB	Female	-	Unrelated	HapMap02	Yes	O2/O2	1			O1/O1	1	O1/O1	1	O1/O1	1	O1/O1	1	O1/O1	1	O1/O2	1	O1/O1	1	-	-	O1/O1	1	O1/O1	1	O1/O2	1	O1/O1	0.982	O1/O2	1	O1/O1	1	O1/O1	1	O2/O2	1	O1/O2	1
NA18550	East Asia	CHB	Female	-	Unrelated	HapMap02	Yes	O1/O2	1			O1/O2	1	O1/O1	1	O1/O1	1	O1/O1	1	O1/O1	1	O1/O2	1	O1/O1	1	-	-	O1/O1	0.998	O1/O1	1	O1/O1	1	O1/O1	1	O1/O2	1	O1/O1	1	O1/O1	1	O1/O2	1	O2/O2	1
NA18555	East Asia	CHB	Female	-	Unrelated	HapMap02	Yes	O1/O2	1			O2/O2	1	O1/O2	0.995	O1/O1	1	O1/O1	1	O1/O1	1	O1/O2	1	O1/O1	1	-	-	O1/O1	1	O1/O2	1	O1/O1	1	O1/O1	1	O1/O2	1	O1/O1	1	O1/O1	1	O2/O2	1	O2/O2	1
NA18562	East Asia	CHB	Male	-	Unrelated	HapMap02	Yes	O2/O2	1			ND	-	O1/O1	1	O1/O1	1	O1/O1	1	O1	1	O2	1	O1	1	O2	1	O1/O1	0.997	O2	1	O1	1	O1/O1	1	O2	1	O1	1	O1/O1	1	O1/O2	1	O1	1
NA18563	East Asia	CHB	Male	-	Unrelated	HapMap02	Yes	O2/O2	1			O1/O2	1	O1/O1	1	O1/O1	1	O1/O1	1	O2	1	O2	1	O1	1	O1	1	O1/O1	0.99	O1	1	O1	1	O1/O1	1	O2	1	O1	1	O1/O1	1	O1/O1	1	O2	1
NA18582	East Asia	CHB	Female	-	Unrelated	HapMap02	Yes	O2/O2	1			O1/O1	1	O1/O1	1	O1/O1	1	O1/O1	1	O1/O1	1	O2/O2	1	O1/O2	1	-	-	O1/O1	1	O1/O2	1	O1/O1	1	O1/O1	1	O1/O2	1	O1/O2	1	O1/O1	1	O1/O1	1	O1/O1	1
NA18603	East Asia	CHB	Male	-	Unrelated	HapMap02	Yes	O2/O2	1			O1/O1	1	O1/O1	1	O1/O1	1	O1/O1	1	O1	1	O2	1	O2	1	O1	1	O1/O1	1	O1	1	O1	1	O1/O1	1	O1	1	O1	1	O1/O1	1	O2/O2	1	O1	1
NA18606	East Asia	CHB	Male	-	Unrelated	HapMap05	Yes	O1/O2	1			O1/O2	1	O1/O1	1	O1/O2	1	O1/O1	1	O2	1	O2	1	O1	1	O2	1	O1/O1	1	O1	1	O1	1	O1/O2	1	O2	1	O1	1	O1/O1	1	O1/O1	1	O1	1
NA18621	East Asia	CHB	Male	-	Unrelated	HapMap02	Yes	O1/O2	0.998			O1/O2	1	O1/O1	1	O1/O1	1	O1/O1	1	O1	1	O2	1	O2	1	O2	1	O1/O1	0.983	O2	1	O2	1	O1/O2	1	O1	1	O2	1	O1/O1	1	O1/O1	1	O1	1
NA18622	East Asia	CHB	Male	-	Unrelated	HapMap02	Yes	O2/O2	1			O1/O2	1	O1/O1	1	O1/O1	1	O1/O2	1	O1	1	O1	1	O2	1	O2	1	O1/O1	1	O2	1	O1	1	O1/O2	1	O2	1	O1	1	O1/O1	1	O1/O2	1	O1	1
NA18628	East Asia	CHB	Female	-	Unrelated	HapMap05	Yes	O1/O2	1			O1/O2	1	O1/O1	1	O1/O1	1	O1/O1	1	O1/O1	1	O1/O2	1	O1/O1	1	-	-	O1/O1	1	O1/O1	1	O1/O1	1	O1/O1	1	O1/O2	1	O1/O2	1	O1/O1	1	O1/O2	1	O1/O2	1
NA18632	East Asia	CHB	Male	-	Unrelated	HapMap02	Yes	O1/O2	1			O1/O2	1	O1/O2	1	O1/O1	1	O1/O1	1	O1	1	O2	1	O1	1	O2	1	O1/O1	1	O1	1	O1	1	O1/O1	1	O2	1	O1	1	O1/O1	1	O1/O2	1	O1	1
NA18636	East Asia	CHB	Male	-	Unrelated	HapMap02	Yes	O1/O2	1			O2/O2	1	O1/O1	1	O1/O1	1	O1/O1	1	O1	1	O2	1	O1	1	O2	1	ND	0.819	O2	1	O2	1	O1/O2	1	O1	1	O1	1	O1/O1	1	O2/O2	1	O2	1
NA18647	East Asia	CHB	Male	-	Unrelated	HapMap05	Yes	O2/O2	1			O1/O1	1	O1/O1	1	O1/O1	1	O1/O1	1	O1	1	O2	1	O1	1	O2	1	O1/O1	1	O2	1	O1	1	O1/O1	1	O2	1	O1	1	O1/O1	1	O1/O1	1	O1	1
NA18942	East Asia	JPT	Female	-	Unrelated	HapMap02	Yes	O1/O2	1	O2/O2	-	O1/O1	1	O1/O1	1	O1/O1	1	O1/O2	1	O1/O1	1	O1/O1	1	O1/O2	1	-	-	O1/O1	1	O1/O2	1	O1/O1	1	O1/O2	1	O1/O2	1	O1/O2	1	O1/O1	1	O1/O1	1	O1/O2	1
NA18945	East Asia	JPT	Male	-	Unrelated	HapMap02	Yes	O1/O2	1			O1/O1	1	O1/O1	1	O1/O2	1	O1/O1	1	O2	1	O2	1	O1	1	O2	1	O1/O1	1	O1	1	O1	1	O1/O1	0.998	O1	1	O1	1	O1/O1	1	O1/O1	1	O2	1
NA18947	East Asia	JPT	Female	-	Unrelated	HapMap02	Yes	O2/O2	1			O1/O2	1	O1/O2	1	O1/O2	1	O1/O1	1	O2/O2	1	O2/O2	1	O1/O1	1	-	-	O1/O1	0.996	O1/O1	1	O1/O1	1	O1/O1	1	O1/O2	1	O1/O1	1	O1/O1	1	O1/O2	1	O1/O2	1
NA18951	East Asia	JPT	Female	-	Unrelated	HapMap02	Yes	O2/O2	1			O1/O2	1	O1/O1	1	O1/O1	1	O1/O1	1	O1/O2	1	O1/O2	1	O1/O2	1	-	-	O1/O1	1	O1/O1	1	O1/O1	1	O1/O1	1	O1/O2	1	O1/O1	1	ND	-	O1/O2	1	O1/O1	0.968
NA18952	East Asia	JPT	Male	-	Unrelated	HapMap02	Yes	O1/O2	1			O1/O1	1	O1/O1	1	O1/O1	1	O1/O1	1	O2	1	O2	1	O1	1	O2	1	O1/O1	1	O1	1	O1	1	O1/O2	1	O2	1	O1	1	O1/O1	1	O2/O2	1	O1	1
NA18953	East Asia	JPT	Male	-	Unrelated	HapMap02	Yes	O2/O2	1			O2/O2	1	O1/O1	1	O1/O1	1	O1/O1	1	O1	1	O1	1	O1	1	O1	1	O1/O1	0.998	O1	1	O1	1	O1/O2	1	O2	1	O1	1	O1/O1	1	O1/O1	1	O2	1
NA18956	East Asia	JPT	Female	-	Unrelated	HapMap02	Yes	O1/O2	1			O1/O2	1	O1/O1	1	O1/O1	1	ND	-	O1/O1	1	O1/O1	1	O2/O2	1	-	-	ND	0.823	O1/O1	1	O1/O1	1	O1/O1	1	O1/O1	1	O1/O1	1	O1/O1	1	O1/O2	1	ND	0.924
NA18965	East Asia	JPT	Male	-	Unrelated	HapMap02	Yes	O2/O2	1			O1/O2	1	O1/O1	1	O1/O1	1	O1/O1	1	O2	1	O1	1	O2	1	O1	1	O1/O1	1	O2	1	O1	1	O2/O2	1	O2	1	O1	1	ND	-	O1/O2	1	O1	1
NA18970	East Asia	JPT	Male	-	Unrelated	HapMap02	Yes	O2/O2	1			O1/O2	1	O1/O1	1	O1/O1	1	O2/O2	1	O1	1	O2	1	O1	1	O2	1	O1/O1	1	O1	1	O1	1	O1/O2	1	O2	1	O1	1	O1/O1	1	O1/O2	1	O1	1
NA18973	East Asia	JPT	Female	-	Unrelated	HapMap02	Yes	O2/O2	1			O1/O1	1	O1/O2	1	O1/O1	1	O1/O1	1	O1/O2	1	O1/O2	1	O1/O2	1	-	-	ND	0.787	O1/O1	1	O1/O1	1	O1/O1	1	O1/O2	1	O1/O1	1	O1/O1	1	O1/O1	1	ND	0.896
NA18977	East Asia	JPT	Male	-	Unrelated	HapMap05	Yes	O2/O2	1			O1/O2	1	O1/O1	1	O1/O1	1	O1/O1	1	O1	1	O2	1	O1	1	O1	1	O1/O1	1	O1	1	O2	1	O1/O2	1	O2	1	O1	1	O1/O1	1	O1/O2	1	O1	1
NA18987	East Asia	JPT	Female	-	Unrelated	HapMap02	Yes	O1/O2	1			O1/O1	1	O1/O1	1	O1/O1	1	O1/O1	1	O1/O2	1	O1/O2	1	O1/O2	1	-	-	O1/O1	0.998	O1/O2	1	O1/O1	1	O2/O2	1	O2/O2	1	O1/O2	1	O1/O1	1	O1/O2	1	O1/O2	1
NA18990	East Asia	JPT	Male	-	Unrelated	HapMap02	Yes	O2/O2	1			O1/O2	1	O1/O1	1	O1/O1	1	O1/O1	1	O1	1	O2	1	O1	1	O1	1	O1/O1	1	O2	1	O1	1	O1/O2	1	O1	1	O1	1	O1/O1	1	O1/O1	1	O2	1
NA18995	East Asia	JPT	Male	-	Unrelated	HapMap02	Yes	O2/O2	1			O2/O2	1	O1/O1	1	O1/O1	1	O1/O1	1	O1	1	O2	1	O2	1	O2	1	O1/O1	1	O1	1	O1	1	O1/O1	1	O2	1	O1	1	O1/O1	1	O2/O2	1	O1	1
NA19003	East Asia	JPT	Female	-	Unrelated	HapMap02	Yes	O2/O2	1			O1/O2	1	O1/O2	1	O1/O1	1	O1/O1	1	O1/O1	1	O1/O2	1	O1/O1	1	-	-	O1/O1	1	O1/O1	1	O1/O1	1	O1/O2	1	O1/O1	1	O1/O1	1	O1/O1	1	O1/O1	1	O1/O2	1
NA19010	East Asia	JPT	Female	-	Unrelated	HapMap05	Yes	O2/O2	1			O1/O1	1	O1/O1	1	O1/O1	1	ND	-	O1/O2	1	O2/O2	1	O1/O1	1	-	-	O1/O1	1	O1/O2	1	O1/O1	1	O1/O1	1	O1/O1	1	O1/O1	1	O1/O1	1	O1/O1	1	O1/O2	1
NA11829	Europe	CEU	Male	1350	Paternal grandfather	HapMap01	Yes	O1/O1	0.999			O1/O1	1	O1/O1	1	O1/O1	1	O1/O1	1	O2	1	O1	1	O1	1	O2	1	O1/O1	0.998	O2	1	O2	1	O1/O2	1	O1	1	O1	1	O1/O1	1	O1/O2	1	O1	1
NA11830	Europe	CEU	Female	1350	Paternal grandmother	HapMap01	Yes	O1/O2	1			O1/O1	1	O1/O1	1	O1/O1	1	ND	-	O1/O1	1	O2/O2	1	O1/O2	1	-	-	O1/O1	0.997	O1/O2	1	O1/O1	1	O1/O2	0.995	O1/O1	1	O1/O1	1	O1/O1	1	O1/O1	1	O2/O2	1
NA11831	Europe	CEU	Male	1350	Maternal grandfather	HapMap01	Yes	O1/O1	1			O1/O1	1	O1/O1	1	O1/O1	1	O1/O1	1	O1	1	O2	1	O1	1	O1	1	O1/O1	1	O1	1	O1	1	O1/O2	1	O1	1	O1	1	O1/O1	1	O1/O2	1	O2	1
NA11832	Europe	CEU	Female	1350	Maternal grandmother	HapMap01	Yes	O1/O2	1			O1/O1	1	O1/O1	1	O1/O1	1	O2/O2	1	O1/O1	1	O1/O2	1	O1/O1	1	-	-	O1/O1	1	O1/O2	1	O2/O2	1	O1/O1	1	O1/O2	1	O1/O1	1	O1/O1	1	O1/O2	1	O1/O2	1
NA11840	Europe	CEU	Female	1349	Maternal grandmother	HapMap01	Yes	O1/O2	1			O1/O2	1	O1/O1	1	O1/O2	1	O2/O2	1	O1/O2	1	O2/O2	1	O1/O1	1	-	-	O1/O1	0.997	O1/O1	1	O2/O2	1	O1/O2	1	O1/O1	1	O1/O2	1	O1/O1	1	O1/O1	1	O1/O1	1
NA11881	Europe	CEU	Male	1347	Maternal grandfather	HapMap01	Yes	O2/O2	1			O1/O2	1	O1/O2	1	O1/O1	1	O1/O2	1	O1	1	O1	1	O1	1	O2	1	ND	-	O1	1	O1	1	O1/O1	1	O1	1	O1	1	O1/O1	1	O2/O2	1	O2	1
NA11994	Europe	CEU	Male	1362	Maternal grandfather	HapMap01	Yes	O1/O2	1			O1/O2	1	O1/O1	1	O1/O1	1	O1/O2	1	O2	1	O1	1	O1	1	O1	1	O1/O1	1	O1	1	O1	1	O1/O2	1	O1	1	O2	1	O1/O1	1	O1/O2	1	O1	1
NA11995	Europe	CEU	Female	1362	Maternal grandmother	HapMap01	Yes	O2/O2	1			O1/O2	1	O1/O1	1	O1/O1	1	O1/O2	1	O1/O1	1	O2/O2	1	O1/O1	1	-	-	ND	0.864	O1/O2	1	O1/O1	1	O1/O1	1	O1/O2	1	O1/O1	1	O1/O1	1	O1/O2	1	O1/O1	1
NA12004	Europe	CEU	Female	1420	Paternal grandmother	HapMap01	Yes	O2/O2	1			O1/O1	1	O1/O1	1	O1/O1	1	O1/O2	1	O1/O1	1	O1/O2	1	O1/O1	1	-	-	ND	-	O1/O2	1	O1/O1	1	O1/O1	1	O1/O2	1	O1/O1	1	ND	-	O2/O2	1	O1/O1	1
NA12005	Europe	CEU	Male	1420	Maternal grandfather	HapMap01	Yes	O2/O2	1			O1/O1	1	O1/O1	1	O1/O1	1	O1/O2	1	O1	1	O2	1	O2	1	O1	1	O1/O2	1	O2	1	O2	1	O1/O1	1	O2	1	O1	1	O1/O1	1	O1/O2	1	O1	1
NA12043	Europe	CEU	Male	1346	Paternal grandfather	HapMap01	Yes	O1/O1	1			O1/O1	1	O1/O1	1	O1/O1	1	O2/O2	1	O2	1	O2	1	O1	1	O2	1	O1/O1	1	O2	1	O1	1	O1/O2	1	O2	1	O1	1	O1/O1	1	O1/O2	1	O1	1
NA12044	Europe	CEU	Female	1346	Paternal grandmother	HapMap01	Yes	O1/O1	1			O1/O2	1	O1/O2	1	O1/O1	1	O1/O2	1	O1/O1	1	O1/O1	1	O1/O1	1	-	-	O1/O1	0.998	O1/O1	1	O1/O1	1	O1/O2	0.965	O1/O1	1	O1/O1	1	O1/O1	1	O2/O2	1	O1/O1	1
NA12144	Europe	CEU	Male	1334	Paternal grandfather	HapMap01	Yes	O1/O1	0.996			O1/O1	1	O1/O1	1	O1/O1	1	O1/O1	1	O2	1	O2	1	O1	1	O1	1	O1/O2	1	O1	1	O1	1	O1/O2	1	O2	1	O2	1	O1/O1	1	O1/O1	1	O1	1
NA12154	Europe	CEU	Male	1408	Paternal grandfather	HapMap01	Yes	O1/O1	1			O1/O1	1	O1/O1	1	O1/O1	1	O1/O1	1	O2	1	O1	1	O1	1	O1	1	O1/O1	0.999	O1	1	O2	1	O1/O2	0.999	O2	1	O2	1	O1/O1	1	O1/O1	1	O2	1
NA12155	Europe	CEU	Male	1408	Maternal grandfather	HapMap01	Yes	O1/O1	0.998			O1/O1	1	O1/O1	1	O1/O1	1	O1/O2	1	O1	1	O1	1	O1	1	O2	1	O1/O2	1	O2	1	O1	1	O1/O1	0.987	O1	1	O1	1	O1/O1	1	O1/O2	1	O2	1
NA12156	Europe	CEU	Female	1408	Maternal grandmother	HapMap01	Yes	O1/O2	1			O1/O2	1	O1/O1	1	O1/O1	1	O1/O2	1	O1/O1	1	O1/O2	1	O1/O2	1	-	-	O1/O2	1	O1/O2	1	O1/O1	1	O1/O2	1	O1/O1	1	O1/O1	1	O1/O1	1	O2/O2	1	O1/O2	1
NA12234	Europe	CEU	Female	1375	Maternal grandmother	HapMap01	Yes	O1/O2	1			O2/O2	1	O1/O1	1	O1/O1	1	O2/O2	1	O1/O2	1	O1/O1	1	O1/O2	1	-	-	O1/O2	1	O1/O1	1	O1/O2	1	O1/O1	1	O1/O1	1	O1/O2	1	O1/O1	1	O1/O1	1	O2/O2	1
NA12717	Europe	CEU	Female	1358	Paternal grandmother	HapMap01	Yes	O1/O2	1			O1/O1	1	O1/O1	1	O1/O2	1	O1/O2	1	O1/O1	1	O1/O2	1	O1/O1	1	-	-	O1/O1	0.997	O1/O1	1	O1/O2	1	O1/O1	0.995	O2/O2	1	O1/O1	1	O1/O1	1	O1/O1	1	O1/O1	1
NA12750	Europe	CEU	Male	1444	Maternal grandfather	HapMap01	Yes	O1/O2	1			O1/O1	1	O1/O1	1	O2/O2	1	O1/O2	1	O1	1	O2	1	O2	1	O2	1	O1/O1	0.992	O1	1	O1	1	O1/O2	1	O1	1	O1	1	O1/O1	1	O1/O2	1	O2	1
NA12760	Europe	CEU	Male	1447	Paternal grandfather	HapMap01	Yes	O1/O1	1			O1/O1	1	O1/O1	1	O1/O1	1	O1/O1	1	O1	1	O1	1	O1	1	O1	1	O1/O1	0.997	O1	1	O1	1	O1/O1	1	O1	1	O1	1	O1/O1	1	O2/O2	1	O1	1
NA12761	Europe	CEU	Female	1447	Paternal grandmother	HapMap01	Yes	ND	0.917			O1/O1	1	O1/O1	1	O1/O1	1	O1/O1	1	O2/O2	1	O1/O1	1	O1/O1	1	-	-	O1/O2	0.951	O1/O1	1	O1/O1	1	O1/O2	1	O1/O2	1	O1/O2	1	O1/O1	1	O1/O2	1	ND	0.929
NA12762	Europe	CEU	Male	1447	Maternal grandfather	HapMap01	Yes	O1/O1	1			O1/O1	1	O1/O1	1	O1/O1	1	O1/O2	1	O1	1	O1	1	O1	1	O1	1	O1/O1	0.997	O1	1	O1	1	O1/O1	1	O2	1	O1	1	O1/O1	1	O1/O1	1	O1	1
NA12763	Europe	CEU	Female	1447	Maternal grandmother	HapMap01	Yes	O1/O1	0.998			O1/O2	1	O1/O1	1	O1/O1	1	O1/O1	1	O1/O1	1	O1/O2	1	O1/O1	1	-	-	O1/O2	0.965	O1/O2	1	O1/O1	1	O1/O1	1	O1/O1	1	O1/O1	1	O1/O1	1	O2/O2	1	O1/O1	1
NA12812	Europe	CEU	Male	1454	Paternal grandfather	HapMap01	Yes	O2/O2	1			O1/O1	1	O1/O2	1	O1/O1	1	O2/O2	1	O1	1	O2	1	O1	1	O1	1	O1/O1	1	O1	1	O1	1	O1/O1	1	O2	1	O1	1	O1/O1	1	O1/O1	1	O1	1
NA12813	Europe	CEU	Female	1454	Paternal grandmother	HapMap01	Yes	O1/O2	1			O1/O1	1	O1/O1	1	O1/O1	1	O1/O1	1	O1/O1	1	O2/O2	1	O1/O2	1	-	-	O1/O2	1	O1/O2	1	O1/O1	1	O1/O2	1	O1/O1	1	O1/O1	1	O1/O1	1	O1/O1	1	O1/O1	1
NA12814	Europe	CEU	Male	1454	Maternal grandfather	HapMap01	Yes	O1/O1	1			O1/O1	1	O1/O1	1	O1/O1	1	O1/O2	1	O1	1	O1	1	O2	1	O1	1	ND	-	O1	1	O1	1	O1/O2	1	O1	1	O1	1	O1/O1	1	O1/O1	1	O1	1
NA12815	Europe	CEU	Female	1454	Maternal grandmother	HapMap01	Yes	O1/O1	1			O1/O2	1	O1/O1	1	O1/O1	1	O1/O2	1	O1/O1	1	O2/O2	1	O1/O2	1	-	-	O1/O2	1	O1/O1	1	O1/O1	1	O1/O1	1	O1/O2	1	O1/O1	1	O1/O1	1	O1/O1	1	O1/O2	1
NA12872	Europe	CEU	Male	1459	Paternal grandfather	HapMap01	Yes	O1/O2	1			O1/O2	1	O1/O1	1	O1/O1	1	O1/O2	1	O1	1	O2	1	O2	1	O1	1	O1/O2	1	O2	1	O1	1	O1/O2	1	O1	1	O1	1	O1/O1	1	O1/O2	1	O1	1
NA12873	Europe	CEU	Female	1459	Paternal grandmother	HapMap01	Yes	O2/O2	1			O1/O2	1	O1/O1	1	O1/O1	1	O1/O2	1	O1/O1	1	O1/O2	0.999	O1/O1	1	-	-	O1/O1	0.997	O2/O2	1	O1/O2	1	O1/O2	1	O1/O1	1	O1/O1	1	O1/O1	1	O1/O1	1	O1/O1	1
NA12874	Europe	CEU	Male	1459	Maternal grandfather	HapMap01	Yes	O1/O1	0.999			O1/O2	1	O1/O1	1	O1/O1	1	O1/O2	1	O1	1	O1	1	O2	1	O1	1	O1/O2	1	O2	1	O1	1	O1/O2	1	O2	1	O1	1	O1/O1	1	O1/O2	1	O1	1
NA12878	Europe	CEU	Female	1463	Mother	HapMap01	Yes	O1/O1	0.999			O1/O2	1	O1/O2	1	O1/O2	1	O1/O2	1	O1/O1	1	O2/O2	1	O1/O1	1	-	-	O1/O1	1	O1/O2	1	O1/O1	1	O1/O1	1	O1/O1	1	ND	-	O1/O1	1	O1/O2	1	O2/O2	1
NA18500	Africa	YRI	Male	Y004	Child	HapMap03	No					O1/O2	-
NA18501	Africa	YRI	Male	Y004	Father	HapMap03	Yes					O1/O1	-
NA18503	Africa	YRI	Male	Y005	Child	HapMap03	No					O1/O2	-
NA18504	Africa	YRI	Male	Y005	Father	HapMap03	Yes					O1/O1	-
NA18506	Africa	YRI	Male	Y009	Child	HapMap03	No					O2/O2	-
NA18515	Africa	YRI	Male	Y013	Child	HapMap03	No					O1/O2	-
NA18516	Africa	YRI	Male	Y013	Father	HapMap03	Yes					O2/O2	-
NA18521	Africa	YRI	Male	Y016	Child	HapMap03	No					O2/O2	-
NA18522	Africa	YRI	Male	Y016	Father	HapMap03	Yes					O1/O2	-
NA18523	Africa	YRI	Female	Y016	Mother	HapMap03	Yes					O1/O2	-
NA18852	Africa	YRI	Male	Y018	Mother	HapMap03	No					O1/O2	-
NA18853	Africa	YRI	Male	Y018	Father	HapMap03	Yes					O2/O2	-
NA18854	Africa	YRI	Male	Y018	Child	HapMap03	No					O2/O2	-
NA18855	Africa	YRI	Female	Y023	Mother	HapMap03	No					O1/O2	-
NA18856	Africa	YRI	Male	Y023	Father	HapMap03	Yes					O2/O2	-
NA18857	Africa	YRI	Male	Y023	Child	HapMap03	No					O1/O2	-
NA18858	Africa	YRI	Female	Y012	Mother	HapMap03	Yes					O2/O2	-
NA18859	Africa	YRI	Male	Y012	Father	HapMap03	No					O2/O2	-
NA18860	Africa	YRI	Male	Y012	Child	HapMap03	No					O2/O2	-
NA18861	Africa	YRI	Female	Y024	Mother	HapMap03	Yes					O2/O2	-
NA18862	Africa	YRI	Male	Y024	Father	HapMap03	No					O1/O2	-
NA18863	Africa	YRI	Male	Y024	Child	HapMap03	No					O1/O2	-
NA18871	Africa	YRI	Male	Y017	Father	HapMap03	Yes					O2/O2	-
NA18872	Africa	YRI	Male	Y017	Child	HapMap03	No					O2/O2	-
NA18912	Africa	YRI	Female	Y028	Mother	HapMap03	Yes					O1/O2	-
NA18913	Africa	YRI	Male	Y028	Father	HapMap03	No					O2/O2	-
NA18914	Africa	YRI	Male	Y028	Child	HapMap03	No					O2/O2	-
NA19093	Africa	YRI	Female	Y040	Mother	HapMap03	Yes					O1/O1	-
NA19094	Africa	YRI	Female	Y040	Child	HapMap03	No					O1/O2	-
NA19100	Africa	YRI	Female	Y105	Child	HapMap03	No					O2/O2	-
NA19101	Africa	YRI	Male	Y042	Father	HapMap03	No					O2/O2	-
NA19103	Africa	YRI	Male	Y042	Child	HapMap03	No					O2/O2	-
NA19116	Africa	YRI	Female	Y060	Mother	HapMap03	Yes					O1/O1	-
NA19120	Africa	YRI	Male	Y060	Child	HapMap03	No					O1/O2	-
NA19127	Africa	YRI	Female	Y077	Mother	HapMap03	No					O1/O1	-
NA19128	Africa	YRI	Male	Y077	Father	HapMap03	No					O1/O2	-
NA19131	Africa	YRI	Female	Y101	Mother	HapMap03	Yes					O1/O1	-
NA19132	Africa	YRI	Female	Y101	Child	HapMap03	No					O1/O2	-
NA19137	Africa	YRI	Female	Y043	Mother	HapMap03	Yes					O1/O2	-
NA19138	Africa	YRI	Male	Y043	Father	HapMap03	Yes					O1/O1	-
NA19139	Africa	YRI	Male	Y043	Child	HapMap03	No					O1/O1	-
NA19140	Africa	YRI	Female	Y071	Mother	HapMap03	No					O1/O2	-
NA19142	Africa	YRI	Male	Y071	Child	HapMap03	No					O1/O1	-
NA19143	Africa	YRI	Female	Y074	Mother	HapMap03	Yes					O1/O1	-
NA19144	Africa	YRI	Male	Y074	Father	HapMap03	Yes					O1/O2	-
NA19145	Africa	YRI	Male	Y074	Child	HapMap03	No					O1/O1	-
NA19153	Africa	YRI	Male	Y072	Father	HapMap03	Yes					O1/O1	-
NA19154	Africa	YRI	Male	Y072	Child	HapMap03	No					O1/O2	-
NA19159	Africa	YRI	Female	Y056	Mother	HapMap03	Yes					O2/O2	-
NA19161	Africa	YRI	Male	Y056	Child	HapMap03	No					O1/O2	-
NA19172	Africa	YRI	Female	Y047	Mother	HapMap03	Yes					O1/O2	-
NA19173	Africa	YRI	Male	Y047	Child	HapMap03	No					O2/O2	-
NA19192	Africa	YRI	Male	Y112	Father	HapMap03	No					O1/O2	-
NA19193	Africa	YRI	Female	Y112	Mother	HapMap03	No					O2/O2	-
NA19194	Africa	YRI	Male	Y112	Child	HapMap03	No					O2/O2	-
NA19200	Africa	YRI	Male	Y045	Father	HapMap03	Yes					O1/O1	-
NA19201	Africa	YRI	Female	Y045	Mother	HapMap03	Yes					O1/O1	-
NA19202	Africa	YRI	Female	Y045	Child	HapMap03	No					O1/O1	-
NA19203	Africa	YRI	Male	Y048	Father	HapMap03	No					O2/O2	-
NA19205	Africa	YRI	Male	Y048	Child	HapMap03	No					O2/O2	-
NA19208	Africa	YRI	Male	Y051	Child	HapMap03	No					O1/O2	-
NA19210	Africa	YRI	Male	Y050	Father	HapMap03	Yes					O2/O2	-
NA19211	Africa	YRI	Male	Y050	Child	HapMap03	No					O1/O2	-
NA19221	Africa	YRI	Female	Y058	Child	HapMap03	No					O1/O2	-
NA19222	Africa	YRI	Female	Y058	Mother	HapMap03	Yes					O1/O1	-
NA19223	Africa	YRI	Male	Y058	Father	HapMap03	Yes					O2/O2	-
NA19238	Africa	YRI	Female	Y117	Mother	HapMap03	Yes					O2/O2	-
NA19239	Africa	YRI	Male	Y117	Father	HapMap03	Yes					O2/O2	-
NA19313	Africa	LWK	Female	-	Unrelated	HapMapV12	No					O1/O2	-
NA19334	Africa	LWK	Male	-	Unrelated	HapMapV12	Yes					O1/O2	-
NA19384	Africa	LWK	Male	-	Unrelated	HapMapV12	Yes					O1/O2	-
NA19385	Africa	LWK	Male	-	Unrelated	HapMapV12	Yes					O1/O1	-
NA19393	Africa	LWK	Male	-	Unrelated	HapMapV12	Yes					O1/O2	-
NA19436	Africa	LWK	Female	-	Unrelated	HapMapV12	Yes					O2/O2	-
NA19440	Africa	LWK	Female	-	Unrelated	HapMapV12	Yes					O1/O2	-
NA19474	Africa	LWK	Female	-	Unrelated	HapMapV12	Yes					O2/O2	-

## Sheet: S4-Altered amplicon ratios
Supplemental Table S4. Individual samples showing ratios different than 1 for specific ddPCR amplicons. ddPCR results validated four copy number variants (CNV) in four different inversion regions described in the same individuals in the 1000 Genomes Project (1000GP) Phase 3 structural variant (SV) release (Sudmant et al. 2015). Except for HsInv1057, in which the variant described in 1000GP in one…
							1000GP structural variants
Inversion	Individual	Population	Affected amplicon ratio	Ratio	Cause	Genotype	ID	Size (bp)	Type	Affected amplicon	Comments
HsInv1111	NA18970	JPT	B/A and C/A	2	Loss of A in O1chromosome	O1/O2	esv3615865	33562	CNV loss	A	Inversion genotyped by ddPCR BCD with amplicon ratios equal to 1. Loss of A in O1 chromosome leads to O2/O2 genotype in ABC ddPCR.
HsInv0370	NA19118	YRI	B/D and C/D	0.5	Loss of B and C in one chromosome	O2/Del	esv3638142	33121	Deletion	B and C	Deletion already detected by fosmid PEM in NA19240 by Kidd et al. (2008) and validated by ABC10-44764500B19 sequence (AC233581.1). Inversion genotyped based on linkage from the normal chromosome.
	NA19240	YRI	B/D and C/D	0.5	Loss of B and C in one chromosome	O1/Del
HsInv1057	NA12004	CEU	D/C and A/C	0.75	Duplication of C in one chromosome (expected 0.66)	ND	esv3611659	34918	CNV gain	C
	NA19118	YRI	D/C and A/C	1.3 and 0.75	Duplication of C in one chromosome and duplication of D in two chromosomes?	ND	esv3644649	355453	CNV gain	A, C and D	1000GP SV involves a duplication of the whole inversion region, but fails to provide an explanation for the different copy numbers of the 3 amplicons (most likely A=2 copies, C=3 copies and D=4 copies).
HsInv0822	NA19189	YRI	B/A and C/A	0.5	Duplication of A in the only chrX in a male individual	ND (heterozygote male)	-	-	-	-	No SVs affecting A, B or C described. ddPCR results could be explained by IR extension due to duplication of region A after SD2, which would result in an heterozygote genotype in a male (one A copy linked to B and another to C).
HsInv0241	NA18562	CHB	D/C and D/B	1.5	Duplication of D in one chromosome	ND	esv3594809	66426	CNV gain	D	esv3594807 comprising from IR1 to D was predicted also in the same individual but it was not detected by ddPCR (ratios of amplicon A outside this predicted SV with B and C located inside are 1).

## Sheet: S5-Alternative genotypes
Supplemental Table S5. Comparison of ddPCR inversion genotypes with alternative genotyping methods. Methods and references are listed below each inversion name. Discordant genotypes are shaded in black and in all cases ddPCR results are very reliable, with genotype scores between 0.974 and 1. They belong to two inversions: HsInv0241, where discrepancies might be due to previously reported problem…
		Methods able to cross inversion breakpoints						SNP-based predictions
Sample	Population	HsInv0241 (iPCR-NsiI)1	HsInv0389 (iMLPA-NsiI)1	HsInv0395 (HF-PCR)2	HsInv0605 (HF-PCR)2	HsInv0573 (FISH)3,4	HsInv0390 (Southern blot)5	HsInv0786 (inveRsion + PFIDO)6	HsInv0573 (Tag SNPs)4
NA18498	YRI	O1/O2	O2	-	-	-	-	Het or O2/O2	O1/O1
NA18502	YRI	O2/O2	O2/O2	-	-	O1/O1	O1/O1	-	O1/O1
NA18505	YRI	O1/O2	O2/O2	-	-	-	-	O1/O2	O1/O1
NA18507	YRI	O1/O2	O2	O2	O2	O1/O1	O1	O1/O1	O1/O1
NA18508	YRI	O2/O2	O2/O2	-	-	-	-	O1/O1	O1/O1
NA18517	YRI	O1/O2	O2/O2	O1/O2	O2/O2	O1/O1	O1/O1	O1/O1	O1/O1
NA18519	YRI	O1/O1	O2	-	-	-	-	O1/O2	O1/O1
NA18867	YRI	ND	O2/O2	-	-	-	-	O1/O1	O1/O1
NA18870	YRI	ND	O2/O2	-	-	-	-	O1/O2	O1/O1
NA18910	YRI	O2/O2	O2	-	-	-	-	O1/O1	O1/O1
NA19092	YRI	O2/O2	O2	-	-	-	-	-	O1/O1
NA19098	YRI	O2/O2	O2	-	-	-	-	O1/O2	O1/O1
NA19099	YRI	O2/O2	O2/O2	-	-	-	-	O1/O1	O1/O1
NA19102	YRI	O2/O2	O2/O2	-	-	O1/O1	-	O1/O1	O1/O1
NA19108	YRI	O2/O2	O2/O2	-	-	-	-	O1/O1	O1/O1
NA19118	YRI	O1/O2	O2/O2	-	-	-	-	O1/O2	O1/O1
NA19119	YRI	O2/O2	O2	-	-	-	-	O1/O2	O1/O1
NA19129	YRI	O1/O2	O2/O2	O1/O1	O2/O2	O1/O1	O1/O2	O1/O1	O1/O1
NA19130	YRI	O1/O2	O2	-	-	-	-	O1/O1	O1/O1
NA19141	YRI	O1/O1	O2	-	-	-	-	O1/O1	O1/O1
NA19146	YRI	O1/O1	O2	-	-	-	-	O1/O2	O1/O1
NA19150	YRI	O1/O2	O2	-	-	-	-	O1/O1	O1/O1
NA19152	YRI	O1/O2	O2/O2	-	-	-	-	O1/O1	O1/O1
NA19160	YRI	O1/O2	O2	-	-	-	-	O1/O1	O1/O1
NA19171	YRI	O2/O2	O2	-	-	-	-	O1/O1	O1/O1
NA19189	YRI	O2/O2	O2	-	-	-	-	O1/O2	O1/O1
NA19204	YRI	O2/O2	O2/O2	-	-	-	-	O1/O1 or Het	O1/O1
NA19206	YRI	O1/O1	O2/O2	-	-	-	-	O1/O2	O1/O1
NA19207	YRI	O1/O2	O2	-	-	-	-	O1/O1	O1/O1
NA19209	YRI	ND	O2/O2	-	-	-	-	O1/O2	O1/O1
NA19213	YRI	O2/O2	O2	-	-	-	-	O1/O1	O1/O1
NA19240	YRI	O2/O2	O2/O2	O1/O1	O1/O2	O1/O1	O1/O2	O1/O1	-
NA18526	CHB	ND	O1/O1	-	-	-	-	O1/O1	O1/O1
NA18527	CHB	-	-	-	-	-	-	-	O1/O1
NA18537	CHB	O1/O1	O1/O1	-	-	-	-	O1/O2	O1/O1
NA18550	CHB	O1/O2	O1/O1	-	-	-	-	O1/O1	O1/O1
NA18555	CHB	O2/O2	O1/O1	O1/O1	O1/O2	O1/O1	O1/O2	O1/O1	O1/O1
NA18562	CHB	ND	O1	-	-	-	-	O1/O1	O1/O1
NA18563	CHB	O1/O2	O2	-	-	-	-	O1/O1	O1/O1
NA18582	CHB	ND	O1/O1	-	-	-	-	O1/O1	O1/O1
NA18603	CHB	O1/O1	O1	-	-	-	-	O1/O1	O1/O1
NA18606	CHB	-	-	-	-	-	-	-	O1/O1
NA18621	CHB	O1/O2	O1	-	-	-	-	O1/O1	O1/O1
NA18622	CHB	O1/O2	O1	-	-	-	-	O1/O2	O1/O1
NA18628	CHB	-	-	-	-	-	-	O1/O1	O1/O1
NA18632	CHB	O1/O2	O1	-	-	-	-	O1/O1	O1/O1
NA18636	CHB	O2/O2	O1	-	-	-	-	O1/O1	-
NA18647	CHB	-	-	-	-	-	-	O1/O1	O1/O1
NA18942	JPT	O1/O1	O1/O1			O1/O1	O1/O1	O1/O1 or Het	O1/O1
NA18945	JPT	O1/O1	O2	-	-	-	-	O1/O1	O1/O1
NA18947	JPT	O1/O2	O2/O2			O1/O1	O2/O2	O1/O1	O1/O1
NA18951	JPT	O1/O2	O1/O2	-	-	-	-	O1/O1	O1/O1
NA18952	JPT	O1/O1	O2	-	-	-	-	O1/O1	O1/O1
NA18953	JPT	O2/O2	O1	-	-	-	-	O1/O1	O1/O1
NA18956	JPT	O1/O2	O1/O1	O2/O2	O1/O1	O1/O1	O1/O1	O1/O1	-
NA18965	JPT	O1/O2	O2	-	-	-	-	O2/O2	O1/O1
NA18970	JPT	O1/O2	O1	-	-	-	-	O1/O2	O1/O1
NA18973	JPT	O1/O1	O1/O2	-	-	-	-	O1/O1	-
NA18977	JPT	-	-	-	-	-	-	O1/O1	O1/O1
NA18987	JPT	O1/O1	O1/O2	-	-	-	-	Het or O2/O2	O1/O1
NA18990	JPT	O1/O2	O1	-	-	-	-	O1/O1 or Het	O1/O1
NA18995	JPT	O2/O2	O1	-	-	-	-	O1/O1	O1/O1
NA19003	JPT	O1/O2	O1/O1	-	-	-	-	-	O1/O1
NA19010	JPT	-	-	-	-	-	-	O1/O1	O1/O1
NA11829	CEU	O1/O1	O2	O1	-	-	-	Het or O2/O2	O1/O1
NA11830	CEU	O1/O1	O1/O1	O1/O2	-	-	-	O1/O2	O1/O1
NA11831	CEU	O1/O1	O1	O1	-	-	-	O1/O2	O1/O1
NA11832	CEU	O1/O1	O1/O1	ND	-	O1/O1	-	O1/O1	O1/O1
NA11840	CEU	O1/O2	O1/O2	O1/O1	-	O1/O1	-	O1/O2	O1/O1
NA11881	CEU	O1/O2	O1	O1	-	-	-	O1/O1	-
NA11994	CEU	O1/O2	O2	O1	-	-	-	O1/O2	O1/O1
NA11995	CEU	O1/O2	O1/O1	O1/O1	-	-	-	O1/O1	-
NA12004	CEU	O1/O1	O1/O1	O1/O1	-	O1/O1	-	-	-
NA12005	CEU	O1/O1	O1	O2	-	-	-	O1/O1	O1/O2
NA12043	CEU	O1/O1	O2	O1	-	-	-	O1/O2	O1/O1
NA12044	CEU	O1/O2	O1/O1	O1/O1	-	-	-	O1/O2	O1/O1
NA12144	CEU	O1/O1	O2	O1	-	-	-	O1/O1	O1/O2
NA12154	CEU	O1/O1	O2	O1	-	-	-	O1/O2	O1/O1
NA12155	CEU	O1/O1	O1	O1	-	-	-	O1/O1	O1/O2
NA12156	CEU	O1/O2	O1/O1	O1/O2	O1/O2	O1/O2	O1/O2	O1/O2	O1/O2
NA12234	CEU	O2/O2	O1/O2	O1/O2	-	-	-	O1/O1	O1/O2
NA12717	CEU	O1/O1	O1/O1	O1/O1	-	O1/O1	-	-	O1/O1
NA12750	CEU	O1/O1	O1	O2	-	-	-	O1/O2	O1/O1
NA12760	CEU	O1/O1	O1	O1	-	-	-	O1/O1	O1/O1
NA12761	CEU	O1/O1	O2/O2	O1/O1	-	-	-	O1/O2	O1/O2
NA12762	CEU	O1/O1	O1	O1	-	-	-	O1/O1	O1/O1
NA12763	CEU	O1/O2	O1/O1	O1/O1	-	-	-	O1/O1	O1/O2
NA12812	CEU	O1/O1	O1	ND	-	-	-	O1/O1	O1/O1
NA12813	CEU	O1/O1	O1/O1	O1/O2	-	O1/O2	-	O1/O2	O1/O2
NA12814	CEU	O1/O1	O1	O2	-	-	-	O1/O2	-
NA12815	CEU	O1/O2	O1	O1/O2	-	-	-	O1/O1	O1/O2
NA12872	CEU	O1/O2	O1	ND	-	-	-	O1/O1 or Het	O1/O2
NA12873	CEU	O1/O2	O1/O1	O1/O1	-	-	-	O1/O2	O1/O1
NA12874	CEU	O1/O2	O1	O2	-	-	-	O1/O2	O1/O2
NA12878	CEU	O1/O2	O1/O1	O1/O1	O1/O2	O1/O1	O2/O2	O1/O1	O1/O1
Total compared		83	89	34	8	17	11	88	87
NA18500	YRI	O1/O2
NA18501	YRI	O1/O1
NA18503	YRI	O1/O2
NA18504	YRI	O1/O1
NA18506	YRI	O2/O2
NA18515	YRI	O1/O2
NA18516	YRI	O2/O2
NA18521	YRI	O2/O2
NA18522	YRI	O1/O2
NA18523	YRI	O1/O2
NA18852	YRI	O1/O2
NA18853	YRI	O2/O2*
NA18854	YRI	O2/O2
NA18855	YRI	O1/O2
NA18856	YRI	O2/O2
NA18857	YRI	O1/O2
NA18858	YRI	O2/O2
NA18859	YRI	O2/O2
NA18860	YRI	O2/O2
NA18861	YRI	O2/O2
NA18862	YRI	O1/O2
NA18863	YRI	O1/O2
NA18871	YRI	O2/O2
NA18872	YRI	O2/O2
NA18912	YRI	O1/O2
NA18913	YRI	O2/O2
NA18914	YRI	O2/O2
NA19093	YRI	O1/O1
NA19094	YRI	O1/O2
NA19100	YRI	O2/O2
NA19101	YRI	O2/O2
NA19103	YRI	O2/O2
NA19116	YRI	O1/O1
NA19120	YRI	O1/O2
NA19127	YRI	O1/O1
NA19128	YRI	O1/O2
NA19131	YRI	O1/O1
NA19132	YRI	O1/O2
NA19137	YRI	O1/O2
NA19138	YRI	O1/O1
NA19139	YRI	O1/O1
NA19140	YRI	O1/O2
NA19142	YRI	O1/O1
NA19143	YRI	O1/O1
NA19144	YRI	O1/O2
NA19145	YRI	O1/O1
NA19153	YRI	O1/O1
NA19154	YRI	O1/O2
NA19159	YRI	O2/O2
NA19161	YRI	O1/O2
NA19172	YRI	O1/O2
NA19173	YRI	O2/O2
NA19192	YRI	O1/O2
NA19193	YRI	O2/O2
NA19194	YRI	O2/O2
NA19200	YRI	O1/O1
NA19201	YRI	O1/O1
NA19202	YRI	O1/O1
NA19203	YRI	O2/O2
NA19205	YRI	O2/O2
NA19208	YRI	O1/O2
NA19210	YRI	O2/O2
NA19211	YRI	O2/O2
NA19221	YRI	O1/O2
NA19222	YRI	O1/O1
NA19223	YRI	O2/O2
NA19238	YRI	O2/O2
NA19239	YRI	O2/O2
NA19313	LWK	O1/O2
NA19334	LWK	O1/O2
NA19384	LWK	O2/O2*
NA19385	LWK	O1/O1*
NA19393	LWK	O2/O2*
NA19436	LWK	O2/O2
NA19440	LWK	O2/O2*
NA19474	LWK	O2/O2
REFERENCES
1. Giner-Delgado C, Villatoro S, Lerga-Jaso J, Gaya-Vidal M, Oliva M, Castellano D, Pantano L, Bitarello B, Izquierdo D, Noguera I, et al. 2019. Evolutionary and functional impact of polymorphic inversions in the human genome. Nat. Commun. 10: 4222.
2. This work.
3. Antonacci F, Kidd JM, Marques-Bonet T, Ventura M, Siswara P, Jiang Z, Eichler EE. 2009. Characterization of six human disease-associated inversion polymorphisms. Hum. Mol. Genet. 18: 2555–66.
4. Steinberg KM, Antonacci F, Sudmant PH, Kidd JM, Campbell CD, Vives L, Malig M, Scheinfeldt L, Beggs W, Ibrahim M, et al. 2012. Structural diversity and African origin of the 17q21.31 inversion polymorphism. Nat. Genet. 44: 872–80.
5. Beck CR, Carvalho CMB, Banser L, Gambin T, Stubbolo D, Yuan B, Sperle K, McCahan SM, Henneke M, Seeman P, et al. 2015. Complex genomic rearrangements at the PLP1 locus include triplication and quadruplication. ed. N.B. Spinner. PLoS Genet. 11: e1005050.
6. González JR, Cáceres A, Esko T, Cuscó I, Puig M, Esnaola M, Reina J, Siroux V, Bouzigon E, Nadif R, et al. 2014. A common 16p11.2 inversion underlies the joint susceptibility to asthma and obesity. Am. J. Hum. Genet. 94: 361–72.

## Sheet: S6-Fst
Supplemental Table S6. Population differentiation results. FST values were calculated with Weir and Cockerham’s estimator for each pair of populations (YRI, EAS and CEU) and the three populations together (GLB). Quantile indicates the position of the observed FST within the distribution of FST values for 10,000 SNPs (NA, not calculated for Chr Y or pairwise comparisons involving one population wi…
Inversion	Chr	YRI-EAS		YRI-CEU		EAS-CEU		GLB
		FST	Quantile	FST	Quantile	FST	Quantile	FST	Quantile
HsInv0228	1	0.124219	0.665733	0.0355368	0.461354	0.299172	0.939206	0.161056	0.725527
HsInv0241	2	0.0753349	0.548145	0.259992	0.869613	0.0542597	0.584942	0.137774	0.660434
HsInv0290	7	-0.0107594	0.148385	-0.00178934	0.253575	-0.0133848	0.116688	-0.00843486	0.0489951
HsInv0370	16	0.196775	0.768823	0.138922	0.715828	-0.0111588	0.171683	0.137356	0.668033
HsInv0382	20	0.0634092	0.513849	0.104572	0.652035	0.303889	0.939806	0.18008	0.752525
HsInv0389	X	0.782671	0.988101	0.85989	0.9966	-0.0231987	0.189681	0.701191	0.989401
HsInv0390	X	0.0870595	0.526647	0.140212	0.664734	-0.0262114	0.162484	0.0712269	0.381562
HsInv0395	X	0.112208	0.566743	0.310924	0.833217	0.0276687	0.446055	0.170406	0.614139
HsInv0416	Y	0.313911	NA	0.64511	NA	0.118367	NA	0.38032	NA
HsInv0573	17	NA	NA	0.202	NA	0.196	NA	0.196867	0.79502
HsInv0605	X	0.145253	0.615638	0.00649351	0.328367	0.032929	0.473153	0.0617766	0.357164
HsInv0608	X	0.324385	0.819618	0.0413534	0.445755	0.108715	0.653335	0.161358	0.60104
HsInv0786	16	-0.0148988	0.0739926	-0.00837833	0.19588	-0.0109	0.173383	-0.0113314	0.0338966
HsInv0822	X	-0.0245548	0.154285	0.0816327	0.550345	0.056651	0.537246	0.0380652	0.275872
HsInv0830	X	0.250105	0.751225	0.355601	0.863414	-0.0103093	0.284672	0.249624	0.747725
HsInv1057	6	0.107	NA	0.109	NA	NA	NA	0.107926	0.580342
HsInv1111	8	0.165607	0.723128	0.165607	0.766223	-0.0188108	0.0122988	0.107677	0.589641
HsInv1126	X	0.0148179	0.334067	-0.0297808	0.0931907	0.0212797	0.417858	0.00102662	0.143986

## Sheet: S7-LD
Supplemental Table S7. Maximum linkage disequilibrium (LD) and number of fixed and shared SNPs in 15 newly genotyped inversions. LD was calculated for all biallelic SNPs and small indels within the inverted region plus 1 Mb of flanking sequence outside the breakpoints. SNPs within the inverted region were classified based on the 1000GP Phase 3 genotype data as fixed, shared or private to one of t…
	Maximum LD (r2)				SNP count (additional unreliable SNPs)
Inversion	Global	YRI	EAS	CEU	Fixed	Private	Shared
HsInv0228	0.21	0.28	0.4	0.36	0	14 (3)	12 (3)
HsInv0290	0.31	0.63	0.56	1	0	2668 (2938)	701 (1057)
HsInv0370	0.48	0.61	0.64	0.62	0	94 (49)	38 (18)
HsInv0382	0.44	0.68	0.88	0.54	0	167 (915)	28 (227)
HsInv0390	0.29	0.48	0.72	0.56	0	133 (51)	52 (37)
HsInv0395	0.62	0.4	0.92	1	0	20 (6)	10 (4)
HsInv0573	1	NA	NA	1	1803 (655)	2330 (890)	0 (9)
HsInv0605	0.27	0.48	0.34	1	0	243 (414)	15 (31)
HsInv0608	0.31	0.42	1	0.64	0	104 (110)	52 (77)
HsInv0786	0.79	0.78	0.76	1	0	355 (614)	73 (231)
HsInv0822	0.27	0.52	0.41	0.55	0	90 (45)	36 (19)
HsInv0830	0.53	0.53	0.45	0.45	0	36 (31)	13 (15)
HsInv1057	1	1	NA	NA	36 (37)	939 (1131)	0 (5)
HsInv1111	0.32	0.51	0.47	0.53	0	256 (86)	240 (127)
HsInv1126	0.21	0.36	0.48	0.51	0	18 (3)	10 (1)

## Sheet: S8-Recurrence
Suppplemental Table S8. Conservative estimate of recurrence events in newly analyzed inversions. IR/Inv ratio corresponds to the ratio between IR and inverted region sizes shown in Table 1 and Supplemental Table S1. Events marked in bold and dark blue are considered the original inversion event, with the direction of the inversion indicated as >. For all other events, the number of chromosomes su…
						Number of recurrent chromosomes
Inversion	Chr	IR/Inv ratio	Ancestral orientation	Inversion events	Event type	YRI	CEU	EAS	Total	SNPs
HsInv0228	1	3.84642	O2	3	O2 > O1				-	21
					O1 > O2	5	1		6
					O2 > O1	1			1
HsInv1057	6	0.204742	O1	1	O1 > O2				-	700
HsInv0290	7	0.133143	O1	3	O1 > O2				-	100/100*
					O1 > O2		1	2	3
					O1 > O2	1		1	2
HsInv1111	8	3.13038	O2	4	O2 > O1				-	351
					O2 > O1	3			3
					O2 > O1		4		4
					O2 > O1		5	9	14
HsInv0370	16	4.18515	O1	5	O1 > O2				-	89
					O1 > O2	2	2	1	5
					O1 > O2	2			2
					O1 > O2	3	2	2	7
					O1 > O2		1		1
HsInv0786	16	0.78199	O1	4	O1 > O2				-	246
					O1 > O2	2			2
					O1 > O2	1		2	3
					O2 > O1			1	1
HsInv0573	17	0.52784	O1	1	O1 > O2				-	2933
HsInv0382	20	0.56072	O1	2	O1 > O2				-	119
					O1 > O2	2			2
HsInv1126	X	3.44189	O1	3	O1 > O2				-	20
					O1 > O2	3	4	2	9
					O1 > O2	2			2
HsInv0605	X	0.489685	O1	2	O1 > O2				-	160
					O1 > O2	8			8
HsInv0395	X	2.05932	O1	3	O1 > O2				-	19
					O2 > O1	1			1
					O1 > O2	3			3
HsInv0390	X	1.12964	O1	4	O1 > O2				-	112
					O2 > O1		6	1	7
					O1 > O2	1		9	10
					O1 > O2	2			2
HsInv0822	X	0.688975	O1	4	O1 > O2				-	75
					O1 > O2	2	2	1	5
					O1 > O2	11			11
					O1 > O2	1		1	2
HsInv0830	X	1.63832	O2	3	O2 > O1				-	42
					O1 > O2		2	4	6
					O2 > O1	7	1		8
HsInv0608	X	0.747922	O1	3	O1 > O2				-	72
					O1 > O2	1	4	3	8
					O1 > O2	3	4		7
HsInv0416	Y	0.48848	O2	4	O2 > O1				-	NA
					O2 > O1		11		11
					O1 > O2			1	1
					O1 > O2		1		1
* HsInv0290 inversion is 0.74 Mb long and was analyzed using the 100 SNPs closest to each breakpoint within the inverted segment to avoid possible phasing errors. Haplotype relationships for each of the breakpoints were analyzed independently and then results were combined by considering as recurrent events only those consistent between both breakpoints.

## Sheet: S9-LCLs
Supplemental Table S9. Effect of inversions on gene expression of lymphoblastoid cell lines from the Geuvadis project. Association of 17 inversions with expression levels of both genes and transcripts in cis (± 1 Mb) was done considering 59 experimentally-genotyped individuals (experimental) and 387 Geuvadis individuals of European origin for 5 inversions in which genotypes could be imputed throu…
Inversion	Inversion genotype	Gene/Transcript (GENCODE version 26)	Gene/Transcript symbol	Gene type	Slope	P value	Q value (FDR)	Potential lead eQTL
Gene-level analysis
HsInv0382	Experimental	ENSG00000175170.14	FAM182B	Protein coding	-0.837849	0.000169077	0.0219148	No
HsInv0573	Experimental	ENSG00000262539.1	RP11-259G18.3	Pseudogene	1.47153	1.99779e-07	0.000103577	Yes
HsInv0573	Experimental	ENSG00000214425.7	LRRC37A4P	Pseudogene	-1.0245	3.80228e-06	0.000985661	Yes
HsInv0573	Experimental	ENSG00000264070.1	DND1P1	Pseudogene	1.30625	8.45664e-06	0.00146147	Yes
HsInv0573	Experimental	ENSG00000214401.4	KANSL1-AS1	Antisense	1.11608	0.000389022	0.0403383	Yes
HsInv0290	Imputed (rs182433657)	ENSG00000159904.11	ZNF890P	Pseudogene	0.595922	0.000134119	0.000793215	No
HsInv0290	Imputed (rs182433657)	ENSG00000146576.12	C7orf26	Protein coding	0.237974	0.000187788	0.0010662	No
HsInv0290	Imputed (rs182433657)	ENSG00000178397.12	FAM220A	Protein coding	-0.343857	0.000370883	0.00202477	No
HsInv0290	Imputed (rs182433657)	ENSG00000136247.14	ZDHHC4	Protein coding	0.344332	0.00121099	0.00613895	No
HsInv0290	Imputed (rs182433657)	ENSG00000086232.12	EIF2AK1	Protein coding	0.424183	0.0014515	0.00710446	No
HsInv0290	Imputed (rs182433657)	ENSG00000122674.11	CCZ1	Protein coding	0.429868	0.00914246	0.0332744	No
HsInv0290	Imputed (rs182433657)	ENSG00000187953.10	PMS2CL	Pseudogene	-0.302474	0.0129305	0.0436996	No
HsInv0395	Imputed (rs5914318)	ENSG00000227486.1	RP13-188A5.1	LincRNA	-0.590225	1.59038e-31	3.22489e-30	No
HsInv0395	Imputed (rs5914318)	ENSG00000083750.12	RRAGB	Protein coding	-0.194853	7.08198e-13	6.70155e-12	No
HsInv0395	Imputed (rs5914318)	ENSG00000102349.17	KLF8	Protein coding	-0.268216	1.45e-07	1.0835e-06	No
HsInv0395	Imputed (rs5914318)	ENSG00000067445.20	TRO	Protein coding	0.172328	0.00329286	0.0141635	No
HsInv0573	Imputed (rs569562314)	ENSG00000214425.7	LRRC37A4P	Pseudogene	-1.27783	4.9762e-131	7.06333e-129	Yes
HsInv0573	Imputed (rs569562314)	ENSG00000262539.1	RP11-259G18.3	Pseudogene	1.28419	4.93955e-75	3.50566e-73	Yes
HsInv0573	Imputed (rs569562314)	ENSG00000263503.1	MAPK8IP1P2	Pseudogene	1.21081	1.07549e-69	5.08858e-68	Yes
HsInv0573	Imputed (rs569562314)	ENSG00000214401.4	KANSL1-AS1	Antisense	1.17883	1.9705e-61	6.99243e-60	Yes
HsInv0573	Imputed (rs569562314)	ENSG00000120071.13	KANSL1	Protein coding	0.694769	1.57296e-46	4.46539e-45	Yes
HsInv0573	Imputed (rs569562314)	ENSG00000204650.14	LINC02210	Pseudogene	0.648321	1.0597e-37	2.50694e-36	Yes
HsInv0573	Imputed (rs569562314)	ENSG00000238083.7	LRRC37A2	Protein coding	0.783079	2.59251e-27	4.59983e-26	Yes
HsInv0573	Imputed (rs569562314)	ENSG00000264070.1	DND1P1	Pseudogene	0.78001	2.94009e-26	4.63692e-25	No
HsInv0573	Imputed (rs569562314)	ENSG00000159314.11	ARHGAP27	Protein coding	-0.410007	2.66766e-25	3.78654e-24	Yes
HsInv0573	Imputed (rs569562314)	ENSG00000261575.2	RP11-259G18.1	Pseudogene	0.637267	1.46373e-14	1.88877e-13	Yes
HsInv0573	Imputed (rs569562314)	ENSG00000108379.9	WNT3	Protein coding	0.559967	7.00667e-14	8.28786e-13	No
HsInv0573	Imputed (rs569562314)	ENSG00000185829.17	ARL17A	Protein coding	0.590982	1.74288e-13	1.90299e-12	No
HsInv0573	Imputed (rs569562314)	ENSG00000280022.1	RP11-707O23.1	TEC	0.62797	4.70795e-13	4.77327e-12	Yes
HsInv0573	Imputed (rs569562314)	ENSG00000073969.18	NSF	Protein coding	0.325061	3.02082e-11	2.67989e-10	No
HsInv0573	Imputed (rs569562314)	ENSG00000236234.1	AC091132.1	Antisense	-0.334326	3.97141e-06	2.81856e-05	No
HsInv0573	Imputed (rs569562314)	ENSG00000267246.1	RP11-798G7.7	processed_transcript	-0.352623	3.94671e-05	0.000254639	No
HsInv0573	Imputed (rs569562314)	ENSG00000176681.14	LRRC37A	Protein coding	0.292215	0.000672167	0.00353366	No
HsInv0573	Imputed (rs569562314)	ENSG00000260075.1	NSFP1	Pseudogene	-0.280061	0.00212422	0.0100086	No
HsInv0573	Imputed (rs569562314)	ENSG00000267198.1	RP11-798G7.6	LincRNA	-0.282373	0.00218587	0.0100086	No
HsInv0573	Imputed (rs569562314)	ENSG00000108433.16	GOSR2	Protein coding	0.129421	0.00536876	0.0224134	No
HsInv0573	Imputed (rs569562314)	ENSG00000184361.12	SPATA32	Protein coding	-0.21271	0.00674176	0.0258633	No
HsInv0573	Imputed (rs569562314)	ENSG00000225190.10	PLEKHM1	Protein coding	0.0849448	0.00877008	0.0327591	No
HsInv0786	Imputed (rs153106)	ENSG00000184110.14	EIF3C	Protein coding	0.337551	7e-09	5.85338e-08	No
HsInv0786	Imputed (rs153106)	ENSG00000184730.10	APOBR	Protein coding	0.21467	1.44162e-07	1.0835e-06	No
HsInv0786	Imputed (rs153106)	ENSG00000176953.12	NFATC2IP	Protein coding	0.113706	2.82607e-05	0.000191019	Yes
HsInv0786	Imputed (rs153106)	ENSG00000103472.9	RRN3P2	Pseudogene	0.242453	5.60046e-05	0.000345627	No
HsInv0786	Imputed (rs153106)	ENSG00000178952.10	TUFM	Protein coding	0.0863068	0.00242643	0.0107629	No
HsInv0786	Imputed (rs153106)	ENSG00000197272.2	IL27	Protein coding	0.149938	0.00557288	0.0226008	No
HsInv0786	Imputed (rs153106)	ENSG00000188603.18	CLN3	Protein coding	0.163881	0.00598488	0.0235974	No
HsInv0786	Imputed (rs153106)	ENSG00000260853.1	RP11-264B17.2	Antisense	0.0909898	0.0101339	0.0359607	No
HsInv0786	Imputed (rs153106)	ENSG00000196296.13	ATP2A1	Protein coding	0.156283	0.0105682	0.0365872	No
Transcript-level analysis
HsInv0573	Experimental	ENST00000639356.1	KANSL1-010	Protein coding	1.57619	3.99519e-13	1.12505e-09	Yes
HsInv0573	Experimental	ENST00000580257.1	MAPK8IP1P2-001	Pseudogene	1.47463	1.46257e-10	2.0593e-07	Yes
HsInv0573	Experimental	ENST00000571422.1	RP11-259G18.3-001	Pseudogene	1.53617	1.729e-09	1.623e-06	Yes
HsInv0573	Experimental	ENST00000583740.5	LINC02210-007	Pseudogene	1.37664	2.27184e-07	0.000159938	Yes
HsInv0573	Experimental	ENST00000579913.5	LRRC37A4P-002	Pseudogene	-1.08085	2.88491e-05	0.0162478	Yes
HsInv0573	Experimental	ENST00000333412.3	LRRC37A2-201	Protein coding	1.18997	4.14141e-05	0.019437	Yes
HsInv0290	Imputed (rs182433657)	ENST00000344417.9	C7orf26-001	Protein coding	0.270926	0.000201936	0.00245407	No
HsInv0290	Imputed (rs182433657)	ENST00000422825.1	ZNF815P-007	Pseudogene	-0.581225	0.000313724	0.00350512	No
HsInv0290	Imputed (rs182433657)	ENST00000396707.6	ZDHHC4-201	Protein coding	0.546195	0.000641897	0.00653888	No
HsInv0290	Imputed (rs182433657)	ENST00000223029.7	AIMP2-001	Protein coding	-0.195047	0.0012568	0.0117647	No
HsInv0290	Imputed (rs182433657)	ENST00000474507.1	CCZ1-002	Protein coding	0.504836	0.0015025	0.0135167	No
HsInv0290	Imputed (rs182433657)	ENST00000616824.1	FAM220A-201	Protein coding	-0.428404	0.00229095	0.0191199	No
HsInv0290	Imputed (rs182433657)	ENST00000199389.10	EIF2AK1-001	Protein coding	0.413431	0.00304033	0.0242074	No
HsInv0290	Imputed (rs182433657)	ENST00000348035.8	RAC1-001	Protein coding	0.242627	0.00318115	0.0250408	No
HsInv0290	Imputed (rs182433657)	ENST00000496017.1	ZDHHC4-008	Protein coding	0.433442	0.00502805	0.0362807	No
HsInv0290	Imputed (rs182433657)	ENST00000626257.2	CCZ1B-201	Protein coding	-0.434817	0.00682482	0.0473601	No
HsInv0395	Imputed (rs5914318)	ENST00000452532.1	RP13-188A5.1-001	LincRNA	-0.582945	1.70741e-29	1.18273e-27	No
HsInv0395	Imputed (rs5914318)	ENST00000374941.8	RRAGB-002	Protein coding	-0.189897	1.11351e-09	2.96666e-08	No
HsInv0395	Imputed (rs5914318)	ENST00000374928.7	KLF8-201	Protein coding	-0.303909	1.96245e-08	4.53132e-07	No
HsInv0395	Imputed (rs5914318)	ENST00000468660.5	KLF8-001	Protein coding	-0.255202	5.81457e-06	9.36691e-05	No
HsInv0395	Imputed (rs5914318)	ENST00000262850.7	RRAGB-001	Protein coding	-0.188371	0.00139116	0.0126798	No
HsInv0395	Imputed (rs5914318)	ENST00000487482.5	MAGED2-008	Protein coding	0.165432	0.0030043	0.0241987	No
HsInv0573	Imputed (rs569562314)	ENST00000579913.5	LRRC37A4P-002	Pseudogene	-1.25532	6.44754e-118	4.46623e-115	Yes
HsInv0573	Imputed (rs569562314)	ENST00000581296.2	LRRC37A4P-001	Pseudogene	-1.06313	3.5919e-101	1.24406e-98	Yes
HsInv0573	Imputed (rs569562314)	ENST00000571422.1	RP11-259G18.3-001	Pseudogene	1.24873	1.85342e-96	4.27957e-94	Yes
HsInv0573	Imputed (rs569562314)	ENST00000580257.1	MAPK8IP1P2-001	Pseudogene	1.19267	1.34247e-90	2.32483e-88	Yes
HsInv0573	Imputed (rs569562314)	ENST00000639356.1	KANSL1-010	Protein coding	1.1881	4.9157e-87	6.81024e-85	Yes
HsInv0573	Imputed (rs569562314)	ENST00000398275.4	KANSL1-AS1-001	Antisense	1.15833	6.10568e-60	7.04904e-58	Yes
HsInv0573	Imputed (rs569562314)	ENST00000583740.5	LINC02210-007	Pseudogene	0.965586	1.14682e-46	1.13487e-44	Yes
HsInv0573	Imputed (rs569562314)	ENST00000333412.3	LRRC37A2-201	Protein coding	0.981587	3.68535e-45	3.19107e-43	Yes
HsInv0573	Imputed (rs569562314)	ENST00000572638.1	LRRC37A2-002	Protein coding	0.730238	1.95384e-26	1.12786e-24	No
HsInv0573	Imputed (rs569562314)	ENST00000638902.1	KANSL1-033	Protein coding	0.817765	8.32855e-25	4.43786e-23	Yes
HsInv0573	Imputed (rs569562314)	ENST00000585122.5	LINC02210-005	Pseudogene	0.676138	7.05871e-19	3.49257e-17	Yes
HsInv0573	Imputed (rs569562314)	ENST00000580842.1	DND1P1-001	Pseudogene	0.568117	5.54108e-17	2.49207e-15	No
HsInv0573	Imputed (rs569562314)	ENST00000455565.5	LINC02210-004	Pseudogene	0.5343	5.75617e-17	2.49207e-15	Yes
HsInv0573	Imputed (rs569562314)	ENST00000582491.5	LINC02210-017	Pseudogene	0.620292	1.5124e-14	5.82025e-13	Yes
HsInv0573	Imputed (rs569562314)	ENST00000398238.8	NSF-001	Protein coding	0.334896	4.5963e-14	1.67572e-12	No
HsInv0573	Imputed (rs569562314)	ENST00000572991.5	ARL17B-005	Protein coding	-0.540316	2.50012e-12	8.65921e-11	No
HsInv0573	Imputed (rs569562314)	ENST00000576870.5	KANSL1-005	Protein coding	-0.312679	8.26371e-12	2.72586e-10	No
HsInv0573	Imputed (rs569562314)	ENST00000393465.7	LRRC37A-003	Protein coding	0.547207	3.43142e-11	1.08043e-09	No
HsInv0573	Imputed (rs569562314)	ENST00000570618.5	ARL17B-001	Protein coding	0.562862	2.32694e-10	7e-09	No
HsInv0573	Imputed (rs569562314)	ENST00000225512.5	WNT3-001	Protein coding	0.450909	2.59631e-09	6.66101e-08	No
HsInv0573	Imputed (rs569562314)	ENST00000576739.2	KANSL1-008	Protein coding	0.466918	4e-09	9.93403e-08	Yes
HsInv0573	Imputed (rs569562314)	ENST00000592428.1	LINC02210-012	Pseudogene	0.469428	1.48315e-08	3.5427e-07	No
HsInv0573	Imputed (rs569562314)	ENST00000458392.1	FAM215B-001	LincRNA	-0.343814	3.22816e-08	7.21341e-07	No
HsInv0573	Imputed (rs569562314)	ENST00000336125.5	ARL17A-001	Protein coding	0.322746	3.58444e-08	7.75923e-07	No
HsInv0573	Imputed (rs569562314)	ENST00000585761.1	RP11-798G7.6-001	LincRNA	0.399659	6.51e-07	1.25266e-05	No
HsInv0573	Imputed (rs569562314)	ENST00000376922.6	ARHGAP27-001	Protein coding	-0.343928	7.08288e-07	1.32604e-05	Yes
HsInv0573	Imputed (rs569562314)	ENST00000625174.1	RP11-707O23.1-001	TEC	0.409688	1.34965e-06	2.46028e-05	No
HsInv0573	Imputed (rs569562314)	ENST00000639822.1	RP11-156P1.2-002	Protein coding	-0.350455	2.81014e-06	4.99126e-05	No
HsInv0573	Imputed (rs569562314)	ENST00000572634.1	KANSL1-AS1-002	Antisense	0.366645	5.10672e-06	8.77196e-05	No
HsInv0573	Imputed (rs569562314)	ENST00000580655.1	LINC02210-014	Pseudogene	0.387499	7.3099e-06	0.000115082	Yes
HsInv0573	Imputed (rs569562314)	ENST00000570002.2	RP11-259G18.1-002	Pseudogene	0.323878	1.26162e-05	0.000194206	No
HsInv0573	Imputed (rs569562314)	ENST00000589868.1	LINC02210-015	Pseudogene	0.265579	8.91799e-05	0.00121128	Yes
HsInv0573	Imputed (rs569562314)	ENST00000320254.5	LRRC37A-001	Protein coding	0.323825	0.000163716	0.00210012	No
HsInv0573	Imputed (rs569562314)	ENST00000580220.2	LINC02210-003	Pseudogene	0.334466	0.000179009	0.00225455	No
HsInv0573	Imputed (rs569562314)	ENST00000570034.1	NSFP1-001	Pseudogene	-0.311442	0.000194644	0.00240769	No
HsInv0573	Imputed (rs569562314)	ENST00000432791.6	KANSL1-002	Protein coding	0.300095	0.000222821	0.00261608	Yes
HsInv0573	Imputed (rs569562314)	ENST00000433601.1	AC091132.1-001	Antisense	-0.270236	0.000286438	0.00325273	No
HsInv0573	Imputed (rs569562314)	ENST00000639150.1	KANSL1-031	Protein coding	0.276635	0.000361135	0.00390874	Yes
HsInv0573	Imputed (rs569562314)	ENST00000580205.1	PLEKHM1-006	Protein coding	-0.26994	0.000391596	0.00417323	No
HsInv0573	Imputed (rs569562314)	ENST00000591950.1	RP11-798G7.6-002	LincRNA	0.303238	0.000544612	0.00571598	No
HsInv0573	Imputed (rs569562314)	ENST00000576629.5	LRRC37A2-001	Protein coding	-0.288782	0.000751492	0.00754436	No
HsInv0573	Imputed (rs569562314)	ENST00000496930.5	LRRC37A-002	Protein coding	-0.287422	0.000830414	0.00821758	No
HsInv0573	Imputed (rs569562314)	ENST00000640092.1	KANSL1-030	Protein coding	0.270622	0.000975871	0.00952097	No
HsInv0573	Imputed (rs569562314)	ENST00000450673.3	ARL17B-002	Protein coding	0.268336	0.00100813	0.0096991	No
HsInv0573	Imputed (rs569562314)	ENST00000428638.5	ARHGAP27-202	Protein coding	-0.147524	0.00162383	0.0144209	No
HsInv0573	Imputed (rs569562314)	ENST00000290470.3	ARHGAP27-201	Protein coding	-0.146137	0.00165163	0.0144623	No
HsInv0573	Imputed (rs569562314)	ENST00000574655.6	KANSL1-032	Protein coding	0.225473	0.00167024	0.0144623	No
HsInv0573	Imputed (rs569562314)	ENST00000585677.1	LINC02210-009	Pseudogene	0.280122	0.00228264	0.0191199	No
HsInv0573	Imputed (rs569562314)	ENST00000518170.1	EFCAB13-006	Protein coding	0.24886	0.00239797	0.0197748	No
HsInv0573	Imputed (rs569562314)	ENST00000574590.6	KANSL1-001	Protein coding	0.26699	0.00347655	0.0270586	No
HsInv0573	Imputed (rs569562314)	ENST00000586084.1	PLEKHM1-016	Protein coding	0.237222	0.0037059	0.0282098	No
HsInv0573	Imputed (rs569562314)	ENST00000592695.1	HEXIM2-003	Protein coding	-0.232902	0.00464618	0.0349829	No
HsInv0573	Imputed (rs569562314)	ENST00000572904.6	KANSL1-013	Protein coding	0.159566	0.00485311	0.0358169	No
HsInv0573	Imputed (rs569562314)	ENST00000575068.5	NSF-005	Protein coding	0.212254	0.00486036	0.0358169	No
HsInv0573	Imputed (rs569562314)	ENST00000290158.8	KPNB1-001	Protein coding	0.0939689	0.00638987	0.0456318	No
HsInv0573	Imputed (rs569562314)	ENST00000638275.1	KANSL1-009	Protein coding	0.122007	0.0068677	0.0473601	No
HsInv0573	Imputed (rs569562314)	ENST00000307275.7	HEXIM2-001	Protein coding	0.232287	0.00690536	0.0473601	No
HsInv0573	Imputed (rs569562314)	ENST00000518646.5	EFCAB13-010	Protein coding	-0.223853	0.00733629	0.0493386	No
HsInv0605	Imputed (rs7887607)	ENST00000593751.7	FAM156B-001	Protein coding	-0.161969	0.0013894	0.0126798	No
HsInv0786	Imputed (rs153106)	ENST00000566946.5	ATXN2L-011	Protein coding	-0.380435	3.34628e-38	2.57553e-36	No
HsInv0786	Imputed (rs153106)	ENST00000336783.8	ATXN2L-003	Protein coding	0.386471	8.97843e-27	5.65399e-25	No
HsInv0786	Imputed (rs153106)	ENST00000565099.1	EIF3C-016	Protein coding	-0.550672	1.92513e-16	7.84438e-15	Yes
HsInv0786	Imputed (rs153106)	ENST00000566866.5	EIF3C-010	Protein coding	0.283171	3.75529e-10	1.08388e-08	No
HsInv0786	Imputed (rs153106)	ENST00000569005.5	EIF3C-014	Protein coding	0.344867	1.05018e-09	2.90985e-08	No
HsInv0786	Imputed (rs153106)	ENST00000562583.5	ATXN2L-009	Protein coding	0.188261	4.73748e-08	9.94445e-07	No
HsInv0786	Imputed (rs153106)	ENST00000564243.5	EIF3C-007	Protein coding	0.200352	8.66819e-08	1.766e-06	No
HsInv0786	Imputed (rs153106)	ENST00000563314.5	ATXN2L-012	Protein coding	-0.269431	5.03436e-07	9.96377e-06	No
HsInv0786	Imputed (rs153106)	ENST00000569217.1	TUFM-002	Protein coding	-0.152945	5.192e-06	8.77196e-05	No
HsInv0786	Imputed (rs153106)	ENST00000564580.5	RRN3P2-001	Pseudogene	0.285676	5.77936e-06	9.36691e-05	No
HsInv0786	Imputed (rs153106)	ENST00000431282.2	APOBR-201	Protein coding	0.294746	1.42653e-05	0.000214818	Yes
HsInv0786	Imputed (rs153106)	ENST00000320805.8	NFATC2IP-001	Protein coding	0.158981	1.74628e-05	0.000257373	No
HsInv0786	Imputed (rs153106)	ENST00000570200.5	ATXN2L-006	Protein coding	-0.259971	3.76698e-05	0.000543625	No
HsInv0786	Imputed (rs153106)	ENST00000568266.5	ATXN2L-013	Protein coding	-0.200408	5.55966e-05	0.000785958	No
HsInv0786	Imputed (rs153106)	ENST00000311008.15	SPNS1-001	Protein coding	0.160274	8.38212e-05	0.00116126	No
HsInv0786	Imputed (rs153106)	ENST00000568426.1	EIF3C-017	Protein coding	0.122818	0.000102557	0.00136618	No
HsInv0786	Imputed (rs153106)	ENST00000313511.7	TUFM-001	Protein coding	0.121077	0.000135185	0.00176685	No
HsInv0786	Imputed (rs153106)	ENST00000356897.1	IL27-001	Protein coding	0.205608	0.000217006	0.00259174	Yes
HsInv0786	Imputed (rs153106)	ENST00000566086.1	EIF3C-020	Protein coding	0.123956	0.000265401	0.00306407	No
HsInv0786	Imputed (rs153106)	ENST00000566519.1	EIF3C-019	Protein coding	0.243554	0.000329896	0.0036273	No
HsInv0786	Imputed (rs153106)	ENST00000359984.12	CLN3-001	Protein coding	0.17926	0.000621856	0.00642928	No
HsInv0786	Imputed (rs153106)	ENST00000564470.1	ATP2A1-005	Protein coding	0.210906	0.00124197	0.0117647	No
HsInv0786	Imputed (rs153106)	ENST00000331666.10	EIF3C-001	Protein coding	0.172358	0.00189747	0.016227	No
HsInv0786	Imputed (rs153106)	ENST00000507031.2	RP11-1348G14.4-001	LincRNA	0.187139	0.00297837	0.0241987	No
HsInv0786	Imputed (rs153106)	ENST00000337120.9	SH2B1-002	Protein coding	0.0851944	0.00355188	0.0273378	No
HsInv0786	Imputed (rs153106)	ENST00000614819.1	RP11-1348G14.8-001	Antisense	0.0939262	0.00498459	0.0362807	No
HsInv0786	Imputed (rs153106)	ENST00000569969.5	RP11-264B17.3-001	Processed transcript	0.170785	0.0068167	0.0473601	No
HsInv0786	Imputed (rs153106)	ENST00000314752.11	SULT1A1-002	Protein coding	-0.179646	0.00731132	0.0493386	No

## Sheet: S10-GTEx
Supplemental Table S10. Potential effects of inversions on gene expression across different tissues from the GTEx project. Inversion effects were estimated with FAPI v0.1 (Kwan et al. 2016) through variants reported as cis-eQTLs in GTEx Analysis Release v7 by permuting 30 samples to calculate the linkage disequilibrium (LD) with the inversion. Inversions in high LD with the most significant varia…
Inversion	Gene/Transcript (GENCODE version 19)	Gene symbol	Gene type	Tissue	Estimated P value	Effect size	Potential lead eQTL
HsInv0382	ENSG00000231081.1	RP4-760C5.3	LincRNA	Brain Cerebellum	1.17588e-05	0.507064	No
HsInv0382	ENSG00000231081.1	RP4-760C5.3	LincRNA	Nerve Tibial	1.17031e-05	0.290727	No
HsInv0382	ENSG00000231081.1	RP4-760C5.3	LincRNA	Thyroid	0.000282255	0.239203	No
HsInv0382	ENSG00000100997.18	ABHD12	Protein coding	Cells Transformed fibroblasts	3.58874e-07	-0.218195	No
HsInv0382	ENSG00000175170.14	FAM182B	Protein coding	Adrenal Gland	3.718e-06	-0.500984	No
HsInv0382	ENSG00000175170.14	FAM182B	Protein coding	Artery Tibial	7.11839e-05	-0.234559	No
HsInv0382	ENSG00000175170.14	FAM182B	Protein coding	Brain Cerebellar Hemisphere	3.77833e-07	-0.66325	No
HsInv0382	ENSG00000175170.14	FAM182B	Protein coding	Brain Cerebellum	8.57e-07	-0.587375	No
HsInv0382	ENSG00000175170.14	FAM182B	Protein coding	Brain Nucleus accumbens basal ganglia	3.6976e-05	-0.538858	No
HsInv0382	ENSG00000175170.14	FAM182B	Protein coding	Colon Sigmoid	8.29636e-05	-0.333518	No
HsInv0382	ENSG00000175170.14	FAM182B	Protein coding	Esophagus Mucosa	2.59473e-07	0.304855	No
HsInv0382	ENSG00000175170.14	FAM182B	Protein coding	Heart Atrial Appendage	8.58506e-05	-0.2782	No
HsInv0382	ENSG00000175170.14	FAM182B	Protein coding	Heart Left Ventricle	1.99947e-07	-0.414632	No
HsInv0382	ENSG00000175170.14	FAM182B	Protein coding	Lung	5.95569e-05	-0.215244	No
HsInv0382	ENSG00000175170.14	FAM182B	Protein coding	Muscle Skeletal	0.000148246	-0.195	No
HsInv0382	ENSG00000204556.4	CTD-2514C3.1	Pseudogene	Adipose Subcutaneous	3.67791e-05	0.293516	No
HsInv0382	ENSG00000204556.4	CTD-2514C3.1	Pseudogene	Artery Tibial	9.07975e-06	0.313948	No
HsInv0382	ENSG00000204556.4	CTD-2514C3.1	Pseudogene	Testis	3.40461e-05	0.325796	No
HsInv0382	ENSG00000250090.1	RP13-401N8.3	Pseudogene	Pituitary	2.23873e-05	0.471985	No
HsInv0389	ENSG00000277203.1	F8A1	Protein coding	Artery Tibial	2.49788e-05	-0.230005	No
HsInv0389	ENSG00000277203.1	F8A1	Protein coding	Lung	3.42052e-05	-0.178389	No
HsInv0389	ENSG00000277203.1	F8A1	Protein coding	Skin Sun Exposed Lower leg	5.97251e-06	-0.220435	No
HsInv0389	ENSG00000071889.16	FAM3A	Protein coding	Adipose Visceral Omentum	8.42867e-07	0.172013	No
HsInv0389	ENSG00000071889.16	FAM3A	Protein coding	Colon Sigmoid	4.33222e-05	0.212148	No
HsInv0389	ENSG00000071889.16	FAM3A	Protein coding	Colon Transverse	1.2092e-05	0.150916	No
HsInv0389	ENSG00000071889.16	FAM3A	Protein coding	Pancreas	1.67032e-06	0.229925	No
HsInv0389	ENSG00000071889.16	FAM3A	Protein coding	Skin Not Sun Exposed Suprapubic	9.67609e-06	0.132828	No
HsInv0389	ENSG00000071889.16	FAM3A	Protein coding	Whole Blood	3.93111e-08	0.153952	No
HsInv0389	ENSG00000196976.7	LAGE3	Protein coding	Artery Tibial	2.25873e-06	0.120404	No
HsInv0389	ENSG00000196976.7	LAGE3	Protein coding	Nerve Tibial	2.54724e-08	0.149817	No
HsInv0389	ENSG00000196976.7	LAGE3	Protein coding	Skin Sun Exposed Lower leg	5.03544e-05	0.106125	No
HsInv0389	ENSG00000130827.6	PLXNA3	Protein coding	Adipose Visceral Omentum	1.63056e-05	-0.165907	No
HsInv0389	ENSG00000130827.6	PLXNA3	Protein coding	Brain Cerebellar Hemisphere	5.58277e-06	-0.293085	No
HsInv0389	ENSG00000130827.6	PLXNA3	Protein coding	Brain Frontal Cortex BA9	3.28382e-06	-0.377171	No
HsInv0389	ENSG00000130827.6	PLXNA3	Protein coding	Brain Putamen basal ganglia	6.83233e-06	-0.328149	No
HsInv0389	ENSG00000130827.6	PLXNA3	Protein coding	Cells Transformed fibroblasts	5.58999e-08	-0.151105	No
HsInv0389	ENSG00000130827.6	PLXNA3	Protein coding	Colon Transverse	9.28833e-08	-0.22191	No
HsInv0389	ENSG00000130827.6	PLXNA3	Protein coding	Esophagus Gastroesophageal Junction	3.92e-07	-0.199534	No
HsInv0389	ENSG00000130827.6	PLXNA3	Protein coding	Heart Atrial Appendage	6.76667e-06	-0.17406	No
HsInv0389	ENSG00000130827.6	PLXNA3	Protein coding	Liver	1.81035e-05	-0.251228	No
HsInv0389	ENSG00000130827.6	PLXNA3	Protein coding	Whole Blood	3.84343e-07	-0.118882	No
HsInv0395	ENSG00000227486.1	RP13-188A5.1	LincRNA	Cells EBV-transformed lymphocytes	1.02203e-08	-0.681674	No
HsInv0395	ENSG00000102349.17	KLF8	Protein coding	Artery Aorta	7.27719e-05	0.1693	No
HsInv0395	ENSG00000102349.17	KLF8	Protein coding	Artery Tibial	1.32407e-05	0.101899	No
HsInv0395	ENSG00000102349.17	KLF8	Protein coding	Esophagus Mucosa	2.3e-08	0.136823	No
HsInv0395	ENSG00000102349.17	KLF8	Protein coding	Skin Not Sun Exposed Suprapubic	3.61543e-05	0.100888	No
HsInv0395	ENSG00000102349.17	KLF8	Protein coding	Skin Sun Exposed Lower leg	9.95968e-05	0.0733595	No
HsInv0395	ENSG00000187601.4	MAGEH1	Protein coding	Artery Aorta	9.22941e-06	0.176412	No
HsInv0395	ENSG00000187601.4	MAGEH1	Protein coding	Artery Tibial	1.15488e-07	0.154419	No
HsInv0395	ENSG00000187601.4	MAGEH1	Protein coding	Cells Transformed fibroblasts	7.25319e-12	0.167473	No
HsInv0395	ENSG00000083750.12	RRAGB	Protein coding	Cells EBV-transformed lymphocytes	9.1626e-06	-0.287206	No
HsInv0395	ENSG00000083750.12	RRAGB	Protein coding	Cells Transformed fibroblasts	1.70781e-05	-0.0912106	No
HsInv0395	ENSG00000067445.20	TRO	Protein coding	Thyroid	0.000105473	0.120859	No
HsInv0395	ENSG00000247746.4	USP51	Protein coding	Artery Tibial	7.15817e-06	0.15453	No
HsInv0573	ENSG00000236234.1	AC091132.1	Antisense	Brain Cerebellar Hemisphere	6.06078e-06	-0.57508	No
HsInv0573	ENSG00000236234.1	AC091132.1	Antisense	Brain Cerebellum	7.22362e-08	-0.600381	Yes
HsInv0573	ENSG00000236234.1	AC091132.1	Antisense	Cells EBV-transformed lymphocytes	3.26292e-07	-0.624153	Yes
HsInv0573	ENSG00000236234.1	AC091132.1	Antisense	Esophagus Mucosa	1.40343e-09	-0.26134	No
HsInv0573	ENSG00000236234.1	AC091132.1	Antisense	Testis	2.21938e-09	-0.62687	No
HsInv0573	ENSG00000267344.1	CTB-39G8.3	Antisense	Esophagus Mucosa	3.08e-07	-0.20457	No
HsInv0573	ENSG00000267344.1	CTB-39G8.3	Antisense	Skin Not Sun Exposed Suprapubic	8.59352e-06	0.233296	No
HsInv0573	ENSG00000267121.5	CTD-2020K17.1	Antisense	Brain Cerebellum	7.5e-08	-0.502267	Yes
HsInv0573	ENSG00000214401.4	KANSL1-AS1	Antisense	Adipose Subcutaneous	2.50728e-70	1.17589	Yes
HsInv0573	ENSG00000214401.4	KANSL1-AS1	Antisense	Adipose Visceral Omentum	6.28437e-70	1.25692	Yes
HsInv0573	ENSG00000214401.4	KANSL1-AS1	Antisense	Adrenal Gland	2.0964e-31	1.22181	No
HsInv0573	ENSG00000214401.4	KANSL1-AS1	Antisense	Artery Aorta	3.75375e-60	1.19912	Yes
HsInv0573	ENSG00000214401.4	KANSL1-AS1	Antisense	Artery Coronary	6.57559e-27	1.1781	No
HsInv0573	ENSG00000214401.4	KANSL1-AS1	Antisense	Artery Tibial	5.29636e-83	1.16088	Yes
HsInv0573	ENSG00000214401.4	KANSL1-AS1	Antisense	Brain Amygdala	2.35207e-10	0.840159	Yes
HsInv0573	ENSG00000214401.4	KANSL1-AS1	Antisense	Brain Anterior cingulate cortex BA24	1.6232e-16	0.953742	Yes
HsInv0573	ENSG00000214401.4	KANSL1-AS1	Antisense	Brain Caudate basal ganglia	3.43826e-23	1.12417	Yes
HsInv0573	ENSG00000214401.4	KANSL1-AS1	Antisense	Brain Cerebellar Hemisphere	4.49323e-22	1.05119	Yes
HsInv0573	ENSG00000214401.4	KANSL1-AS1	Antisense	Brain Cerebellum	1.99915e-27	1.18257	Yes
HsInv0573	ENSG00000214401.4	KANSL1-AS1	Antisense	Brain Cortex	9.18011e-33	1.22168	Yes
HsInv0573	ENSG00000214401.4	KANSL1-AS1	Antisense	Brain Frontal Cortex BA9	6.42593e-18	1.07182	Yes
HsInv0573	ENSG00000214401.4	KANSL1-AS1	Antisense	Brain Hippocampus	7.99358e-19	1.23011	Yes
HsInv0573	ENSG00000214401.4	KANSL1-AS1	Antisense	Brain Hypothalamus	1.14849e-15	1.1262	Yes
HsInv0573	ENSG00000214401.4	KANSL1-AS1	Antisense	Brain Nucleus accumbens basal ganglia	6.90329e-24	1.04867	Yes
HsInv0573	ENSG00000214401.4	KANSL1-AS1	Antisense	Brain Putamen basal ganglia	7.66999e-24	1.18819	Yes
HsInv0573	ENSG00000214401.4	KANSL1-AS1	Antisense	Brain Spinal cord cervical c-1	2.18171e-13	1.0303	Yes
HsInv0573	ENSG00000214401.4	KANSL1-AS1	Antisense	Brain Substantia nigra	4.03863e-10	1.17912	Yes
HsInv0573	ENSG00000214401.4	KANSL1-AS1	Antisense	Breast Mammary Tissue	2.00222e-45	1.08583	Yes
HsInv0573	ENSG00000214401.4	KANSL1-AS1	Antisense	Cells EBV-transformed lymphocytes	1.13475e-22	1.0243	Yes
HsInv0573	ENSG00000214401.4	KANSL1-AS1	Antisense	Cells Transformed fibroblasts	8.08475e-63	1.09734	Yes
HsInv0573	ENSG00000214401.4	KANSL1-AS1	Antisense	Colon Sigmoid	3.12628e-42	1.21504	No
HsInv0573	ENSG00000214401.4	KANSL1-AS1	Antisense	Colon Transverse	3.5142e-51	1.15997	Yes
HsInv0573	ENSG00000214401.4	KANSL1-AS1	Antisense	Esophagus Gastroesophageal Junction	7.2769e-50	1.16383	Yes
HsInv0573	ENSG00000214401.4	KANSL1-AS1	Antisense	Esophagus Mucosa	1.77069e-67	1.15339	No
HsInv0573	ENSG00000214401.4	KANSL1-AS1	Antisense	Esophagus Muscularis	8.75239e-67	1.21219	Yes
HsInv0573	ENSG00000214401.4	KANSL1-AS1	Antisense	Heart Atrial Appendage	1.2965e-53	1.16862	Yes
HsInv0573	ENSG00000214401.4	KANSL1-AS1	Antisense	Heart Left Ventricle	1.64571e-46	1.16916	No
HsInv0573	ENSG00000214401.4	KANSL1-AS1	Antisense	Liver	1.32945e-31	1.19238	Yes
HsInv0573	ENSG00000214401.4	KANSL1-AS1	Antisense	Lung	3.18126e-79	1.28347	Yes
HsInv0573	ENSG00000214401.4	KANSL1-AS1	Antisense	Minor Salivary Gland	2.06099e-20	1.37756	Yes
HsInv0573	ENSG00000214401.4	KANSL1-AS1	Antisense	Muscle Skeletal	5.07012e-100	1.19001	Yes
HsInv0573	ENSG00000214401.4	KANSL1-AS1	Antisense	Nerve Tibial	6.34053e-63	1.1668	Yes
HsInv0573	ENSG00000214401.4	KANSL1-AS1	Antisense	Ovary	1.49655e-19	1.15754	Yes
HsInv0573	ENSG00000214401.4	KANSL1-AS1	Antisense	Pancreas	1.933e-39	1.14642	Yes
HsInv0573	ENSG00000214401.4	KANSL1-AS1	Antisense	Pituitary	4.79778e-30	1.1794	No
HsInv0573	ENSG00000214401.4	KANSL1-AS1	Antisense	Prostate	3.15879e-27	1.19504	No
HsInv0573	ENSG00000214401.4	KANSL1-AS1	Antisense	Skin Not Sun Exposed Suprapubic	1.90957e-75	1.25482	Yes
HsInv0573	ENSG00000214401.4	KANSL1-AS1	Antisense	Skin Sun Exposed Lower leg	2.05606e-83	1.22378	Yes
HsInv0573	ENSG00000214401.4	KANSL1-AS1	Antisense	Small Intestine Terminal Ileum	7.3141e-28	1.16841	Yes
HsInv0573	ENSG00000214401.4	KANSL1-AS1	Antisense	Spleen	1.62201e-23	1.12556	Yes
HsInv0573	ENSG00000214401.4	KANSL1-AS1	Antisense	Stomach	3.74109e-47	1.22151	Yes
HsInv0573	ENSG00000214401.4	KANSL1-AS1	Antisense	Testis	1.84067e-41	1.17864	Yes
HsInv0573	ENSG00000214401.4	KANSL1-AS1	Antisense	Thyroid	7.63287e-82	1.1658	Yes
HsInv0573	ENSG00000214401.4	KANSL1-AS1	Antisense	Uterus	1.15775e-18	1.07127	Yes
HsInv0573	ENSG00000214401.4	KANSL1-AS1	Antisense	Vagina	2.35423e-23	1.2656	Yes
HsInv0573	ENSG00000214401.4	KANSL1-AS1	Antisense	Whole Blood	5.68942e-71	1.20435	Yes
HsInv0573	ENSG00000264589.2	MAPT-AS1	Antisense	Brain Cerebellum	1.66358e-06	0.514921	Yes
HsInv0573	ENSG00000264589.2	MAPT-AS1	Antisense	Brain Nucleus accumbens basal ganglia	6e-08	-0.663022	Yes
HsInv0573	ENSG00000264589.2	MAPT-AS1	Antisense	Muscle Skeletal	1.72528e-12	-0.414438	Yes
HsInv0573	ENSG00000262881.1	RP11-669E14.4	Antisense	Liver	7.91275e-24	-0.677577	Yes
HsInv0573	ENSG00000262372.1	RP11-669E14.6	Antisense	Testis	6.74575e-05	-0.3742	Yes
HsInv0573	ENSG00000232300.1	FAM215B	LincRNA	Adipose Subcutaneous	4.04473e-05	0.369137	No
HsInv0573	ENSG00000232300.1	FAM215B	LincRNA	Brain Cerebellar Hemisphere	8.32056e-11	0.889828	Yes
HsInv0573	ENSG00000232300.1	FAM215B	LincRNA	Brain Cerebellum	9.1473e-15	0.839223	No
HsInv0573	ENSG00000232300.1	FAM215B	LincRNA	Brain Nucleus accumbens basal ganglia	2.64109e-05	0.635611	No
HsInv0573	ENSG00000232300.1	FAM215B	LincRNA	Esophagus Muscularis	1.80164e-07	0.483212	Yes
HsInv0573	ENSG00000232300.1	FAM215B	LincRNA	Lung	4.71997e-10	0.5283	Yes
HsInv0573	ENSG00000232300.1	FAM215B	LincRNA	Nerve Tibial	2.12638e-08	0.501324	No
HsInv0573	ENSG00000232300.1	FAM215B	LincRNA	Pituitary	3.60064e-07	0.583707	No
HsInv0573	ENSG00000232300.1	FAM215B	LincRNA	Prostate	3.57e-07	0.790284	Yes
HsInv0573	ENSG00000232300.1	FAM215B	LincRNA	Thyroid	1.43181e-20	0.73313	Yes
HsInv0573	ENSG00000131484.4	RP11-798G7.5	LincRNA	Adipose Visceral Omentum	4.15876e-05	-0.359541	No
HsInv0573	ENSG00000131484.4	RP11-798G7.5	LincRNA	Brain Cerebellar Hemisphere	8.34351e-09	-0.795333	Yes
HsInv0573	ENSG00000131484.4	RP11-798G7.5	LincRNA	Brain Cerebellum	9.17111e-14	-0.900447	Yes
HsInv0573	ENSG00000131484.4	RP11-798G7.5	LincRNA	Breast Mammary Tissue	2.93586e-05	-0.404282	No
HsInv0573	ENSG00000131484.4	RP11-798G7.5	LincRNA	Esophagus Gastroesophageal Junction	3.8e-08	-0.607571	No
HsInv0573	ENSG00000131484.4	RP11-798G7.5	LincRNA	Esophagus Mucosa	1.49131e-15	-0.705669	No
HsInv0573	ENSG00000131484.4	RP11-798G7.5	LincRNA	Lung	1.95129e-08	-0.525389	No
HsInv0573	ENSG00000131484.4	RP11-798G7.5	LincRNA	Skin Not Sun Exposed Suprapubic	9.11089e-12	-0.63007	No
HsInv0573	ENSG00000131484.4	RP11-798G7.5	LincRNA	Skin Sun Exposed Lower leg	4.89682e-09	-0.511935	No
HsInv0573	ENSG00000131484.4	RP11-798G7.5	LincRNA	Spleen	2.50619e-06	-0.703258	No
HsInv0573	ENSG00000131484.4	RP11-798G7.5	LincRNA	Testis	6.79494e-16	-0.846742	Yes
HsInv0573	ENSG00000131484.4	RP11-798G7.5	LincRNA	Thyroid	2.9e-07	-0.45031	No
HsInv0573	ENSG00000267198.1	RP11-798G7.6	LincRNA	Esophagus Mucosa	1.006e-06	-0.452644	No
HsInv0573	ENSG00000159314.11	ARHGAP27	Protein coding	Adipose Visceral Omentum	3.18535e-05	-0.199756	No
HsInv0573	ENSG00000159314.11	ARHGAP27	Protein coding	Brain Caudate basal ganglia	1.53974e-05	0.247	Yes
HsInv0573	ENSG00000159314.11	ARHGAP27	Protein coding	Brain Nucleus accumbens basal ganglia	3.8078e-08	0.480498	Yes
HsInv0573	ENSG00000159314.11	ARHGAP27	Protein coding	Cells EBV-transformed lymphocytes	9.08757e-15	-0.569985	Yes
HsInv0573	ENSG00000159314.11	ARHGAP27	Protein coding	Esophagus Mucosa	6.65359e-19	-0.216971	Yes
HsInv0573	ENSG00000159314.11	ARHGAP27	Protein coding	Skin Not Sun Exposed Suprapubic	1.99822e-20	0.388365	No
HsInv0573	ENSG00000159314.11	ARHGAP27	Protein coding	Skin Sun Exposed Lower leg	3.44705e-29	0.473522	No
HsInv0573	ENSG00000159314.11	ARHGAP27	Protein coding	Testis	7.03336e-05	-0.267645	No
HsInv0573	ENSG00000185829.17	ARL17A	Protein coding	Adipose Subcutaneous	2.47523e-09	0.513556	Yes
HsInv0573	ENSG00000185829.17	ARL17A	Protein coding	Adipose Visceral Omentum	1.73289e-06	0.485526	No
HsInv0573	ENSG00000185829.17	ARL17A	Protein coding	Adrenal Gland	1.52249e-09	0.936621	Yes
HsInv0573	ENSG00000185829.17	ARL17A	Protein coding	Artery Aorta	6.49108e-06	0.388636	No
HsInv0573	ENSG00000185829.17	ARL17A	Protein coding	Brain Anterior cingulate cortex BA24	4.68792e-09	0.885478	No
HsInv0573	ENSG00000185829.17	ARL17A	Protein coding	Brain Caudate basal ganglia	3.18629e-10	0.981521	Yes
HsInv0573	ENSG00000185829.17	ARL17A	Protein coding	Brain Cerebellar Hemisphere	6.54684e-18	1.40317	Yes
HsInv0573	ENSG00000185829.17	ARL17A	Protein coding	Brain Cerebellum	3.75506e-20	1.43503	Yes
HsInv0573	ENSG00000185829.17	ARL17A	Protein coding	Brain Cortex	2.69903e-14	1.27541	Yes
HsInv0573	ENSG00000185829.17	ARL17A	Protein coding	Brain Frontal Cortex BA9	7.95201e-13	1.35609	No
HsInv0573	ENSG00000185829.17	ARL17A	Protein coding	Brain Hippocampus	1.96595e-05	0.757192	No
HsInv0573	ENSG00000185829.17	ARL17A	Protein coding	Brain Hypothalamus	9.20481e-11	1.31424	Yes
HsInv0573	ENSG00000185829.17	ARL17A	Protein coding	Brain Nucleus accumbens basal ganglia	1.13018e-11	1.1729	Yes
HsInv0573	ENSG00000185829.17	ARL17A	Protein coding	Brain Putamen basal ganglia	1.33225e-12	0.920375	Yes
HsInv0573	ENSG00000185829.17	ARL17A	Protein coding	Cells Transformed fibroblasts	2.20683e-09	0.760101	No
HsInv0573	ENSG00000185829.17	ARL17A	Protein coding	Colon Transverse	1.77329e-05	0.588839	No
HsInv0573	ENSG00000185829.17	ARL17A	Protein coding	Esophagus Mucosa	9.61405e-07	0.553597	No
HsInv0573	ENSG00000185829.17	ARL17A	Protein coding	Esophagus Muscularis	4.18559e-07	0.557261	Yes
HsInv0573	ENSG00000185829.17	ARL17A	Protein coding	Heart Atrial Appendage	4.71106e-08	0.668985	No
HsInv0573	ENSG00000185829.17	ARL17A	Protein coding	Heart Left Ventricle	5.47613e-06	0.587457	No
HsInv0573	ENSG00000185829.17	ARL17A	Protein coding	Liver	2.52038e-05	0.670942	No
HsInv0573	ENSG00000185829.17	ARL17A	Protein coding	Lung	1.2e-08	0.58267	No
HsInv0573	ENSG00000185829.17	ARL17A	Protein coding	Muscle Skeletal	1.17271e-13	0.611506	No
HsInv0573	ENSG00000185829.17	ARL17A	Protein coding	Pancreas	7.50691e-06	0.664484	No
HsInv0573	ENSG00000185829.17	ARL17A	Protein coding	Pituitary	1.36772e-13	1.22388	No
HsInv0573	ENSG00000185829.17	ARL17A	Protein coding	Skin Sun Exposed Lower leg	4.00747e-06	0.447201	No
HsInv0573	ENSG00000185829.17	ARL17A	Protein coding	Testis	1.68214e-05	0.56005	No
HsInv0573	ENSG00000185829.17	ARL17A	Protein coding	Thyroid	4.98201e-24	1.01233	Yes
HsInv0573	ENSG00000228696.8	ARL17B	Protein coding	Testis	6.74282e-23	1.00509	Yes
HsInv0573	ENSG00000120088.14	CRHR1	Protein coding	Adipose Subcutaneous	1e-09	0.44403	Yes
HsInv0573	ENSG00000120088.14	CRHR1	Protein coding	Adipose Visceral Omentum	2.66829e-14	0.493435	Yes
HsInv0573	ENSG00000120088.14	CRHR1	Protein coding	Breast Mammary Tissue	2.45491e-15	0.465228	Yes
HsInv0573	ENSG00000120088.14	CRHR1	Protein coding	Esophagus Muscularis	1.61253e-07	0.382789	Yes
HsInv0573	ENSG00000120088.14	CRHR1	Protein coding	Muscle Skeletal	6.3373e-05	0.239735	Yes
HsInv0573	ENSG00000120088.14	CRHR1	Protein coding	Nerve Tibial	1.08153e-08	0.475316	Yes
HsInv0573	ENSG00000184922.13	FMNL1	Protein coding	Brain Cerebellar Hemisphere	5.12975e-11	-0.665564	Yes
HsInv0573	ENSG00000184922.13	FMNL1	Protein coding	Brain Cerebellum	3.96077e-14	-0.67629	No
HsInv0573	ENSG00000120071.13	KANSL1	Protein coding	Adipose Subcutaneous	1.49459e-05	0.263764	No
HsInv0573	ENSG00000120071.13	KANSL1	Protein coding	Cells EBV-transformed lymphocytes	1.77313e-10	0.697488	Yes
HsInv0573	ENSG00000120071.13	KANSL1	Protein coding	Cells Transformed fibroblasts	2.84261e-17	0.301134	Yes
HsInv0573	ENSG00000120071.13	KANSL1	Protein coding	Esophagus Mucosa	8.40764e-13	0.351697	No
HsInv0573	ENSG00000120071.13	KANSL1	Protein coding	Lung	4.31333e-06	0.324338	No
HsInv0573	ENSG00000120071.13	KANSL1	Protein coding	Muscle Skeletal	7.10636e-13	0.374331	Yes
HsInv0573	ENSG00000120071.13	KANSL1	Protein coding	Pituitary	3.5208e-05	0.487596	No
HsInv0573	ENSG00000120071.13	KANSL1	Protein coding	Skin Not Sun Exposed Suprapubic	2.45939e-06	0.242357	No
HsInv0573	ENSG00000120071.13	KANSL1	Protein coding	Skin Sun Exposed Lower leg	5.62589e-12	0.328225	No
HsInv0573	ENSG00000120071.13	KANSL1	Protein coding	Small Intestine Terminal Ileum	2.13242e-05	0.372185	No
HsInv0573	ENSG00000120071.13	KANSL1	Protein coding	Whole Blood	8.03125e-08	0.250405	No
HsInv0573	ENSG00000176681.14	LRRC37A	Protein coding	Adipose Subcutaneous	6.59364e-22	0.798372	No
HsInv0573	ENSG00000176681.14	LRRC37A	Protein coding	Adipose Visceral Omentum	1.44398e-16	0.64962	No
HsInv0573	ENSG00000176681.14	LRRC37A	Protein coding	Artery Aorta	8.75125e-13	0.624621	No
HsInv0573	ENSG00000176681.14	LRRC37A	Protein coding	Artery Coronary	2.1808e-10	0.78095	No
HsInv0573	ENSG00000176681.14	LRRC37A	Protein coding	Artery Tibial	1.79511e-28	0.877884	No
HsInv0573	ENSG00000176681.14	LRRC37A	Protein coding	Brain Caudate basal ganglia	9.35665e-08	0.720579	No
HsInv0573	ENSG00000176681.14	LRRC37A	Protein coding	Brain Cerebellar Hemisphere	8.92829e-14	1.03163	No
HsInv0573	ENSG00000176681.14	LRRC37A	Protein coding	Brain Cerebellum	2.59703e-18	1.01192	No
HsInv0573	ENSG00000176681.14	LRRC37A	Protein coding	Brain Cortex	3.47193e-08	0.720959	No
HsInv0573	ENSG00000176681.14	LRRC37A	Protein coding	Brain Frontal Cortex BA9	2.70666e-06	0.711047	No
HsInv0573	ENSG00000176681.14	LRRC37A	Protein coding	Brain Hippocampus	1.79484e-05	0.669535	No
HsInv0573	ENSG00000176681.14	LRRC37A	Protein coding	Brain Hypothalamus	5.17826e-07	0.884089	No
HsInv0573	ENSG00000176681.14	LRRC37A	Protein coding	Brain Nucleus accumbens basal ganglia	1.99317e-05	0.60971	No
HsInv0573	ENSG00000176681.14	LRRC37A	Protein coding	Brain Putamen basal ganglia	3.75828e-07	0.748895	No
HsInv0573	ENSG00000176681.14	LRRC37A	Protein coding	Brain Spinal cord cervical c-1	3.50829e-08	0.929725	No
HsInv0573	ENSG00000176681.14	LRRC37A	Protein coding	Breast Mammary Tissue	6.81938e-14	0.685916	No
HsInv0573	ENSG00000176681.14	LRRC37A	Protein coding	Colon Sigmoid	4.64327e-11	0.717639	No
HsInv0573	ENSG00000176681.14	LRRC37A	Protein coding	Colon Transverse	3.88229e-06	0.492982	No
HsInv0573	ENSG00000176681.14	LRRC37A	Protein coding	Esophagus Gastroesophageal Junction	2.23188e-12	0.630546	No
HsInv0573	ENSG00000176681.14	LRRC37A	Protein coding	Esophagus Mucosa	2.84159e-05	0.361427	No
HsInv0573	ENSG00000176681.14	LRRC37A	Protein coding	Esophagus Muscularis	1.36027e-20	0.740307	No
HsInv0573	ENSG00000176681.14	LRRC37A	Protein coding	Heart Atrial Appendage	1.86911e-05	0.421356	No
HsInv0573	ENSG00000176681.14	LRRC37A	Protein coding	Heart Left Ventricle	7.4034e-07	0.473279	No
HsInv0573	ENSG00000176681.14	LRRC37A	Protein coding	Lung	1.87706e-16	0.612421	No
HsInv0573	ENSG00000176681.14	LRRC37A	Protein coding	Muscle Skeletal	3.63367e-11	0.501416	No
HsInv0573	ENSG00000176681.14	LRRC37A	Protein coding	Nerve Tibial	2.16442e-29	0.970902	No
HsInv0573	ENSG00000176681.14	LRRC37A	Protein coding	Ovary	1.0853e-06	0.651436	No
HsInv0573	ENSG00000176681.14	LRRC37A	Protein coding	Pituitary	1.6861e-05	0.564388	No
HsInv0573	ENSG00000176681.14	LRRC37A	Protein coding	Prostate	2.5e-08	0.768004	No
HsInv0573	ENSG00000176681.14	LRRC37A	Protein coding	Skin Not Sun Exposed Suprapubic	2.27873e-21	0.687114	Yes
HsInv0573	ENSG00000176681.14	LRRC37A	Protein coding	Skin Sun Exposed Lower leg	8.33537e-28	0.755509	No
HsInv0573	ENSG00000176681.14	LRRC37A	Protein coding	Small Intestine Terminal Ileum	3.98e-07	0.614558	No
HsInv0573	ENSG00000176681.14	LRRC37A	Protein coding	Stomach	9.84041e-06	0.475831	No
HsInv0573	ENSG00000176681.14	LRRC37A	Protein coding	Thyroid	2.94437e-08	0.44751	No
HsInv0573	ENSG00000176681.14	LRRC37A	Protein coding	Uterus	3.35357e-10	0.680031	No
HsInv0573	ENSG00000176681.14	LRRC37A	Protein coding	Whole Blood	2.4805e-10	0.536342	No
HsInv0573	ENSG00000238083.7	LRRC37A2	Protein coding	Adipose Subcutaneous	5.31002e-80	1.22174	Yes
HsInv0573	ENSG00000238083.7	LRRC37A2	Protein coding	Adipose Visceral Omentum	5.38215e-56	0.992959	Yes
HsInv0573	ENSG00000238083.7	LRRC37A2	Protein coding	Adrenal Gland	7.36297e-27	1.08091	Yes
HsInv0573	ENSG00000238083.7	LRRC37A2	Protein coding	Artery Aorta	9.86876e-50	1.04781	Yes
HsInv0573	ENSG00000238083.7	LRRC37A2	Protein coding	Artery Coronary	1.52073e-21	1.01281	Yes
HsInv0573	ENSG00000238083.7	LRRC37A2	Protein coding	Artery Tibial	7.59684e-66	1.16511	Yes
HsInv0573	ENSG00000238083.7	LRRC37A2	Protein coding	Brain Amygdala	2.94966e-15	1.08802	No
HsInv0573	ENSG00000238083.7	LRRC37A2	Protein coding	Brain Anterior cingulate cortex BA24	6.27225e-21	1.21392	No
HsInv0573	ENSG00000238083.7	LRRC37A2	Protein coding	Brain Caudate basal ganglia	7.80639e-30	1.17923	Yes
HsInv0573	ENSG00000238083.7	LRRC37A2	Protein coding	Brain Cerebellar Hemisphere	5.3933e-33	1.35617	Yes
HsInv0573	ENSG00000238083.7	LRRC37A2	Protein coding	Brain Cerebellum	7.01753e-37	1.19646	Yes
HsInv0573	ENSG00000238083.7	LRRC37A2	Protein coding	Brain Cortex	3.06542e-30	1.23742	Yes
HsInv0573	ENSG00000238083.7	LRRC37A2	Protein coding	Brain Frontal Cortex BA9	1.24293e-21	1.19568	Yes
HsInv0573	ENSG00000238083.7	LRRC37A2	Protein coding	Brain Hippocampus	4.74108e-20	1.13507	Yes
HsInv0573	ENSG00000238083.7	LRRC37A2	Protein coding	Brain Hypothalamus	4.64371e-23	1.34824	Yes
HsInv0573	ENSG00000238083.7	LRRC37A2	Protein coding	Brain Nucleus accumbens basal ganglia	2.60448e-27	1.19421	Yes
HsInv0573	ENSG00000238083.7	LRRC37A2	Protein coding	Brain Putamen basal ganglia	1.50189e-26	1.20966	Yes
HsInv0573	ENSG00000238083.7	LRRC37A2	Protein coding	Brain Spinal cord cervical c-1	6.0816e-14	1.12684	No
HsInv0573	ENSG00000238083.7	LRRC37A2	Protein coding	Brain Substantia nigra	1.86964e-08	1.01149	No
HsInv0573	ENSG00000238083.7	LRRC37A2	Protein coding	Breast Mammary Tissue	6.67051e-42	1.05733	Yes
HsInv0573	ENSG00000238083.7	LRRC37A2	Protein coding	Cells EBV-transformed lymphocytes	9.79399e-12	0.823552	Yes
HsInv0573	ENSG00000238083.7	LRRC37A2	Protein coding	Cells Transformed fibroblasts	6.9199e-34	0.951048	Yes
HsInv0573	ENSG00000238083.7	LRRC37A2	Protein coding	Colon Sigmoid	1.70939e-36	1.06647	Yes
HsInv0573	ENSG00000238083.7	LRRC37A2	Protein coding	Colon Transverse	6.68171e-37	1.02524	Yes
HsInv0573	ENSG00000238083.7	LRRC37A2	Protein coding	Esophagus Gastroesophageal Junction	3.40116e-40	1.02373	Yes
HsInv0573	ENSG00000238083.7	LRRC37A2	Protein coding	Esophagus Mucosa	1.57632e-47	0.972644	Yes
HsInv0573	ENSG00000238083.7	LRRC37A2	Protein coding	Esophagus Muscularis	3.77812e-58	1.02454	Yes
HsInv0573	ENSG00000238083.7	LRRC37A2	Protein coding	Heart Atrial Appendage	4.84947e-41	0.986538	Yes
HsInv0573	ENSG00000238083.7	LRRC37A2	Protein coding	Heart Left Ventricle	7.09665e-40	0.964267	Yes
HsInv0573	ENSG00000238083.7	LRRC37A2	Protein coding	Liver	2.04243e-17	0.86169	Yes
HsInv0573	ENSG00000238083.7	LRRC37A2	Protein coding	Lung	2.3821e-59	0.982296	Yes
HsInv0573	ENSG00000238083.7	LRRC37A2	Protein coding	Minor Salivary Gland	1.43299e-10	1.03205	Yes
HsInv0573	ENSG00000238083.7	LRRC37A2	Protein coding	Muscle Skeletal	6.12585e-53	0.98382	No
HsInv0573	ENSG00000238083.7	LRRC37A2	Protein coding	Nerve Tibial	3.5261e-67	1.21576	Yes
HsInv0573	ENSG00000238083.7	LRRC37A2	Protein coding	Ovary	2.8445e-16	0.86133	Yes
HsInv0573	ENSG00000238083.7	LRRC37A2	Protein coding	Pancreas	1.08252e-31	1.05364	Yes
HsInv0573	ENSG00000238083.7	LRRC37A2	Protein coding	Pituitary	3.42242e-35	1.20814	Yes
HsInv0573	ENSG00000238083.7	LRRC37A2	Protein coding	Prostate	1.25025e-24	1.08197	Yes
HsInv0573	ENSG00000238083.7	LRRC37A2	Protein coding	Skin Not Sun Exposed Suprapubic	7.05834e-37	0.832897	Yes
HsInv0573	ENSG00000238083.7	LRRC37A2	Protein coding	Skin Sun Exposed Lower leg	1.31571e-55	1.0177	Yes
HsInv0573	ENSG00000238083.7	LRRC37A2	Protein coding	Small Intestine Terminal Ileum	2.66165e-20	0.965321	Yes
HsInv0573	ENSG00000238083.7	LRRC37A2	Protein coding	Spleen	2.61637e-18	1.07624	Yes
HsInv0573	ENSG00000238083.7	LRRC37A2	Protein coding	Stomach	3.44628e-38	1.01367	Yes
HsInv0573	ENSG00000238083.7	LRRC37A2	Protein coding	Thyroid	8.77219e-73	1.06706	Yes
HsInv0573	ENSG00000238083.7	LRRC37A2	Protein coding	Uterus	1.05529e-14	0.814243	Yes
HsInv0573	ENSG00000238083.7	LRRC37A2	Protein coding	Vagina	2.72339e-14	0.852303	Yes
HsInv0573	ENSG00000238083.7	LRRC37A2	Protein coding	Whole Blood	1.6292e-30	0.794649	Yes
HsInv0573	ENSG00000186868.15	MAPT	Protein coding	Artery Aorta	1.46231e-05	-0.279418	No
HsInv0573	ENSG00000186868.15	MAPT	Protein coding	Brain Cerebellum	4.54643e-06	-0.331638	Yes
HsInv0573	ENSG00000186868.15	MAPT	Protein coding	Colon Sigmoid	1.94252e-12	-0.669967	No
HsInv0573	ENSG00000186868.15	MAPT	Protein coding	Colon Transverse	1.30029e-05	-0.180484	No
HsInv0573	ENSG00000186868.15	MAPT	Protein coding	Esophagus Mucosa	1.19629e-49	0.656829	Yes
HsInv0573	ENSG00000186868.15	MAPT	Protein coding	Heart Left Ventricle	8.14192e-10	-0.433058	No
HsInv0573	ENSG00000186868.15	MAPT	Protein coding	Lung	1.53211e-23	0.547681	No
HsInv0573	ENSG00000186868.15	MAPT	Protein coding	Skin Not Sun Exposed Suprapubic	6.28559e-08	0.303198	No
HsInv0573	ENSG00000186868.15	MAPT	Protein coding	Skin Sun Exposed Lower leg	3.82954e-16	0.471885	No
HsInv0573	ENSG00000186868.15	MAPT	Protein coding	Testis	1.32479e-65	1.14987	Yes
HsInv0573	ENSG00000186868.15	MAPT	Protein coding	Thyroid	9.86039e-06	-0.240987	No
HsInv0573	ENSG00000136448.11	NMT1	Protein coding	Cells Transformed fibroblasts	1.0979e-05	-0.162042	No
HsInv0573	ENSG00000136448.11	NMT1	Protein coding	Thyroid	1.44505e-06	-0.173433	No
HsInv0573	ENSG00000073969.18	NSF	Protein coding	Artery Tibial	1.94352e-05	-0.181753	No
HsInv0573	ENSG00000073969.18	NSF	Protein coding	Cells Transformed fibroblasts	3.58706e-05	0.170697	No
HsInv0573	ENSG00000073969.18	NSF	Protein coding	Esophagus Mucosa	3.64242e-07	-0.176291	Yes
HsInv0573	ENSG00000225190.10	PLEKHM1	Protein coding	Adrenal Gland	9e-09	0.430751	Yes
HsInv0573	ENSG00000225190.10	PLEKHM1	Protein coding	Brain Caudate basal ganglia	1.45576e-05	0.29921	No
HsInv0573	ENSG00000225190.10	PLEKHM1	Protein coding	Brain Cerebellar Hemisphere	5.77432e-16	-0.786987	No
HsInv0573	ENSG00000225190.10	PLEKHM1	Protein coding	Brain Cerebellum	2.74237e-27	-0.96654	Yes
HsInv0573	ENSG00000225190.10	PLEKHM1	Protein coding	Brain Cortex	1.46232e-08	0.487789	No
HsInv0573	ENSG00000225190.10	PLEKHM1	Protein coding	Brain Nucleus accumbens basal ganglia	4.26807e-06	0.397238	No
HsInv0573	ENSG00000225190.10	PLEKHM1	Protein coding	Brain Putamen basal ganglia	1.95514e-05	0.339397	No
HsInv0573	ENSG00000225190.10	PLEKHM1	Protein coding	Esophagus Mucosa	7.81872e-21	-0.337287	Yes
HsInv0573	ENSG00000225190.10	PLEKHM1	Protein coding	Esophagus Muscularis	3.67255e-06	0.141972	No
HsInv0573	ENSG00000225190.10	PLEKHM1	Protein coding	Lung	6.1e-07	0.213299	No
HsInv0573	ENSG00000225190.10	PLEKHM1	Protein coding	Muscle Skeletal	4.8608e-24	0.306511	No
HsInv0573	ENSG00000225190.10	PLEKHM1	Protein coding	Testis	7.28667e-06	-0.335213	No
HsInv0573	ENSG00000185294.6	SPPL2C	Protein coding	Brain Cerebellar Hemisphere	1.90177e-10	0.61867	Yes
HsInv0573	ENSG00000185294.6	SPPL2C	Protein coding	Brain Cerebellum	1.35165e-18	0.748094	Yes
HsInv0573	ENSG00000185294.6	SPPL2C	Protein coding	Brain Frontal Cortex BA9	3.51757e-05	0.493583	No
HsInv0573	ENSG00000108379.9	WNT3	Protein coding	Adipose Subcutaneous	2.12128e-07	0.371537	No
HsInv0573	ENSG00000108379.9	WNT3	Protein coding	Adrenal Gland	1.48697e-08	0.61309	No
HsInv0573	ENSG00000108379.9	WNT3	Protein coding	Artery Aorta	1.95021e-11	0.565743	No
HsInv0573	ENSG00000108379.9	WNT3	Protein coding	Artery Coronary	2.38262e-06	0.478945	Yes
HsInv0573	ENSG00000108379.9	WNT3	Protein coding	Artery Tibial	1.67657e-09	0.373202	No
HsInv0573	ENSG00000108379.9	WNT3	Protein coding	Breast Mammary Tissue	2.59058e-06	0.343526	No
HsInv0573	ENSG00000108379.9	WNT3	Protein coding	Colon Transverse	1.08646e-05	0.40803	No
HsInv0573	ENSG00000108379.9	WNT3	Protein coding	Esophagus Gastroesophageal Junction	1.17089e-06	0.439854	No
HsInv0573	ENSG00000108379.9	WNT3	Protein coding	Esophagus Muscularis	2.9547e-10	0.463339	No
HsInv0573	ENSG00000108379.9	WNT3	Protein coding	Heart Atrial Appendage	6.38608e-06	0.371482	No
HsInv0573	ENSG00000108379.9	WNT3	Protein coding	Heart Left Ventricle	8.99482e-06	0.437748	No
HsInv0573	ENSG00000108379.9	WNT3	Protein coding	Lung	2.63179e-10	0.297009	No
HsInv0573	ENSG00000108379.9	WNT3	Protein coding	Nerve Tibial	1.57694e-10	0.444789	No
HsInv0573	ENSG00000108379.9	WNT3	Protein coding	Pancreas	6.50831e-13	0.670773	No
HsInv0573	ENSG00000108379.9	WNT3	Protein coding	Pituitary	3e-09	0.491364	No
HsInv0573	ENSG00000108379.9	WNT3	Protein coding	Stomach	4.98558e-08	0.400655	No
HsInv0573	ENSG00000108379.9	WNT3	Protein coding	Testis	1.08741e-05	0.33341	No
HsInv0573	ENSG00000108379.9	WNT3	Protein coding	Thyroid	4.89271e-29	0.693651	No
HsInv0573	ENSG00000264070.1	DND1P1	Pseudogene	Adipose Subcutaneous	9.16666e-60	1.24656	Yes
HsInv0573	ENSG00000264070.1	DND1P1	Pseudogene	Adipose Visceral Omentum	2.60713e-61	1.30153	Yes
HsInv0573	ENSG00000264070.1	DND1P1	Pseudogene	Adrenal Gland	3.95173e-26	1.21843	Yes
HsInv0573	ENSG00000264070.1	DND1P1	Pseudogene	Artery Aorta	9.39332e-41	1.165	No
HsInv0573	ENSG00000264070.1	DND1P1	Pseudogene	Artery Coronary	1.55719e-21	1.28251	No
HsInv0573	ENSG00000264070.1	DND1P1	Pseudogene	Artery Tibial	4.06033e-65	1.28512	Yes
HsInv0573	ENSG00000264070.1	DND1P1	Pseudogene	Brain Amygdala	2.7756e-09	0.773549	Yes
HsInv0573	ENSG00000264070.1	DND1P1	Pseudogene	Brain Anterior cingulate cortex BA24	7.81765e-13	1.02639	Yes
HsInv0573	ENSG00000264070.1	DND1P1	Pseudogene	Brain Caudate basal ganglia	1.33592e-15	0.943728	Yes
HsInv0573	ENSG00000264070.1	DND1P1	Pseudogene	Brain Cerebellar Hemisphere	6.84118e-07	0.672691	Yes
HsInv0573	ENSG00000264070.1	DND1P1	Pseudogene	Brain Cerebellum	2.24625e-10	0.624857	Yes
HsInv0573	ENSG00000264070.1	DND1P1	Pseudogene	Brain Cortex	6.81104e-23	1.19156	Yes
HsInv0573	ENSG00000264070.1	DND1P1	Pseudogene	Brain Frontal Cortex BA9	3.57881e-11	0.932882	No
HsInv0573	ENSG00000264070.1	DND1P1	Pseudogene	Brain Hippocampus	1.94471e-12	1.02049	Yes
HsInv0573	ENSG00000264070.1	DND1P1	Pseudogene	Brain Hypothalamus	2.63912e-12	1.01292	No
HsInv0573	ENSG00000264070.1	DND1P1	Pseudogene	Brain Nucleus accumbens basal ganglia	1.85428e-15	1.04068	Yes
HsInv0573	ENSG00000264070.1	DND1P1	Pseudogene	Brain Putamen basal ganglia	1.37288e-16	1.03724	Yes
HsInv0573	ENSG00000264070.1	DND1P1	Pseudogene	Brain Spinal cord cervical c-1	8.6589e-11	1.04524	Yes
HsInv0573	ENSG00000264070.1	DND1P1	Pseudogene	Brain Substantia nigra	5.42416e-07	1.08115	Yes
HsInv0573	ENSG00000264070.1	DND1P1	Pseudogene	Breast Mammary Tissue	3.22006e-46	1.25709	No
HsInv0573	ENSG00000264070.1	DND1P1	Pseudogene	Cells EBV-transformed lymphocytes	1.63437e-18	1.06111	No
HsInv0573	ENSG00000264070.1	DND1P1	Pseudogene	Cells Transformed fibroblasts	4.85438e-51	1.16451	Yes
HsInv0573	ENSG00000264070.1	DND1P1	Pseudogene	Colon Sigmoid	2.2741e-31	1.20979	No
HsInv0573	ENSG00000264070.1	DND1P1	Pseudogene	Colon Transverse	1.15147e-42	1.20159	No
HsInv0573	ENSG00000264070.1	DND1P1	Pseudogene	Esophagus Gastroesophageal Junction	1.56062e-39	1.17646	Yes
HsInv0573	ENSG00000264070.1	DND1P1	Pseudogene	Esophagus Mucosa	2.58934e-40	0.970314	No
HsInv0573	ENSG00000264070.1	DND1P1	Pseudogene	Esophagus Muscularis	7.50818e-53	1.22327	No
HsInv0573	ENSG00000264070.1	DND1P1	Pseudogene	Heart Atrial Appendage	1.44503e-35	1.14737	No
HsInv0573	ENSG00000264070.1	DND1P1	Pseudogene	Heart Left Ventricle	5.00846e-40	1.20908	No
HsInv0573	ENSG00000264070.1	DND1P1	Pseudogene	Liver	4.87314e-28	1.29875	Yes
HsInv0573	ENSG00000264070.1	DND1P1	Pseudogene	Lung	1.7892e-59	1.22774	Yes
HsInv0573	ENSG00000264070.1	DND1P1	Pseudogene	Muscle Skeletal	1.54691e-85	1.25473	No
HsInv0573	ENSG00000264070.1	DND1P1	Pseudogene	Nerve Tibial	3.10336e-48	1.11814	No
HsInv0573	ENSG00000264070.1	DND1P1	Pseudogene	Ovary	3.58543e-18	1.25515	Yes
HsInv0573	ENSG00000264070.1	DND1P1	Pseudogene	Pancreas	1.61001e-27	1.15173	No
HsInv0573	ENSG00000264070.1	DND1P1	Pseudogene	Pituitary	7.79736e-25	1.16399	No
HsInv0573	ENSG00000264070.1	DND1P1	Pseudogene	Prostate	8.47805e-27	1.25642	Yes
HsInv0573	ENSG00000264070.1	DND1P1	Pseudogene	Skin Not Sun Exposed Suprapubic	7.40778e-66	1.26792	Yes
HsInv0573	ENSG00000264070.1	DND1P1	Pseudogene	Skin Sun Exposed Lower leg	5.74434e-71	1.18948	No
HsInv0573	ENSG00000264070.1	DND1P1	Pseudogene	Small Intestine Terminal Ileum	1.52683e-26	1.10466	Yes
HsInv0573	ENSG00000264070.1	DND1P1	Pseudogene	Spleen	8.54418e-20	1.18778	No
HsInv0573	ENSG00000264070.1	DND1P1	Pseudogene	Stomach	1.89927e-33	1.12773	No
HsInv0573	ENSG00000264070.1	DND1P1	Pseudogene	Testis	3.78902e-18	-0.573318	Yes
HsInv0573	ENSG00000264070.1	DND1P1	Pseudogene	Thyroid	4.75377e-72	1.20193	Yes
HsInv0573	ENSG00000264070.1	DND1P1	Pseudogene	Uterus	1.50612e-12	1.01586	No
HsInv0573	ENSG00000264070.1	DND1P1	Pseudogene	Vagina	8.29534e-14	0.930905	Yes
HsInv0573	ENSG00000264070.1	DND1P1	Pseudogene	Whole Blood	2.79499e-59	1.25834	No
HsInv0573	ENSG00000204650.14	LINC02210	Pseudogene	Adipose Subcutaneous	6.09339e-113	1.2684	Yes
HsInv0573	ENSG00000204650.14	LINC02210	Pseudogene	Adipose Visceral Omentum	2.91402e-106	0.9978	Yes
HsInv0573	ENSG00000204650.14	LINC02210	Pseudogene	Adrenal Gland	1.07727e-46	1.19034	Yes
HsInv0573	ENSG00000204650.14	LINC02210	Pseudogene	Artery Aorta	1.96712e-91	1.22891	Yes
HsInv0573	ENSG00000204650.14	LINC02210	Pseudogene	Artery Coronary	3.61231e-37	1.14081	Yes
HsInv0573	ENSG00000204650.14	LINC02210	Pseudogene	Artery Tibial	5.00256e-108	1.31255	Yes
HsInv0573	ENSG00000204650.14	LINC02210	Pseudogene	Brain Amygdala	2.25802e-13	0.920459	Yes
HsInv0573	ENSG00000204650.14	LINC02210	Pseudogene	Brain Anterior cingulate cortex BA24	1.45591e-12	0.657711	Yes
HsInv0573	ENSG00000204650.14	LINC02210	Pseudogene	Brain Caudate basal ganglia	2.38437e-16	0.786845	Yes
HsInv0573	ENSG00000204650.14	LINC02210	Pseudogene	Brain Cerebellar Hemisphere	4.45e-07	0.380586	No
HsInv0573	ENSG00000204650.14	LINC02210	Pseudogene	Brain Cerebellum	3.89624e-13	0.584905	Yes
HsInv0573	ENSG00000204650.14	LINC02210	Pseudogene	Brain Cortex	5.36701e-22	0.706019	Yes
HsInv0573	ENSG00000204650.14	LINC02210	Pseudogene	Brain Frontal Cortex BA9	9.0737e-11	0.579525	Yes
HsInv0573	ENSG00000204650.14	LINC02210	Pseudogene	Brain Hippocampus	2.43706e-12	0.762828	Yes
HsInv0573	ENSG00000204650.14	LINC02210	Pseudogene	Brain Hypothalamus	3.78724e-13	0.827303	Yes
HsInv0573	ENSG00000204650.14	LINC02210	Pseudogene	Brain Nucleus accumbens basal ganglia	6.34375e-15	0.611304	Yes
HsInv0573	ENSG00000204650.14	LINC02210	Pseudogene	Brain Putamen basal ganglia	9.27118e-17	0.778585	Yes
HsInv0573	ENSG00000204650.14	LINC02210	Pseudogene	Brain Spinal cord cervical c-1	2.03272e-16	1.16964	Yes
HsInv0573	ENSG00000204650.14	LINC02210	Pseudogene	Brain Substantia nigra	1.36814e-06	0.817091	Yes
HsInv0573	ENSG00000204650.14	LINC02210	Pseudogene	Breast Mammary Tissue	4.92551e-68	0.904807	Yes
HsInv0573	ENSG00000204650.14	LINC02210	Pseudogene	Cells EBV-transformed lymphocytes	1.23274e-11	0.621892	Yes
HsInv0573	ENSG00000204650.14	LINC02210	Pseudogene	Cells Transformed fibroblasts	1.31478e-98	1.25954	Yes
HsInv0573	ENSG00000204650.14	LINC02210	Pseudogene	Colon Sigmoid	1.81535e-48	1.0702	Yes
HsInv0573	ENSG00000204650.14	LINC02210	Pseudogene	Colon Transverse	1.94394e-67	0.761504	Yes
HsInv0573	ENSG00000204650.14	LINC02210	Pseudogene	Esophagus Gastroesophageal Junction	1.45422e-56	1.071	Yes
HsInv0573	ENSG00000204650.14	LINC02210	Pseudogene	Esophagus Mucosa	3.60445e-53	0.516349	Yes
HsInv0573	ENSG00000204650.14	LINC02210	Pseudogene	Esophagus Muscularis	1.19843e-98	1.17112	Yes
HsInv0573	ENSG00000204650.14	LINC02210	Pseudogene	Heart Atrial Appendage	5.06873e-60	0.950264	Yes
HsInv0573	ENSG00000204650.14	LINC02210	Pseudogene	Heart Left Ventricle	9.34089e-49	0.968735	Yes
HsInv0573	ENSG00000204650.14	LINC02210	Pseudogene	Lung	2.38033e-102	1.14668	Yes
HsInv0573	ENSG00000204650.14	LINC02210	Pseudogene	Minor Salivary Gland	2.08418e-14	0.966997	Yes
HsInv0573	ENSG00000204650.14	LINC02210	Pseudogene	Muscle Skeletal	6.41211e-82	0.755044	Yes
HsInv0573	ENSG00000204650.14	LINC02210	Pseudogene	Nerve Tibial	1.97348e-108	1.08944	Yes
HsInv0573	ENSG00000204650.14	LINC02210	Pseudogene	Ovary	1.4042e-30	1.0692	Yes
HsInv0573	ENSG00000204650.14	LINC02210	Pseudogene	Pancreas	3.97996e-53	1.12093	Yes
HsInv0573	ENSG00000204650.14	LINC02210	Pseudogene	Pituitary	1.27556e-34	0.976483	Yes
HsInv0573	ENSG00000204650.14	LINC02210	Pseudogene	Prostate	1.06212e-29	1.14783	Yes
HsInv0573	ENSG00000204650.14	LINC02210	Pseudogene	Skin Not Sun Exposed Suprapubic	2.071e-97	1.07051	Yes
HsInv0573	ENSG00000204650.14	LINC02210	Pseudogene	Skin Sun Exposed Lower leg	2.03601e-118	1.10562	Yes
HsInv0573	ENSG00000204650.14	LINC02210	Pseudogene	Small Intestine Terminal Ileum	1.78664e-33	0.71288	Yes
HsInv0573	ENSG00000204650.14	LINC02210	Pseudogene	Spleen	2.81517e-40	1.28373	Yes
HsInv0573	ENSG00000204650.14	LINC02210	Pseudogene	Stomach	6.02452e-58	1.10568	Yes
HsInv0573	ENSG00000204650.14	LINC02210	Pseudogene	Testis	6.533e-34	0.681018	Yes
HsInv0573	ENSG00000204650.14	LINC02210	Pseudogene	Thyroid	5.14307e-93	0.965186	Yes
HsInv0573	ENSG00000204650.14	LINC02210	Pseudogene	Uterus	4.79931e-29	0.973295	Yes
HsInv0573	ENSG00000204650.14	LINC02210	Pseudogene	Vagina	1.72697e-15	0.580433	Yes
HsInv0573	ENSG00000204650.14	LINC02210	Pseudogene	Whole Blood	5.73441e-51	0.573923	No
HsInv0573	ENSG00000263142.5	LRRC37A17P	Pseudogene	Brain Cerebellum	1.89775e-05	-0.466041	Yes
HsInv0573	ENSG00000263142.5	LRRC37A17P	Pseudogene	Esophagus Mucosa	3.79696e-10	-0.459463	Yes
HsInv0573	ENSG00000263142.5	LRRC37A17P	Pseudogene	Testis	6.36594e-09	-0.467756	Yes
HsInv0573	ENSG00000214425.7	LRRC37A4P	Pseudogene	Adipose Subcutaneous	3.96238e-94	-1.16904	Yes
HsInv0573	ENSG00000214425.7	LRRC37A4P	Pseudogene	Adipose Visceral Omentum	2.55371e-79	-1.15573	Yes
HsInv0573	ENSG00000214425.7	LRRC37A4P	Pseudogene	Adrenal Gland	1.71288e-43	-1.33327	Yes
HsInv0573	ENSG00000214425.7	LRRC37A4P	Pseudogene	Artery Aorta	9.66942e-65	-1.28158	Yes
HsInv0573	ENSG00000214425.7	LRRC37A4P	Pseudogene	Artery Coronary	1.08902e-35	-1.13589	Yes
HsInv0573	ENSG00000214425.7	LRRC37A4P	Pseudogene	Artery Tibial	3.90217e-76	-1.14692	Yes
HsInv0573	ENSG00000214425.7	LRRC37A4P	Pseudogene	Brain Amygdala	4.80511e-13	-1.43243	Yes
HsInv0573	ENSG00000214425.7	LRRC37A4P	Pseudogene	Brain Anterior cingulate cortex BA24	2.4154e-25	-1.22921	Yes
HsInv0573	ENSG00000214425.7	LRRC37A4P	Pseudogene	Brain Caudate basal ganglia	1.51454e-26	-1.05931	Yes
HsInv0573	ENSG00000214425.7	LRRC37A4P	Pseudogene	Brain Cerebellar Hemisphere	1.56209e-24	-1.10711	Yes
HsInv0573	ENSG00000214425.7	LRRC37A4P	Pseudogene	Brain Cerebellum	6.21137e-29	-1.11812	Yes
HsInv0573	ENSG00000214425.7	LRRC37A4P	Pseudogene	Brain Cortex	1.34719e-33	-1.17422	Yes
HsInv0573	ENSG00000214425.7	LRRC37A4P	Pseudogene	Brain Frontal Cortex BA9	1.32835e-23	-1.15492	Yes
HsInv0573	ENSG00000214425.7	LRRC37A4P	Pseudogene	Brain Hippocampus	1.76621e-19	-1.15796	Yes
HsInv0573	ENSG00000214425.7	LRRC37A4P	Pseudogene	Brain Hypothalamus	7.06362e-25	-1.25409	Yes
HsInv0573	ENSG00000214425.7	LRRC37A4P	Pseudogene	Brain Nucleus accumbens basal ganglia	9.38365e-23	-1.29968	Yes
HsInv0573	ENSG00000214425.7	LRRC37A4P	Pseudogene	Brain Putamen basal ganglia	4.1875e-21	-1.1472	Yes
HsInv0573	ENSG00000214425.7	LRRC37A4P	Pseudogene	Brain Spinal cord cervical c-1	1.74976e-17	-1.283	No
HsInv0573	ENSG00000214425.7	LRRC37A4P	Pseudogene	Brain Substantia nigra	6.22675e-12	-1.32363	Yes
HsInv0573	ENSG00000214425.7	LRRC37A4P	Pseudogene	Breast Mammary Tissue	3.61326e-61	-1.00935	Yes
HsInv0573	ENSG00000214425.7	LRRC37A4P	Pseudogene	Cells EBV-transformed lymphocytes	1.85924e-43	-1.24158	Yes
HsInv0573	ENSG00000214425.7	LRRC37A4P	Pseudogene	Cells Transformed fibroblasts	1.80586e-72	-1.07797	Yes
HsInv0573	ENSG00000214425.7	LRRC37A4P	Pseudogene	Colon Sigmoid	3.01996e-46	-1.25835	Yes
HsInv0573	ENSG00000214425.7	LRRC37A4P	Pseudogene	Colon Transverse	3.20713e-76	-1.21419	Yes
HsInv0573	ENSG00000214425.7	LRRC37A4P	Pseudogene	Esophagus Gastroesophageal Junction	8.05069e-61	-1.28353	Yes
HsInv0573	ENSG00000214425.7	LRRC37A4P	Pseudogene	Esophagus Mucosa	4.97709e-62	-1.06501	Yes
HsInv0573	ENSG00000214425.7	LRRC37A4P	Pseudogene	Esophagus Muscularis	8.21815e-87	-1.28681	Yes
HsInv0573	ENSG00000214425.7	LRRC37A4P	Pseudogene	Heart Atrial Appendage	1.34919e-56	-1.14766	Yes
HsInv0573	ENSG00000214425.7	LRRC37A4P	Pseudogene	Heart Left Ventricle	1.80769e-47	-1.10295	Yes
HsInv0573	ENSG00000214425.7	LRRC37A4P	Pseudogene	Liver	4.46911e-25	-1.02049	No
HsInv0573	ENSG00000214425.7	LRRC37A4P	Pseudogene	Lung	1.27837e-102	-1.20859	Yes
HsInv0573	ENSG00000214425.7	LRRC37A4P	Pseudogene	Minor Salivary Gland	5.59747e-13	-1.0395	Yes
HsInv0573	ENSG00000214425.7	LRRC37A4P	Pseudogene	Muscle Skeletal	1.49855e-50	-0.938882	Yes
HsInv0573	ENSG00000214425.7	LRRC37A4P	Pseudogene	Nerve Tibial	1.1342e-89	-1.26462	Yes
HsInv0573	ENSG00000214425.7	LRRC37A4P	Pseudogene	Ovary	5.2938e-26	-1.37436	Yes
HsInv0573	ENSG00000214425.7	LRRC37A4P	Pseudogene	Pancreas	2.77405e-53	-1.20487	Yes
HsInv0573	ENSG00000214425.7	LRRC37A4P	Pseudogene	Pituitary	1.02576e-44	-1.30801	Yes
HsInv0573	ENSG00000214425.7	LRRC37A4P	Pseudogene	Prostate	2.55785e-24	-0.998259	Yes
HsInv0573	ENSG00000214425.7	LRRC37A4P	Pseudogene	Skin Not Sun Exposed Suprapubic	8.75029e-97	-1.2217	Yes
HsInv0573	ENSG00000214425.7	LRRC37A4P	Pseudogene	Skin Sun Exposed Lower leg	7.38198e-108	-1.15801	Yes
HsInv0573	ENSG00000214425.7	LRRC37A4P	Pseudogene	Small Intestine Terminal Ileum	3.42255e-35	-0.984364	Yes
HsInv0573	ENSG00000214425.7	LRRC37A4P	Pseudogene	Spleen	6.01444e-37	-1.20112	Yes
HsInv0573	ENSG00000214425.7	LRRC37A4P	Pseudogene	Stomach	7.11187e-56	-1.06815	Yes
HsInv0573	ENSG00000214425.7	LRRC37A4P	Pseudogene	Testis	2.96177e-44	-1.10158	Yes
HsInv0573	ENSG00000214425.7	LRRC37A4P	Pseudogene	Thyroid	7.50304e-108	-1.2922	Yes
HsInv0573	ENSG00000214425.7	LRRC37A4P	Pseudogene	Uterus	1.35133e-20	-1.21194	Yes
HsInv0573	ENSG00000214425.7	LRRC37A4P	Pseudogene	Vagina	8.04282e-16	-1.00762	Yes
HsInv0573	ENSG00000214425.7	LRRC37A4P	Pseudogene	Whole Blood	1.37626e-87	-1.19329	Yes
HsInv0573	ENSG00000262500.1	MAPK8IP1P1	Pseudogene	Adrenal Gland	1.06424e-15	0.889703	Yes
HsInv0573	ENSG00000262500.1	MAPK8IP1P1	Pseudogene	Brain Amygdala	2.00807e-12	1.45808	Yes
HsInv0573	ENSG00000262500.1	MAPK8IP1P1	Pseudogene	Brain Anterior cingulate cortex BA24	9.23595e-17	1.12092	Yes
HsInv0573	ENSG00000262500.1	MAPK8IP1P1	Pseudogene	Brain Caudate basal ganglia	8.82269e-20	1.11712	Yes
HsInv0573	ENSG00000262500.1	MAPK8IP1P1	Pseudogene	Brain Cerebellar Hemisphere	6.77976e-23	1.15882	Yes
HsInv0573	ENSG00000262500.1	MAPK8IP1P1	Pseudogene	Brain Cerebellum	5.01192e-24	1.12584	No
HsInv0573	ENSG00000262500.1	MAPK8IP1P1	Pseudogene	Brain Cortex	6.34051e-23	1.21271	Yes
HsInv0573	ENSG00000262500.1	MAPK8IP1P1	Pseudogene	Brain Frontal Cortex BA9	1.15302e-14	1.10472	No
HsInv0573	ENSG00000262500.1	MAPK8IP1P1	Pseudogene	Brain Hippocampus	3.19786e-16	1.15955	No
HsInv0573	ENSG00000262500.1	MAPK8IP1P1	Pseudogene	Brain Hypothalamus	5.36674e-13	1.03557	Yes
HsInv0573	ENSG00000262500.1	MAPK8IP1P1	Pseudogene	Brain Nucleus accumbens basal ganglia	1.27299e-15	1.05276	Yes
HsInv0573	ENSG00000262500.1	MAPK8IP1P1	Pseudogene	Brain Putamen basal ganglia	1.84828e-18	1.13349	No
HsInv0573	ENSG00000262500.1	MAPK8IP1P1	Pseudogene	Brain Spinal cord cervical c-1	2.0325e-10	1.01481	Yes
HsInv0573	ENSG00000262500.1	MAPK8IP1P1	Pseudogene	Brain Substantia nigra	2.64221e-07	1.26704	Yes
HsInv0573	ENSG00000262500.1	MAPK8IP1P1	Pseudogene	Colon Sigmoid	2.99924e-37	1.08434	Yes
HsInv0573	ENSG00000262500.1	MAPK8IP1P1	Pseudogene	Colon Transverse	4.37449e-38	1.00094	No
HsInv0573	ENSG00000262500.1	MAPK8IP1P1	Pseudogene	Esophagus Gastroesophageal Junction	8.63025e-33	1.06258	Yes
HsInv0573	ENSG00000262500.1	MAPK8IP1P1	Pseudogene	Esophagus Mucosa	5.18198e-48	0.944182	No
HsInv0573	ENSG00000262500.1	MAPK8IP1P1	Pseudogene	Esophagus Muscularis	3.73127e-38	0.967388	No
HsInv0573	ENSG00000262500.1	MAPK8IP1P1	Pseudogene	Liver	1.01871e-21	0.958841	Yes
HsInv0573	ENSG00000262500.1	MAPK8IP1P1	Pseudogene	Lung	2.325e-60	1.07899	No
HsInv0573	ENSG00000262500.1	MAPK8IP1P1	Pseudogene	Nerve Tibial	2.78346e-28	0.831978	No
HsInv0573	ENSG00000262500.1	MAPK8IP1P1	Pseudogene	Ovary	3.73525e-18	1.12072	Yes
HsInv0573	ENSG00000262500.1	MAPK8IP1P1	Pseudogene	Pituitary	1.24762e-24	1.16614	Yes
HsInv0573	ENSG00000262500.1	MAPK8IP1P1	Pseudogene	Prostate	5.4327e-24	1.24686	No
HsInv0573	ENSG00000262500.1	MAPK8IP1P1	Pseudogene	Skin Not Sun Exposed Suprapubic	2.381e-69	1.14523	No
HsInv0573	ENSG00000262500.1	MAPK8IP1P1	Pseudogene	Skin Sun Exposed Lower leg	2.76201e-72	1.11589	No
HsInv0573	ENSG00000262500.1	MAPK8IP1P1	Pseudogene	Small Intestine Terminal Ileum	6.26632e-24	1.03782	Yes
HsInv0573	ENSG00000262500.1	MAPK8IP1P1	Pseudogene	Spleen	4.05265e-29	1.13611	Yes
HsInv0573	ENSG00000262500.1	MAPK8IP1P1	Pseudogene	Testis	3.56868e-43	1.21164	Yes
HsInv0573	ENSG00000262500.1	MAPK8IP1P1	Pseudogene	Thyroid	4.94218e-68	1.13151	Yes
HsInv0573	ENSG00000262500.1	MAPK8IP1P1	Pseudogene	Uterus	3.83187e-16	0.969184	Yes
HsInv0573	ENSG00000262500.1	MAPK8IP1P1	Pseudogene	Vagina	1.04723e-15	0.936667	No
HsInv0573	ENSG00000262500.1	MAPK8IP1P1	Pseudogene	Whole Blood	4.58681e-59	1.05299	No
HsInv0573	ENSG00000263503.1	MAPK8IP1P2	Pseudogene	Adipose Subcutaneous	9.73862e-67	1.17827	No
HsInv0573	ENSG00000263503.1	MAPK8IP1P2	Pseudogene	Adipose Visceral Omentum	6.13535e-68	1.22733	Yes
HsInv0573	ENSG00000263503.1	MAPK8IP1P2	Pseudogene	Adrenal Gland	3.21466e-30	1.24871	No
HsInv0573	ENSG00000263503.1	MAPK8IP1P2	Pseudogene	Artery Aorta	6.04645e-50	1.15302	No
HsInv0573	ENSG00000263503.1	MAPK8IP1P2	Pseudogene	Artery Coronary	4.06536e-24	1.15206	No
HsInv0573	ENSG00000263503.1	MAPK8IP1P2	Pseudogene	Artery Tibial	3.72802e-65	1.14167	No
HsInv0573	ENSG00000263503.1	MAPK8IP1P2	Pseudogene	Brain Amygdala	2.95816e-16	1.08683	Yes
HsInv0573	ENSG00000263503.1	MAPK8IP1P2	Pseudogene	Brain Anterior cingulate cortex BA24	5.50908e-19	1.15665	Yes
HsInv0573	ENSG00000263503.1	MAPK8IP1P2	Pseudogene	Brain Caudate basal ganglia	8.32164e-20	1.10952	No
HsInv0573	ENSG00000263503.1	MAPK8IP1P2	Pseudogene	Brain Cerebellar Hemisphere	1.53749e-20	1.1372	Yes
HsInv0573	ENSG00000263503.1	MAPK8IP1P2	Pseudogene	Brain Cerebellum	7.0455e-24	1.11013	No
HsInv0573	ENSG00000263503.1	MAPK8IP1P2	Pseudogene	Brain Cortex	1.35432e-24	1.25554	Yes
HsInv0573	ENSG00000263503.1	MAPK8IP1P2	Pseudogene	Brain Frontal Cortex BA9	1.30216e-14	1.06876	Yes
HsInv0573	ENSG00000263503.1	MAPK8IP1P2	Pseudogene	Brain Hippocampus	9.69635e-18	1.20219	No
HsInv0573	ENSG00000263503.1	MAPK8IP1P2	Pseudogene	Brain Hypothalamus	1.03292e-17	1.2412	Yes
HsInv0573	ENSG00000263503.1	MAPK8IP1P2	Pseudogene	Brain Nucleus accumbens basal ganglia	2.69465e-15	1.02196	Yes
HsInv0573	ENSG00000263503.1	MAPK8IP1P2	Pseudogene	Brain Putamen basal ganglia	2.87685e-19	1.12543	No
HsInv0573	ENSG00000263503.1	MAPK8IP1P2	Pseudogene	Brain Spinal cord cervical c-1	1.84162e-13	1.09458	No
HsInv0573	ENSG00000263503.1	MAPK8IP1P2	Pseudogene	Brain Substantia nigra	1e-09	1.3918	No
HsInv0573	ENSG00000263503.1	MAPK8IP1P2	Pseudogene	Breast Mammary Tissue	1.47761e-43	1.16416	No
HsInv0573	ENSG00000263503.1	MAPK8IP1P2	Pseudogene	Cells EBV-transformed lymphocytes	3.90324e-27	1.0866	Yes
HsInv0573	ENSG00000263503.1	MAPK8IP1P2	Pseudogene	Cells Transformed fibroblasts	3.07279e-60	1.12872	Yes
HsInv0573	ENSG00000263503.1	MAPK8IP1P2	Pseudogene	Colon Sigmoid	2.02539e-34	1.14686	No
HsInv0573	ENSG00000263503.1	MAPK8IP1P2	Pseudogene	Colon Transverse	1.44895e-49	1.12309	No
HsInv0573	ENSG00000263503.1	MAPK8IP1P2	Pseudogene	Esophagus Gastroesophageal Junction	3.90446e-42	1.17106	No
HsInv0573	ENSG00000263503.1	MAPK8IP1P2	Pseudogene	Esophagus Mucosa	1.39543e-66	1.19761	No
HsInv0573	ENSG00000263503.1	MAPK8IP1P2	Pseudogene	Esophagus Muscularis	2.16318e-55	1.15848	No
HsInv0573	ENSG00000263503.1	MAPK8IP1P2	Pseudogene	Heart Atrial Appendage	1.23389e-48	1.12196	Yes
HsInv0573	ENSG00000263503.1	MAPK8IP1P2	Pseudogene	Heart Left Ventricle	5.61444e-49	1.12916	No
HsInv0573	ENSG00000263503.1	MAPK8IP1P2	Pseudogene	Liver	2.15116e-32	1.14781	No
HsInv0573	ENSG00000263503.1	MAPK8IP1P2	Pseudogene	Lung	1.68797e-62	1.11557	No
HsInv0573	ENSG00000263503.1	MAPK8IP1P2	Pseudogene	Minor Salivary Gland	9.41314e-16	1.2373	Yes
HsInv0573	ENSG00000263503.1	MAPK8IP1P2	Pseudogene	Muscle Skeletal	3.23304e-95	1.14803	No
HsInv0573	ENSG00000263503.1	MAPK8IP1P2	Pseudogene	Nerve Tibial	5.33434e-61	1.18506	No
HsInv0573	ENSG00000263503.1	MAPK8IP1P2	Pseudogene	Ovary	4.03629e-18	1.11461	No
HsInv0573	ENSG00000263503.1	MAPK8IP1P2	Pseudogene	Pancreas	9.52948e-24	0.955486	No
HsInv0573	ENSG00000263503.1	MAPK8IP1P2	Pseudogene	Pituitary	3.36108e-28	1.1608	Yes
HsInv0573	ENSG00000263503.1	MAPK8IP1P2	Pseudogene	Prostate	1.14559e-26	1.36603	No
HsInv0573	ENSG00000263503.1	MAPK8IP1P2	Pseudogene	Skin Not Sun Exposed Suprapubic	5.85033e-70	1.20049	No
HsInv0573	ENSG00000263503.1	MAPK8IP1P2	Pseudogene	Skin Sun Exposed Lower leg	2.04676e-74	1.18693	No
HsInv0573	ENSG00000263503.1	MAPK8IP1P2	Pseudogene	Small Intestine Terminal Ileum	1.08854e-27	1.16208	Yes
HsInv0573	ENSG00000263503.1	MAPK8IP1P2	Pseudogene	Spleen	1.91021e-24	1.13497	Yes
HsInv0573	ENSG00000263503.1	MAPK8IP1P2	Pseudogene	Stomach	1.08915e-44	1.17433	No
HsInv0573	ENSG00000263503.1	MAPK8IP1P2	Pseudogene	Testis	3.69927e-43	0.875493	Yes
HsInv0573	ENSG00000263503.1	MAPK8IP1P2	Pseudogene	Thyroid	8.02027e-79	1.24369	Yes
HsInv0573	ENSG00000263503.1	MAPK8IP1P2	Pseudogene	Uterus	1.75553e-16	1.05353	No
HsInv0573	ENSG00000263503.1	MAPK8IP1P2	Pseudogene	Vagina	8.78623e-13	0.93874	Yes
HsInv0573	ENSG00000263503.1	MAPK8IP1P2	Pseudogene	Whole Blood	1.46116e-72	1.19735	No
HsInv0573	ENSG00000261575.2	RP11-259G18.1	Pseudogene	Adipose Subcutaneous	8.7946e-12	0.516009	Yes
HsInv0573	ENSG00000261575.2	RP11-259G18.1	Pseudogene	Adipose Visceral Omentum	9.77089e-07	0.451279	Yes
HsInv0573	ENSG00000261575.2	RP11-259G18.1	Pseudogene	Artery Aorta	8.49107e-13	0.703724	Yes
HsInv0573	ENSG00000261575.2	RP11-259G18.1	Pseudogene	Artery Tibial	4.14604e-07	0.409458	Yes
HsInv0573	ENSG00000261575.2	RP11-259G18.1	Pseudogene	Brain Amygdala	1.27373e-07	0.831997	Yes
HsInv0573	ENSG00000261575.2	RP11-259G18.1	Pseudogene	Brain Anterior cingulate cortex BA24	2.92474e-10	0.813222	Yes
HsInv0573	ENSG00000261575.2	RP11-259G18.1	Pseudogene	Brain Caudate basal ganglia	6.81816e-14	0.952844	Yes
HsInv0573	ENSG00000261575.2	RP11-259G18.1	Pseudogene	Brain Cerebellar Hemisphere	2.83142e-26	1.21946	Yes
HsInv0573	ENSG00000261575.2	RP11-259G18.1	Pseudogene	Brain Cerebellum	4.50105e-34	1.1705	Yes
HsInv0573	ENSG00000261575.2	RP11-259G18.1	Pseudogene	Brain Cortex	7.2103e-15	0.99248	Yes
HsInv0573	ENSG00000261575.2	RP11-259G18.1	Pseudogene	Brain Frontal Cortex BA9	6.36101e-10	0.823044	Yes
HsInv0573	ENSG00000261575.2	RP11-259G18.1	Pseudogene	Brain Hypothalamus	8.42634e-07	0.763899	Yes
HsInv0573	ENSG00000261575.2	RP11-259G18.1	Pseudogene	Brain Nucleus accumbens basal ganglia	3.26984e-12	0.837854	Yes
HsInv0573	ENSG00000261575.2	RP11-259G18.1	Pseudogene	Brain Putamen basal ganglia	1.80849e-11	0.964425	No
HsInv0573	ENSG00000261575.2	RP11-259G18.1	Pseudogene	Cells EBV-transformed lymphocytes	2.53049e-09	0.791363	Yes
HsInv0573	ENSG00000261575.2	RP11-259G18.1	Pseudogene	Cells Transformed fibroblasts	3.11845e-10	0.601921	No
HsInv0573	ENSG00000261575.2	RP11-259G18.1	Pseudogene	Colon Sigmoid	1.17028e-08	0.664236	Yes
HsInv0573	ENSG00000261575.2	RP11-259G18.1	Pseudogene	Colon Transverse	8.11163e-08	0.549888	No
HsInv0573	ENSG00000261575.2	RP11-259G18.1	Pseudogene	Esophagus Gastroesophageal Junction	2.49696e-13	0.761367	Yes
HsInv0573	ENSG00000261575.2	RP11-259G18.1	Pseudogene	Esophagus Mucosa	6.63323e-19	0.681553	Yes
HsInv0573	ENSG00000261575.2	RP11-259G18.1	Pseudogene	Esophagus Muscularis	1.83785e-16	0.718897	Yes
HsInv0573	ENSG00000261575.2	RP11-259G18.1	Pseudogene	Heart Atrial Appendage	1.26182e-08	0.570925	Yes
HsInv0573	ENSG00000261575.2	RP11-259G18.1	Pseudogene	Heart Left Ventricle	4.61568e-07	0.483195	No
HsInv0573	ENSG00000261575.2	RP11-259G18.1	Pseudogene	Muscle Skeletal	1.67521e-05	0.234724	No
HsInv0573	ENSG00000261575.2	RP11-259G18.1	Pseudogene	Nerve Tibial	1.70683e-11	0.57368	Yes
HsInv0573	ENSG00000261575.2	RP11-259G18.1	Pseudogene	Ovary	4.35718e-08	0.917873	Yes
HsInv0573	ENSG00000261575.2	RP11-259G18.1	Pseudogene	Pancreas	1.24868e-17	0.644957	Yes
HsInv0573	ENSG00000261575.2	RP11-259G18.1	Pseudogene	Pituitary	1.0828e-10	0.746816	Yes
HsInv0573	ENSG00000261575.2	RP11-259G18.1	Pseudogene	Prostate	2.2399e-09	0.909249	Yes
HsInv0573	ENSG00000261575.2	RP11-259G18.1	Pseudogene	Skin Not Sun Exposed Suprapubic	1.02772e-18	0.635174	Yes
HsInv0573	ENSG00000261575.2	RP11-259G18.1	Pseudogene	Skin Sun Exposed Lower leg	2.54146e-28	0.701718	Yes
HsInv0573	ENSG00000261575.2	RP11-259G18.1	Pseudogene	Small Intestine Terminal Ileum	1.13628e-07	0.655547	No
HsInv0573	ENSG00000261575.2	RP11-259G18.1	Pseudogene	Spleen	4.41469e-10	0.826107	Yes
HsInv0573	ENSG00000261575.2	RP11-259G18.1	Pseudogene	Testis	1.45057e-43	1.12414	Yes
HsInv0573	ENSG00000261575.2	RP11-259G18.1	Pseudogene	Thyroid	4.30367e-13	0.557472	Yes
HsInv0573	ENSG00000261575.2	RP11-259G18.1	Pseudogene	Uterus	6.33367e-08	0.847309	Yes
HsInv0573	ENSG00000261575.2	RP11-259G18.1	Pseudogene	Vagina	1.77997e-08	0.764505	No
HsInv0573	ENSG00000262539.1	RP11-259G18.3	Pseudogene	Adipose Subcutaneous	1.60808e-80	1.25136	Yes
HsInv0573	ENSG00000262539.1	RP11-259G18.3	Pseudogene	Adipose Visceral Omentum	4.1906e-71	1.29654	Yes
HsInv0573	ENSG00000262539.1	RP11-259G18.3	Pseudogene	Adrenal Gland	8.63223e-30	1.24822	Yes
HsInv0573	ENSG00000262539.1	RP11-259G18.3	Pseudogene	Artery Aorta	5.11054e-56	1.1924	Yes
HsInv0573	ENSG00000262539.1	RP11-259G18.3	Pseudogene	Artery Coronary	3.44603e-24	1.21212	No
HsInv0573	ENSG00000262539.1	RP11-259G18.3	Pseudogene	Artery Tibial	6.76308e-76	1.23859	Yes
HsInv0573	ENSG00000262539.1	RP11-259G18.3	Pseudogene	Brain Amygdala	5.02778e-12	1.04596	Yes
HsInv0573	ENSG00000262539.1	RP11-259G18.3	Pseudogene	Brain Anterior cingulate cortex BA24	1.05625e-18	1.14745	Yes
HsInv0573	ENSG00000262539.1	RP11-259G18.3	Pseudogene	Brain Caudate basal ganglia	1.61821e-27	1.24163	Yes
HsInv0573	ENSG00000262539.1	RP11-259G18.3	Pseudogene	Brain Cerebellar Hemisphere	6.71149e-20	1.23378	Yes
HsInv0573	ENSG00000262539.1	RP11-259G18.3	Pseudogene	Brain Cerebellum	1.10175e-29	1.2577	Yes
HsInv0573	ENSG00000262539.1	RP11-259G18.3	Pseudogene	Brain Cortex	9.71249e-29	1.23757	Yes
HsInv0573	ENSG00000262539.1	RP11-259G18.3	Pseudogene	Brain Frontal Cortex BA9	2.78251e-13	1.0688	Yes
HsInv0573	ENSG00000262539.1	RP11-259G18.3	Pseudogene	Brain Hippocampus	4.74922e-15	1.1166	Yes
HsInv0573	ENSG00000262539.1	RP11-259G18.3	Pseudogene	Brain Hypothalamus	1.09601e-16	1.15728	Yes
HsInv0573	ENSG00000262539.1	RP11-259G18.3	Pseudogene	Brain Nucleus accumbens basal ganglia	9.14844e-22	1.24009	Yes
HsInv0573	ENSG00000262539.1	RP11-259G18.3	Pseudogene	Brain Putamen basal ganglia	2.64677e-22	1.21713	Yes
HsInv0573	ENSG00000262539.1	RP11-259G18.3	Pseudogene	Brain Spinal cord cervical c-1	9.78932e-14	1.16629	Yes
HsInv0573	ENSG00000262539.1	RP11-259G18.3	Pseudogene	Brain Substantia nigra	2.74593e-08	1.18876	Yes
HsInv0573	ENSG00000262539.1	RP11-259G18.3	Pseudogene	Breast Mammary Tissue	1.07336e-45	1.22724	Yes
HsInv0573	ENSG00000262539.1	RP11-259G18.3	Pseudogene	Cells EBV-transformed lymphocytes	4.99958e-31	1.28697	Yes
HsInv0573	ENSG00000262539.1	RP11-259G18.3	Pseudogene	Cells Transformed fibroblasts	2.75254e-66	1.16878	Yes
HsInv0573	ENSG00000262539.1	RP11-259G18.3	Pseudogene	Colon Sigmoid	5.99523e-36	1.21303	No
HsInv0573	ENSG00000262539.1	RP11-259G18.3	Pseudogene	Colon Transverse	3.92558e-44	1.20655	No
HsInv0573	ENSG00000262539.1	RP11-259G18.3	Pseudogene	Esophagus Gastroesophageal Junction	3.78719e-47	1.21706	Yes
HsInv0573	ENSG00000262539.1	RP11-259G18.3	Pseudogene	Esophagus Mucosa	7.93786e-71	1.23242	No
HsInv0573	ENSG00000262539.1	RP11-259G18.3	Pseudogene	Esophagus Muscularis	2.49753e-63	1.22292	Yes
HsInv0573	ENSG00000262539.1	RP11-259G18.3	Pseudogene	Heart Atrial Appendage	1.67793e-49	1.2358	Yes
HsInv0573	ENSG00000262539.1	RP11-259G18.3	Pseudogene	Heart Left Ventricle	3.02653e-46	1.17688	No
HsInv0573	ENSG00000262539.1	RP11-259G18.3	Pseudogene	Liver	1.34987e-33	1.13317	Yes
HsInv0573	ENSG00000262539.1	RP11-259G18.3	Pseudogene	Lung	1.11687e-61	1.21099	Yes
HsInv0573	ENSG00000262539.1	RP11-259G18.3	Pseudogene	Minor Salivary Gland	1.90373e-17	1.29168	No
HsInv0573	ENSG00000262539.1	RP11-259G18.3	Pseudogene	Muscle Skeletal	1.09054e-84	1.22368	Yes
HsInv0573	ENSG00000262539.1	RP11-259G18.3	Pseudogene	Nerve Tibial	3.74488e-60	1.21908	Yes
HsInv0573	ENSG00000262539.1	RP11-259G18.3	Pseudogene	Ovary	9.34212e-22	1.33942	No
HsInv0573	ENSG00000262539.1	RP11-259G18.3	Pseudogene	Pancreas	8.19185e-37	1.22998	Yes
HsInv0573	ENSG00000262539.1	RP11-259G18.3	Pseudogene	Pituitary	7.91811e-27	1.23267	Yes
HsInv0573	ENSG00000262539.1	RP11-259G18.3	Pseudogene	Prostate	5.75866e-26	1.33977	Yes
HsInv0573	ENSG00000262539.1	RP11-259G18.3	Pseudogene	Skin Not Sun Exposed Suprapubic	3.2853e-73	1.29655	Yes
HsInv0573	ENSG00000262539.1	RP11-259G18.3	Pseudogene	Skin Sun Exposed Lower leg	2.91539e-85	1.26441	No
HsInv0573	ENSG00000262539.1	RP11-259G18.3	Pseudogene	Small Intestine Terminal Ileum	1.17975e-31	1.19463	Yes
HsInv0573	ENSG00000262539.1	RP11-259G18.3	Pseudogene	Spleen	1.79557e-29	1.30273	Yes
HsInv0573	ENSG00000262539.1	RP11-259G18.3	Pseudogene	Stomach	1.64126e-45	1.29995	Yes
HsInv0573	ENSG00000262539.1	RP11-259G18.3	Pseudogene	Testis	2.48286e-49	1.30736	Yes
HsInv0573	ENSG00000262539.1	RP11-259G18.3	Pseudogene	Thyroid	4.54842e-83	1.31292	Yes
HsInv0573	ENSG00000262539.1	RP11-259G18.3	Pseudogene	Uterus	6.12159e-23	1.24648	Yes
HsInv0573	ENSG00000262539.1	RP11-259G18.3	Pseudogene	Vagina	2.68187e-16	1.07679	Yes
HsInv0573	ENSG00000262539.1	RP11-259G18.3	Pseudogene	Whole Blood	8.29915e-79	1.26144	No
HsInv0573	ENSG00000204652.6	RPS26P8	Pseudogene	Adipose Subcutaneous	6.35681e-13	0.606437	No
HsInv0573	ENSG00000204652.6	RPS26P8	Pseudogene	Breast Mammary Tissue	1.77241e-10	0.629219	No
HsInv0573	ENSG00000204652.6	RPS26P8	Pseudogene	Nerve Tibial	8.30589e-30	1.01957	Yes
HsInv0573	ENSG00000204652.6	RPS26P8	Pseudogene	Ovary	1.8749e-05	0.751804	Yes
HsInv0573	ENSG00000204652.6	RPS26P8	Pseudogene	Pituitary	8.30126e-12	0.870629	Yes
HsInv0573	ENSG00000204652.6	RPS26P8	Pseudogene	Skin Not Sun Exposed Suprapubic	2.82826e-06	0.427095	Yes
HsInv0573	ENSG00000204652.6	RPS26P8	Pseudogene	Skin Sun Exposed Lower leg	1.62592e-08	0.458423	No
HsInv0573	ENSG00000204652.6	RPS26P8	Pseudogene	Small Intestine Terminal Ileum	1.94238e-05	0.595882	Yes
HsInv0573	ENSG00000204652.6	RPS26P8	Pseudogene	Testis	3.73742e-05	0.207399	Yes
HsInv0573	ENSG00000204652.6	RPS26P8	Pseudogene	Thyroid	1.38049e-20	0.751105	Yes
HsInv0573	ENSG00000204652.6	RPS26P8	Pseudogene	Vagina	2.63636e-07	0.853636	No
HsInv0573	ENSG00000266918.1	RP11-798G7.8	TEC	Brain Cerebellar Hemisphere	2.11575e-08	0.766305	No
HsInv0573	ENSG00000266918.1	RP11-798G7.8	TEC	Brain Cerebellum	3.01349e-06	0.587796	No
HsInv0573	ENSG00000266918.1	RP11-798G7.8	TEC	Colon Sigmoid	9.50556e-06	0.463465	No
HsInv0573	ENSG00000266918.1	RP11-798G7.8	TEC	Colon Transverse	2.11676e-05	0.434867	No
HsInv0573	ENSG00000266918.1	RP11-798G7.8	TEC	Muscle Skeletal	9.81709e-16	0.543953	Yes
HsInv0573	ENSG00000266918.1	RP11-798G7.8	TEC	Nerve Tibial	1.507e-06	0.423963	No
HsInv0573	ENSG00000266918.1	RP11-798G7.8	TEC	Thyroid	3.87906e-12	0.555194	No
HsInv0573	ENSG00000266918.1	RP11-798G7.8	TEC	Uterus	2.85731e-06	0.689964	Yes
HsInv0786	ENSG00000260442.5	ATP2A1-AS1	Antisense	Muscle Skeletal	2.78323e-20	-0.374062	No
HsInv0786	ENSG00000261766.1	RP11-22P6.2	Antisense	Brain Cerebellum	6.51858e-06	-0.405965	No
HsInv0786	ENSG00000261766.1	RP11-22P6.2	Antisense	Muscle Skeletal	5.54871e-05	-0.23078	No
HsInv0786	ENSG00000251417.2	RP11-1348G14.4	LincRNA	Adipose Subcutaneous	3.79094e-14	-0.486754	No
HsInv0786	ENSG00000251417.2	RP11-1348G14.4	LincRNA	Artery Coronary	1.2999e-05	-0.392883	No
HsInv0786	ENSG00000251417.2	RP11-1348G14.4	LincRNA	Brain Nucleus accumbens basal ganglia	1.5736e-05	-0.527153	No
HsInv0786	ENSG00000251417.2	RP11-1348G14.4	LincRNA	Colon Sigmoid	3.1676e-08	-0.424982	No
HsInv0786	ENSG00000251417.2	RP11-1348G14.4	LincRNA	Colon Transverse	3.12574e-07	-0.380537	No
HsInv0786	ENSG00000251417.2	RP11-1348G14.4	LincRNA	Heart Atrial Appendage	1.53885e-08	-0.411641	No
HsInv0786	ENSG00000251417.2	RP11-1348G14.4	LincRNA	Heart Left Ventricle	1.606e-06	-0.394963	No
HsInv0786	ENSG00000251417.2	RP11-1348G14.4	LincRNA	Lung	1.10284e-09	-0.394098	No
HsInv0786	ENSG00000251417.2	RP11-1348G14.4	LincRNA	Nerve Tibial	4.81429e-14	-0.489887	No
HsInv0786	ENSG00000251417.2	RP11-1348G14.4	LincRNA	Pituitary	2.25904e-05	-0.317099	No
HsInv0786	ENSG00000251417.2	RP11-1348G14.4	LincRNA	Prostate	2.45122e-07	-0.478587	No
HsInv0786	ENSG00000251417.2	RP11-1348G14.4	LincRNA	Skin Not Sun Exposed Suprapubic	1.36876e-09	-0.411957	No
HsInv0786	ENSG00000251417.2	RP11-1348G14.4	LincRNA	Small Intestine Terminal Ileum	7.03e-07	-0.485645	No
HsInv0786	ENSG00000184730.10	APOBR	Protein coding	Skin Not Sun Exposed Suprapubic	2.56474e-05	-0.159391	No
HsInv0786	ENSG00000196296.13	ATP2A1	Protein coding	Nerve Tibial	7.49001e-05	0.215617	No
HsInv0786	ENSG00000196296.13	ATP2A1	Protein coding	Skin Sun Exposed Lower leg	6.09865e-05	0.212743	Yes
HsInv0786	ENSG00000184110.14	EIF3C	Protein coding	Adipose Subcutaneous	8.1488e-07	0.30158	No
HsInv0786	ENSG00000184110.14	EIF3C	Protein coding	Artery Tibial	3.78163e-08	0.339561	No
HsInv0786	ENSG00000184110.14	EIF3C	Protein coding	Cells Transformed fibroblasts	1.6439e-05	0.243447	No
HsInv0786	ENSG00000184110.14	EIF3C	Protein coding	Esophagus Muscularis	7.9028e-06	0.252436	No
HsInv0786	ENSG00000184110.14	EIF3C	Protein coding	Heart Left Ventricle	1.01839e-06	0.226597	No
HsInv0786	ENSG00000184110.14	EIF3C	Protein coding	Testis	5.52036e-06	0.281208	No
HsInv0786	ENSG00000213658.11	LAT	Protein coding	Cells Transformed fibroblasts	4.79524e-05	0.168271	No
HsInv0786	ENSG00000213658.11	LAT	Protein coding	Esophagus Muscularis	4.74544e-06	0.138314	No
HsInv0786	ENSG00000213658.11	LAT	Protein coding	Muscle Skeletal	3.65205e-06	0.2007	No
HsInv0786	ENSG00000176953.12	NFATC2IP	Protein coding	Breast Mammary Tissue	2.0072e-05	0.199863	No
HsInv0786	ENSG00000176953.12	NFATC2IP	Protein coding	Testis	2.94789e-07	0.230204	No
HsInv0786	ENSG00000198156.10	NPIPB6	Protein coding	Skin Sun Exposed Lower leg	4.35488e-08	0.256754	No
HsInv0786	ENSG00000198156.10	NPIPB6	Protein coding	Testis	1.31127e-31	-0.563047	No
HsInv0786	ENSG00000233232.2	NPIPB7	Protein coding	Adipose Subcutaneous	3.50652e-09	-0.437306	Yes
HsInv0786	ENSG00000233232.2	NPIPB7	Protein coding	Adipose Visceral Omentum	1.65798e-05	-0.334606	No
HsInv0786	ENSG00000233232.2	NPIPB7	Protein coding	Artery Aorta	5.6012e-10	-0.553989	No
HsInv0786	ENSG00000233232.2	NPIPB7	Protein coding	Artery Coronary	7.15043e-08	-0.576362	No
HsInv0786	ENSG00000233232.2	NPIPB7	Protein coding	Artery Tibial	5.05111e-17	-0.566378	Yes
HsInv0786	ENSG00000233232.2	NPIPB7	Protein coding	Brain Caudate basal ganglia	3.60794e-07	-0.518252	No
HsInv0786	ENSG00000233232.2	NPIPB7	Protein coding	Brain Cerebellum	5.1336e-18	-0.751012	No
HsInv0786	ENSG00000233232.2	NPIPB7	Protein coding	Brain Frontal Cortex BA9	3.73119e-06	-0.570812	No
HsInv0786	ENSG00000233232.2	NPIPB7	Protein coding	Brain Hippocampus	3.77214e-06	-0.670641	No
HsInv0786	ENSG00000233232.2	NPIPB7	Protein coding	Brain Hypothalamus	3.41837e-08	-0.665859	Yes
HsInv0786	ENSG00000233232.2	NPIPB7	Protein coding	Brain Nucleus accumbens basal ganglia	2.6926e-10	-0.597145	No
HsInv0786	ENSG00000233232.2	NPIPB7	Protein coding	Brain Putamen basal ganglia	3.55818e-07	-0.675566	No
HsInv0786	ENSG00000233232.2	NPIPB7	Protein coding	Breast Mammary Tissue	5.11752e-06	-0.406857	No
HsInv0786	ENSG00000233232.2	NPIPB7	Protein coding	Colon Transverse	1.057e-06	-0.351252	No
HsInv0786	ENSG00000233232.2	NPIPB7	Protein coding	Liver	8.96426e-06	-0.456272	No
HsInv0786	ENSG00000233232.2	NPIPB7	Protein coding	Lung	1.55921e-06	-0.369526	No
HsInv0786	ENSG00000233232.2	NPIPB7	Protein coding	Spleen	2.721e-06	-0.568152	No
HsInv0786	ENSG00000233232.2	NPIPB7	Protein coding	Whole Blood	4.46913e-13	-0.423227	Yes
HsInv0786	ENSG00000196993.8	NPIPB9	Protein coding	Artery Aorta	3.60894e-06	-0.423916	No
HsInv0786	ENSG00000196993.8	NPIPB9	Protein coding	Artery Tibial	3.34891e-06	-0.338849	No
HsInv0786	ENSG00000196993.8	NPIPB9	Protein coding	Cells Transformed fibroblasts	1.72424e-05	-0.310977	No
HsInv0786	ENSG00000196993.8	NPIPB9	Protein coding	Nerve Tibial	8.40407e-05	-0.315468	No
HsInv0786	ENSG00000196993.8	NPIPB9	Protein coding	Stomach	1.67116e-07	-0.411639	No
HsInv0786	ENSG00000176046.8	NUPR1	Protein coding	Artery Aorta	3.39076e-09	-0.348351	No
HsInv0786	ENSG00000176046.8	NUPR1	Protein coding	Brain Cerebellar Hemisphere	1.20351e-05	0.280341	No
HsInv0786	ENSG00000176046.8	NUPR1	Protein coding	Esophagus Muscularis	9.65576e-12	-0.283606	No
HsInv0786	ENSG00000176046.8	NUPR1	Protein coding	Testis	1.95435e-05	-0.194794	No
HsInv0786	ENSG00000177548.12	RABEP2	Protein coding	Adrenal Gland	3.21269e-06	0.237785	No
HsInv0786	ENSG00000188322.4	SBK1	Protein coding	Skin Not Sun Exposed Suprapubic	1.24168e-07	-0.237602	Yes
HsInv0786	ENSG00000176476.8	SGF29	Protein coding	Artery Tibial	1.89722e-06	-0.126578	No
HsInv0786	ENSG00000176476.8	SGF29	Protein coding	Muscle Skeletal	1.12931e-06	-0.107954	No
HsInv0786	ENSG00000176476.8	SGF29	Protein coding	Pancreas	9.83659e-06	-0.220387	No
HsInv0786	ENSG00000176476.8	SGF29	Protein coding	Whole Blood	3.69964e-06	-0.146492	No
HsInv0786	ENSG00000178188.14	SH2B1	Protein coding	Adipose Subcutaneous	1.3e-08	-0.170177	No
HsInv0786	ENSG00000178188.14	SH2B1	Protein coding	Adipose Visceral Omentum	4.81269e-07	-0.13524	No
HsInv0786	ENSG00000178188.14	SH2B1	Protein coding	Adrenal Gland	9.51195e-08	-0.233293	No
HsInv0786	ENSG00000178188.14	SH2B1	Protein coding	Brain Cerebellum	6.3595e-06	-0.198436	No
HsInv0786	ENSG00000178188.14	SH2B1	Protein coding	Esophagus Gastroesophageal Junction	8.46832e-07	-0.202974	No
HsInv0786	ENSG00000178188.14	SH2B1	Protein coding	Esophagus Mucosa	1.95729e-05	-0.0922495	No
HsInv0786	ENSG00000178188.14	SH2B1	Protein coding	Esophagus Muscularis	1.20755e-07	-0.122596	No
HsInv0786	ENSG00000178188.14	SH2B1	Protein coding	Heart Left Ventricle	1.21463e-06	-0.167959	No
HsInv0786	ENSG00000178188.14	SH2B1	Protein coding	Lung	2.39564e-05	-0.0890624	No
HsInv0786	ENSG00000178188.14	SH2B1	Protein coding	Whole Blood	6.36919e-06	-0.109085	No
HsInv0786	ENSG00000169682.17	SPNS1	Protein coding	Cells EBV-transformed lymphocytes	7.001e-07	0.510321	No
HsInv0786	ENSG00000169682.17	SPNS1	Protein coding	Lung	2.69117e-07	0.191829	No
HsInv0786	ENSG00000196502.11	SULT1A1	Protein coding	Artery Aorta	2.53431e-06	-0.276208	No
HsInv0786	ENSG00000196502.11	SULT1A1	Protein coding	Artery Tibial	5.06092e-06	-0.206968	No
HsInv0786	ENSG00000196502.11	SULT1A1	Protein coding	Brain Cerebellum	4.259e-06	-0.454563	No
HsInv0786	ENSG00000196502.11	SULT1A1	Protein coding	Cells Transformed fibroblasts	1.08821e-06	-0.211536	No
HsInv0786	ENSG00000196502.11	SULT1A1	Protein coding	Colon Sigmoid	4.38824e-06	-0.336584	No
HsInv0786	ENSG00000196502.11	SULT1A1	Protein coding	Colon Transverse	1.93987e-05	-0.170472	No
HsInv0786	ENSG00000196502.11	SULT1A1	Protein coding	Esophagus Muscularis	2.39136e-06	-0.262578	No
HsInv0786	ENSG00000196502.11	SULT1A1	Protein coding	Lung	4e-09	-0.329927	No
HsInv0786	ENSG00000196502.11	SULT1A1	Protein coding	Muscle Skeletal	8.2e-08	-0.230107	No
HsInv0786	ENSG00000196502.11	SULT1A1	Protein coding	Pancreas	1.49366e-06	-0.358565	No
HsInv0786	ENSG00000196502.11	SULT1A1	Protein coding	Pituitary	1.35828e-10	-0.557592	No
HsInv0786	ENSG00000196502.11	SULT1A1	Protein coding	Prostate	6.315e-06	-0.420391	No
HsInv0786	ENSG00000196502.11	SULT1A1	Protein coding	Skin Not Sun Exposed Suprapubic	2.335e-06	-0.220719	No
HsInv0786	ENSG00000196502.11	SULT1A1	Protein coding	Skin Sun Exposed Lower leg	5.15943e-06	-0.224501	No
HsInv0786	ENSG00000196502.11	SULT1A1	Protein coding	Stomach	1.08752e-09	-0.321371	No
HsInv0786	ENSG00000197165.10	SULT1A2	Protein coding	Brain Amygdala	3.08605e-06	0.773703	No
HsInv0786	ENSG00000197165.10	SULT1A2	Protein coding	Brain Anterior cingulate cortex BA24	1.47359e-09	0.778873	No
HsInv0786	ENSG00000197165.10	SULT1A2	Protein coding	Brain Caudate basal ganglia	4.25912e-08	0.59795	No
HsInv0786	ENSG00000197165.10	SULT1A2	Protein coding	Brain Cortex	4.37343e-08	0.655047	No
HsInv0786	ENSG00000197165.10	SULT1A2	Protein coding	Brain Frontal Cortex BA9	8.67271e-06	0.512986	No
HsInv0786	ENSG00000197165.10	SULT1A2	Protein coding	Brain Hippocampus	5.98833e-07	0.609086	No
HsInv0786	ENSG00000197165.10	SULT1A2	Protein coding	Brain Nucleus accumbens basal ganglia	2.07955e-06	0.544398	No
HsInv0786	ENSG00000197165.10	SULT1A2	Protein coding	Brain Putamen basal ganglia	1.595e-08	0.67987	No
HsInv0786	ENSG00000197165.10	SULT1A2	Protein coding	Brain Spinal cord cervical c-1	5.08e-07	0.840487	No
HsInv0786	ENSG00000197165.10	SULT1A2	Protein coding	Cells Transformed fibroblasts	3.01431e-07	0.346977	No
HsInv0786	ENSG00000197165.10	SULT1A2	Protein coding	Colon Sigmoid	5.85113e-08	0.446147	Yes
HsInv0786	ENSG00000197165.10	SULT1A2	Protein coding	Esophagus Gastroesophageal Junction	3.83866e-14	0.531378	Yes
HsInv0786	ENSG00000197165.10	SULT1A2	Protein coding	Lung	1.84386e-07	0.239408	No
HsInv0786	ENSG00000197165.10	SULT1A2	Protein coding	Ovary	2.85039e-08	0.623245	No
HsInv0786	ENSG00000197165.10	SULT1A2	Protein coding	Pancreas	8.31243e-08	0.44113	No
HsInv0786	ENSG00000197165.10	SULT1A2	Protein coding	Pituitary	1.5436e-06	0.402777	No
HsInv0786	ENSG00000197165.10	SULT1A2	Protein coding	Skin Not Sun Exposed Suprapubic	1.42543e-07	0.335891	No
HsInv0786	ENSG00000197165.10	SULT1A2	Protein coding	Spleen	2.49927e-11	0.551344	No
HsInv0786	ENSG00000197165.10	SULT1A2	Protein coding	Stomach	3.19077e-13	0.565627	No
HsInv0786	ENSG00000197165.10	SULT1A2	Protein coding	Testis	6.40124e-22	0.868523	No
HsInv0786	ENSG00000197165.10	SULT1A2	Protein coding	Uterus	7.61928e-07	0.651597	No
HsInv0786	ENSG00000178952.10	TUFM	Protein coding	Adipose Subcutaneous	1e-09	0.188377	No
HsInv0786	ENSG00000178952.10	TUFM	Protein coding	Adipose Visceral Omentum	2.6769e-06	0.105714	No
HsInv0786	ENSG00000178952.10	TUFM	Protein coding	Artery Coronary	1.65251e-05	0.199681	Yes
HsInv0786	ENSG00000178952.10	TUFM	Protein coding	Brain Caudate basal ganglia	7.251e-07	0.228751	No
HsInv0786	ENSG00000178952.10	TUFM	Protein coding	Brain Hippocampus	1.15746e-05	0.295357	No
HsInv0786	ENSG00000178952.10	TUFM	Protein coding	Brain Nucleus accumbens basal ganglia	2.66283e-08	0.33139	No
HsInv0786	ENSG00000178952.10	TUFM	Protein coding	Brain Putamen basal ganglia	4.58167e-06	0.260358	No
HsInv0786	ENSG00000178952.10	TUFM	Protein coding	Breast Mammary Tissue	6.80624e-08	0.161468	No
HsInv0786	ENSG00000178952.10	TUFM	Protein coding	Colon Sigmoid	1.07941e-08	0.258257	No
HsInv0786	ENSG00000178952.10	TUFM	Protein coding	Colon Transverse	2.02583e-08	0.138118	No
HsInv0786	ENSG00000178952.10	TUFM	Protein coding	Esophagus Gastroesophageal Junction	7.33657e-08	0.241279	No
HsInv0786	ENSG00000178952.10	TUFM	Protein coding	Esophagus Mucosa	3.72688e-08	0.141683	No
HsInv0786	ENSG00000178952.10	TUFM	Protein coding	Esophagus Muscularis	2.30245e-12	0.235111	No
HsInv0786	ENSG00000178952.10	TUFM	Protein coding	Nerve Tibial	2.59327e-13	0.20992	No
HsInv0786	ENSG00000178952.10	TUFM	Protein coding	Pancreas	6.11161e-11	0.360275	No
HsInv0786	ENSG00000178952.10	TUFM	Protein coding	Skin Not Sun Exposed Suprapubic	9.95632e-11	0.205251	No
HsInv0786	ENSG00000178952.10	TUFM	Protein coding	Small Intestine Terminal Ileum	5.94073e-07	0.158725	No
HsInv0786	ENSG00000178952.10	TUFM	Protein coding	Testis	1.99428e-07	0.260899	No
HsInv0786	ENSG00000259982.1	CDC37P1	Pseudogene	Liver	5.63382e-10	0.599895	Yes
HsInv0786	ENSG00000259982.1	CDC37P1	Pseudogene	Pancreas	1.49014e-17	0.756452	No
HsInv0786	ENSG00000259982.1	CDC37P1	Pseudogene	Small Intestine Terminal Ileum	8.71501e-11	0.701912	No
HsInv0786	ENSG00000259982.1	CDC37P1	Pseudogene	Spleen	4.40449e-10	0.664566	No
HsInv0786	ENSG00000259982.1	CDC37P1	Pseudogene	Uterus	9.8999e-06	0.556365	No
HsInv0786	ENSG00000259982.1	CDC37P1	Pseudogene	Vagina	2.98422e-06	0.59168	No
HsInv0786	ENSG00000261089.1	CDC37P2	Pseudogene	Thyroid	1.34508e-05	-0.20973	No
HsInv0786	ENSG00000270424.1	RP11-1348G14.6	Pseudogene	Nerve Tibial	3.70245e-11	0.462756	No
HsInv0786	ENSG00000270424.1	RP11-1348G14.6	Pseudogene	Skin Not Sun Exposed Suprapubic	6.73086e-08	0.387934	No
HsInv0786	ENSG00000270424.1	RP11-1348G14.6	Pseudogene	Skin Sun Exposed Lower leg	3.61377e-13	0.504373	No
HsInv0786	ENSG00000270424.1	RP11-1348G14.6	Pseudogene	Testis	8.28191e-09	0.511305	No
HsInv0786	ENSG00000270424.1	RP11-1348G14.6	Pseudogene	Thyroid	2.90486e-15	0.524765	No
HsInv0786	ENSG00000271623.1	RP11-435I10.5	Pseudogene	Ovary	2.46841e-09	-0.698433	No
HsInv0786	ENSG00000271623.1	RP11-435I10.5	Pseudogene	Thyroid	2.08042e-26	-0.638788	No
HsInv0830	ENSG00000071889.16	FAM3A	Protein coding	Esophagus Mucosa	1.69991e-05	0.150587	No
HsInv0830	ENSG00000071889.16	FAM3A	Protein coding	Esophagus Muscularis	7.04743e-06	0.224713	No
HsInv0830	ENSG00000071889.16	FAM3A	Protein coding	Skin Not Sun Exposed Suprapubic	7.57597e-05	0.162774	No
HsInv0830	ENSG00000071889.16	FAM3A	Protein coding	Stomach	2.15191e-05	0.220527	No
HsInv0830	ENSG00000196976.7	LAGE3	Protein coding	Nerve Tibial	7.05979e-05	0.155221	No
HsInv0830	ENSG00000130827.6	PLXNA3	Protein coding	Artery Tibial	5.65e-06	-0.146427	No
HsInv0830	ENSG00000130827.6	PLXNA3	Protein coding	Esophagus Mucosa	4.07e-07	-0.268139	No
HsInv0830	ENSG00000130827.6	PLXNA3	Protein coding	Heart Left Ventricle	7.80458e-06	-0.250823	No
HsInv0830	ENSG00000130827.6	PLXNA3	Protein coding	Lung	3.23012e-05	-0.145135	No
HsInv0830	ENSG00000130827.6	PLXNA3	Protein coding	Skin Sun Exposed Lower leg	2.46797e-05	-0.153048	No
HsInv0830	ENSG00000130827.6	PLXNA3	Protein coding	Testis	5.11835e-06	-0.240906	No

[truncated: 5 more sheets: S11-Phenotypic enrichment, S12-Phenotypic traits, S13-Pathological SVs, S14-ddPCR primers, S15-HF-PCR primers]
